# Supplementary material for: Solvent-controlled nucleophilic trifluoromethylthiolation of Morita–Baylis–Hillman carbonates: dual roles of DABCO in activating the Zard's trifluoromethylthiolation reagent and the MBH carbonates
Source: Royal Society of Chemistry journal article supplement (doi:10.1039/c5qo00198f), 2015-01-01
Supplement: c5qo00198f1.pdf [file c5qo00198f1.pdf]

# Solvent-controlled Nucleophilic Trifluoromethylthiolation of Morita-Baylis-Hillman Carbonates: Dual roles of DABCO in activating the Zard's trifluoromethylthiolation reagent and the MBH carbonates

Hai-Bin Yang, Xing Fan, Yin Wei,\* Min Shi\*

*State Key Laboratory of Organometallic Chemistry,*

*Shanghai Institute of Organic Chemistry, Chinese Academy of Sciences,*

*345 Lingling Road, Shanghai 200032 China. [weiyin@mail.sioc.ac.cn](mailto:weiyin@mail.sioc.ac.cn), [mshi@mail.sioc.ac.cn](mailto:mshi@mail.sioc.ac.cn).*

## Contents

|                                                                           |         |
|---------------------------------------------------------------------------|---------|
| General remarks                                                           | S2      |
| Procedure for DABCO-catalyzed primary allylic trifluoromethylthiolation   | S2      |
| Characterization data of <b>3</b>                                         | S2-S23  |
| Procedure for DABCO-catalyzed secondary allylic trifluoromethylthiolation | S23     |
| Characterization data of <b>4</b> , <b>5a</b> and <b>6a</b>               | S23-S47 |
| Procedure for the conversion of product <b>4a</b>                         | S47     |
| Characterization data of product <b>8a</b>                                | S47-S49 |
| X-ray crystal data of compound <b>3l</b>                                  | S50     |

**General remarks.**  $^1\text{H}$  and  $^{13}\text{C}$  NMR spectra were recorded at 400 (or 300) MHz, respectively. HRMS spectra were recorded by EI, MALDI or ESI method. The employed solvents and commercially obtained reagents were used without further purification. All reactions were monitored by TLC with silica gel coated plates. Flash column chromatography was carried out using 300-400 mesh silica gel at increased pressure.

**Procedure for DABCO-catalyzed primary allylic trifluoromethylthiolation reaction of MBH adducts:**

To a solution of MBH adducts **I-3-2** (0.2 mmol) and *O*-octadecyl-*S*-trifluorothiolcarbonate **I-3-1a** (0.4 mmol) in THF (2 mL) was added DABCO (0.04 mmol) and the reaction mixture was stirred for 2 h at room temperature under air. The reaction mixture was concentrated and the crude product was purified by flash chromatograph (silica gel, petroleum ether:dichloromethane = 10:1-5:1) to give the corresponding products **3**.

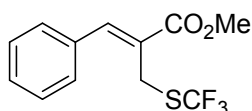

**Compound 3a:** Yield: 50 mg, 90%. A colourless oil. IR (neat)  $\nu$  3004, 2984, 2947, 1716, 1449, 1437, 1275, 1267, 1151, 1114, 1083, 764, 750  $\text{cm}^{-1}$ ;  $^1\text{H}$  NMR (400 MHz,  $\text{CDCl}_3$ , TMS)  $\delta$  3.87 (s, 3H), 4.07 (s, 2H), 7.40-7.45 (m, 5H), 7.89 (s, 1H);  $^{13}\text{C}$  NMR (100 MHz,  $\text{CDCl}_3$ , TMS)  $\delta$  27.0 (q,  $J$  = 2.2 Hz), 52.5, 125.8, 128.8, 129.2, 129.5, 130.6 (q,  $J$  = 304.6 Hz), 134.1, 143.6, 166.8;  $^{19}\text{F}$  NMR (376 MHz,  $\text{CDCl}_3$ ,  $\text{CFC}_3$ )  $\delta$  -41.9; HRMS (EI) Calcd. for  $\text{C}_{12}\text{H}_{11}\text{F}_3\text{O}_2\text{S}$  requires ( $\text{M}^+$ ): 276.0432, Found: 276.0426.

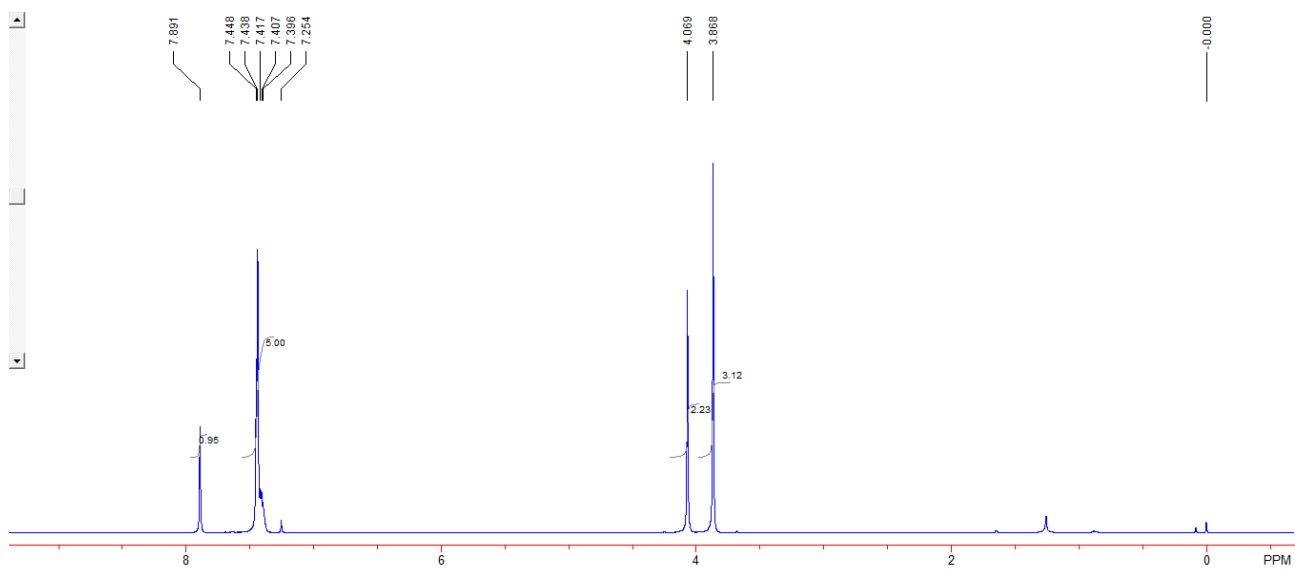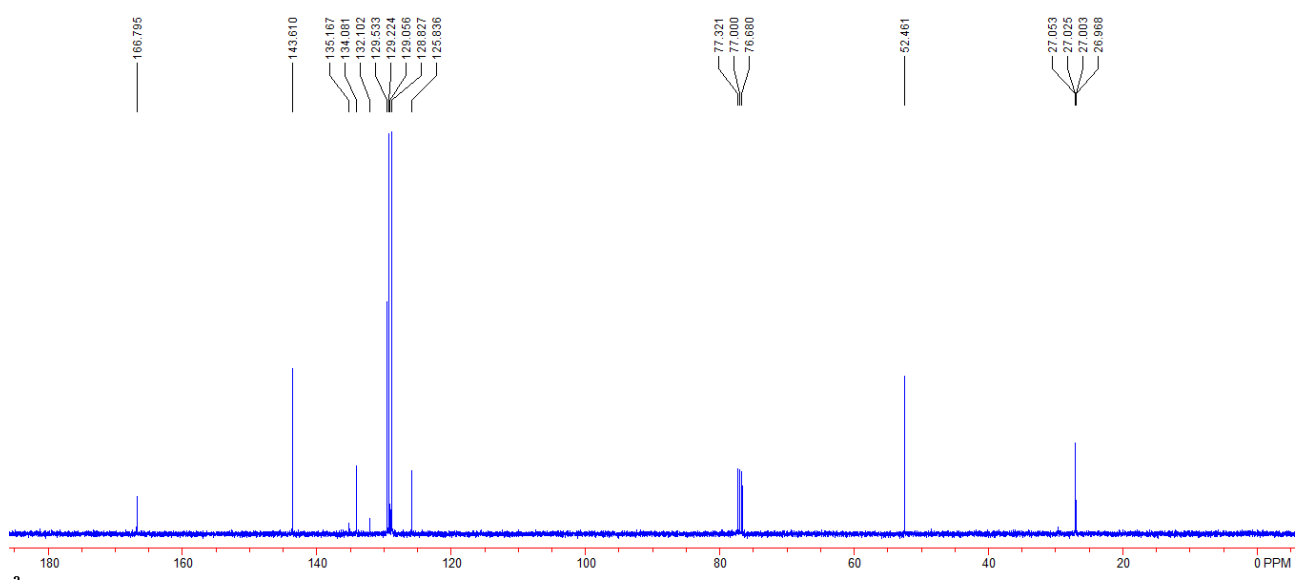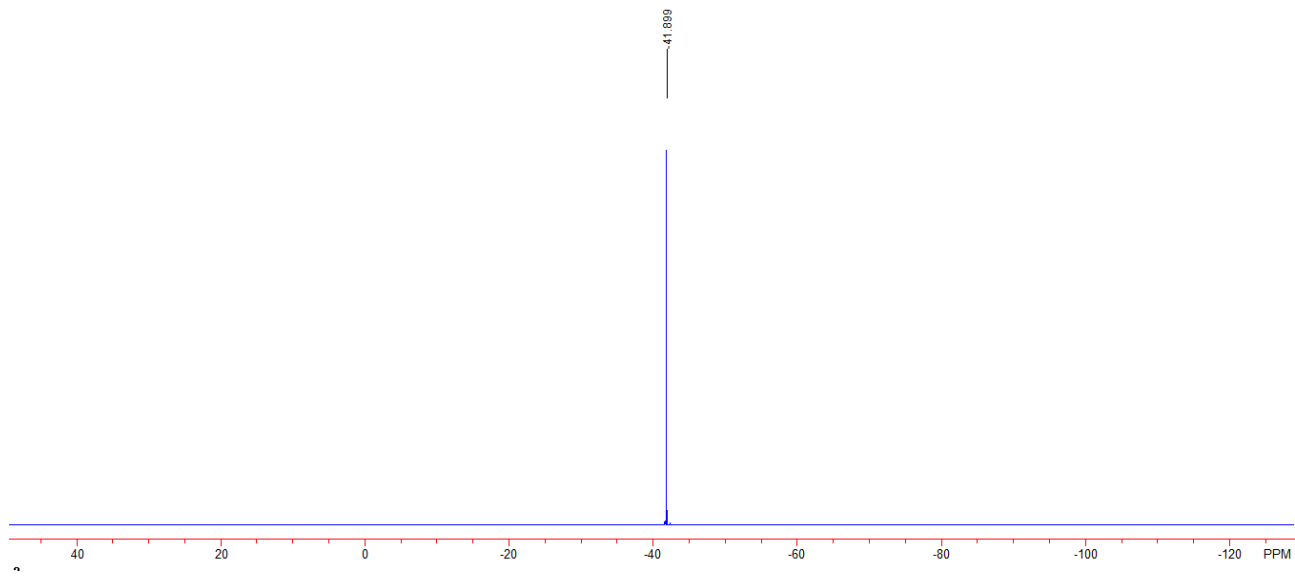

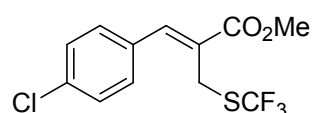

**Compound 3b:** Yield: 58 mg, 93%. A white solid. m. p.: 65-67 °C. IR (neat)  $\nu$  3004, 2964, 2850, 1717, 1491, 1437, 1276, 1262, 1153, 1113, 1081, 764, 750  $\text{cm}^{-1}$ ;  $^1\text{H}$  NMR (400 MHz,  $\text{CDCl}_3$ , TMS)  $\delta$  3.87 (s, 3H), 4.03 (s, 2H), 7.20-7.35 (m, 4H), 7.38 (d,  $J = 8.8$  Hz, 2H), 7.42 (d,  $J = 8.8$  Hz, 2H), 7.83 (s, 1H);  $^{13}\text{C}$  NMR (100 MHz,  $\text{CDCl}_3$ , TMS)  $\delta$  26.9 (q,  $J = 2.7$  Hz), 52.5, 126.4, 129.1, 130.48 (q,  $J = 305.6$  Hz), 130.50, 132.5, 135.6, 142.2, 166.5;  $^{19}\text{F}$  NMR (376 MHz,  $\text{CDCl}_3$ ,  $\text{CFCl}_3$ )  $\delta$  -41.9; HRMS (EI) Calcd. for  $\text{C}_{12}\text{H}_{10}\text{ClF}_3\text{O}_2\text{S}$  requires ( $\text{M}^+$ ): 310.0042, Found: 310.0049

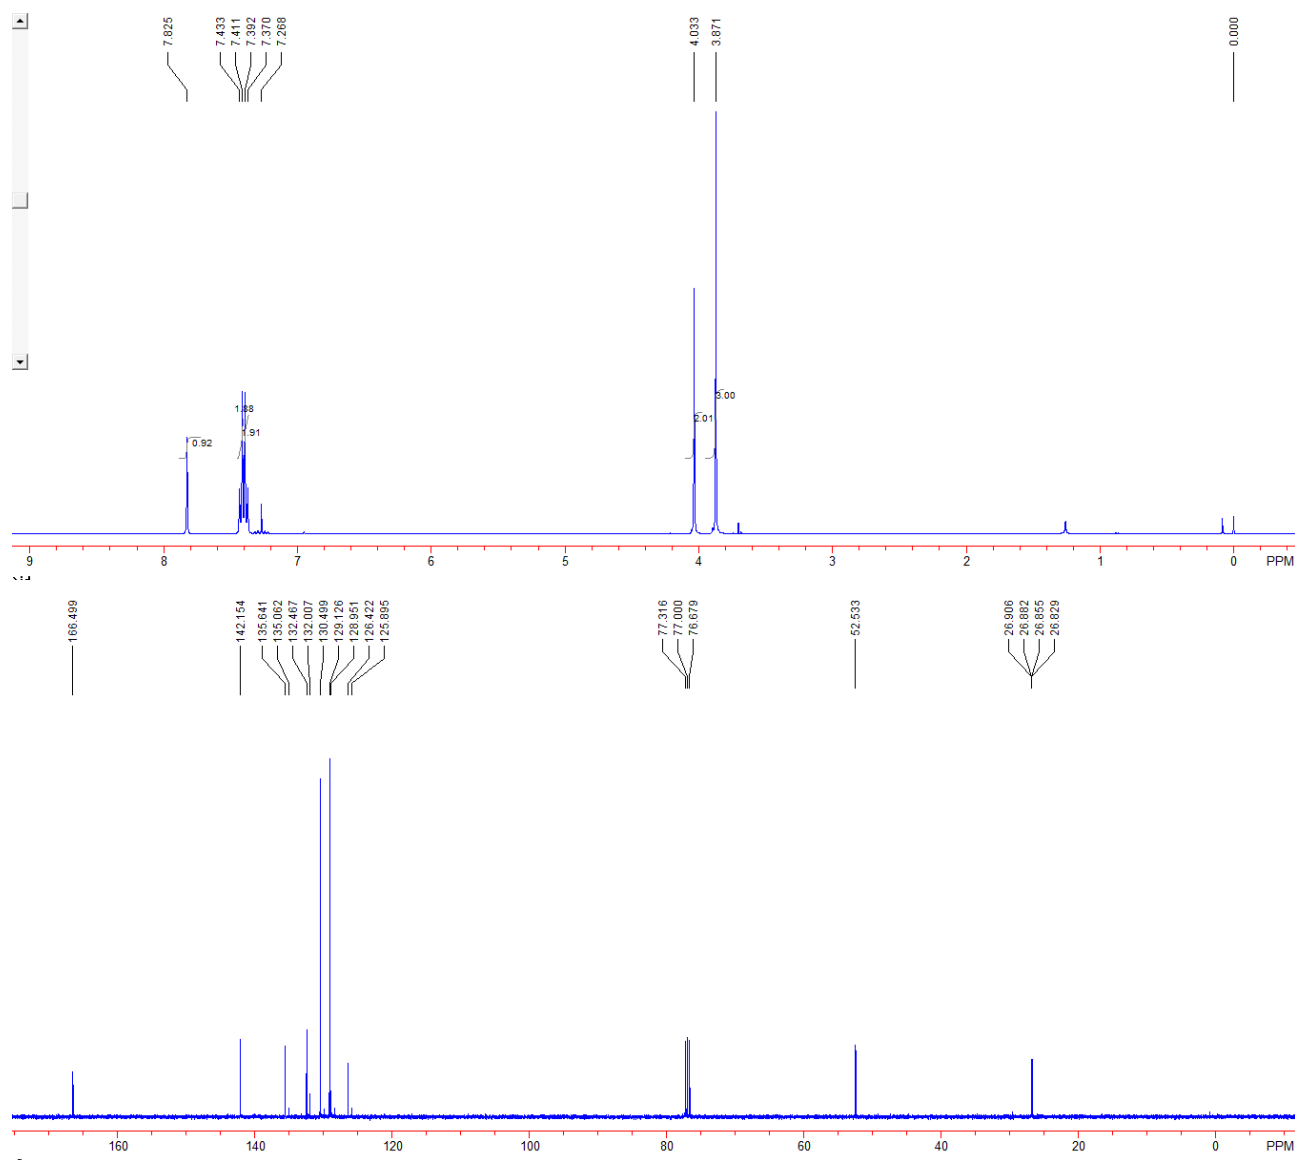

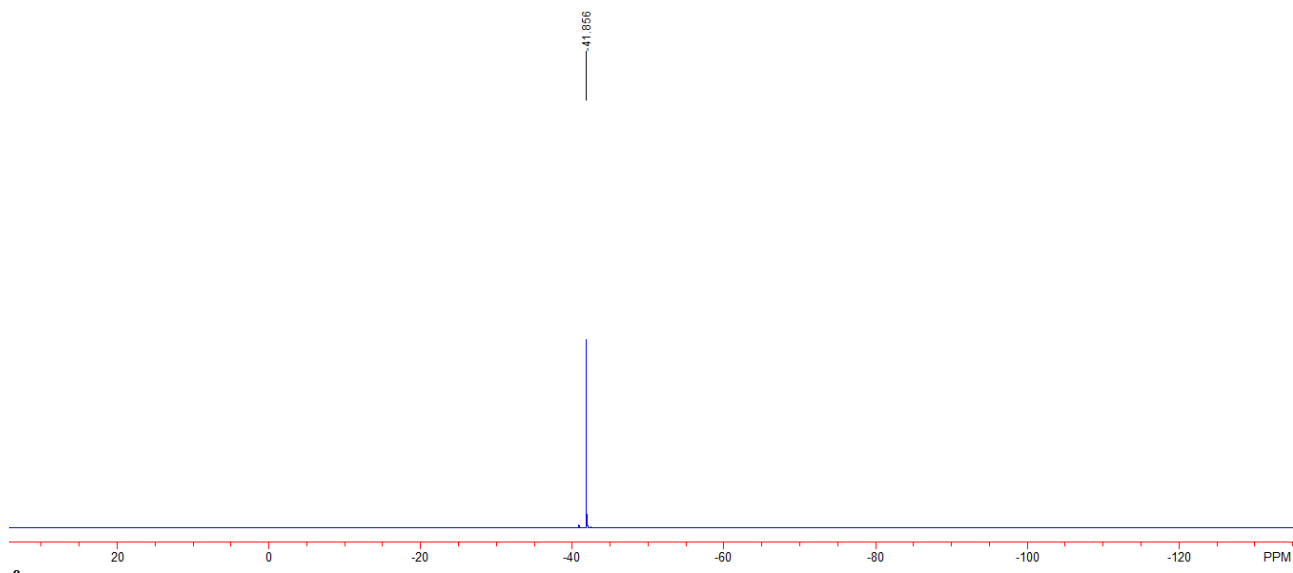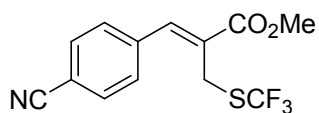

**Compound 3c:** Yield: 55 mg, 91%. A white solid. m. p.: 61-62 °C. IR (neat)  $\nu$  3008, 2960, 2915, 2850, 2230, 1717, 1438, 1275, 1267, 1152, 1112, 1082, 764, 750  $\text{cm}^{-1}$ ;  $^1\text{H}$  NMR (400 MHz,  $\text{CDCl}_3$ , TMS)  $\delta$  3.90 (s, 3H), 3.99 (s, 2H), 7.53 (d,  $J = 8.0$  Hz, 2H), 7.75 (d,  $J = 8.0$  Hz, 2H), 7.87 (s, 1H);  $^{13}\text{C}$  NMR (100 MHz,  $\text{CDCl}_3$ , TMS)  $\delta$  26.5 (q,  $J = 2.7$  Hz), 52.7, 112.8, 118.1, 129.0, 129.5, 130.3 (q,  $J = 305.8$  Hz), 132.5, 138.6, 140.8, 166.0;  $^{19}\text{F}$  NMR (376 MHz,  $\text{CDCl}_3$ ,  $\text{CFCl}_3$ )  $\delta$  -41.8; HRMS (EI) Calcd. for  $\text{C}_{13}\text{H}_{10}\text{F}_3\text{NO}_2\text{S}$  requires ( $\text{M}^+$ ): 301.0384, Found: 301.0383.

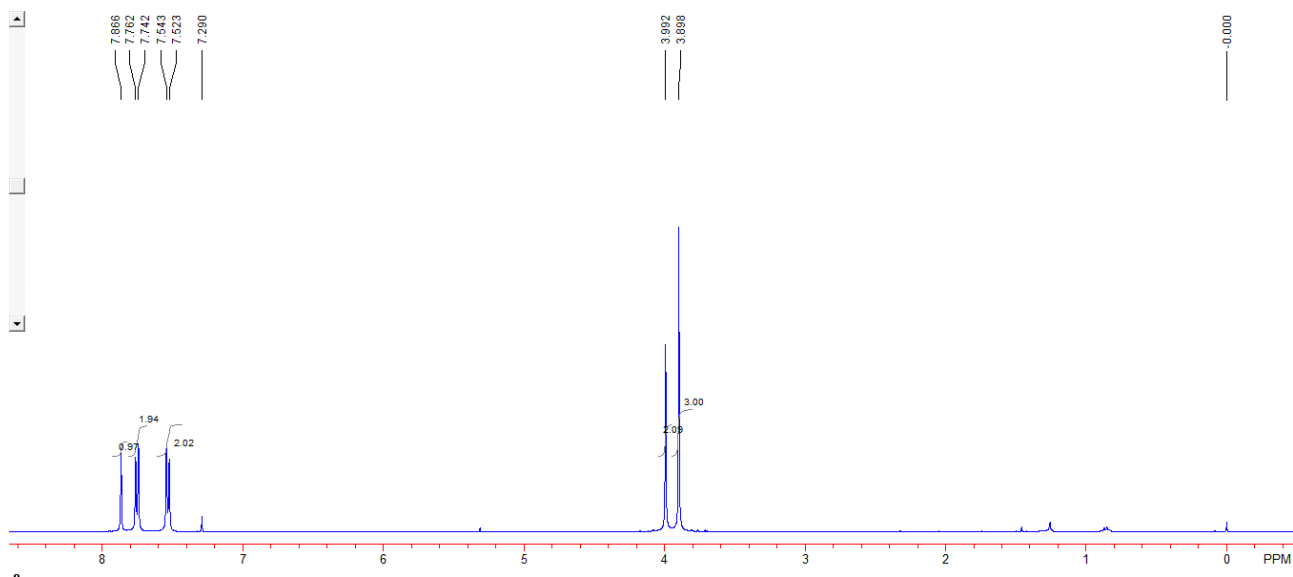

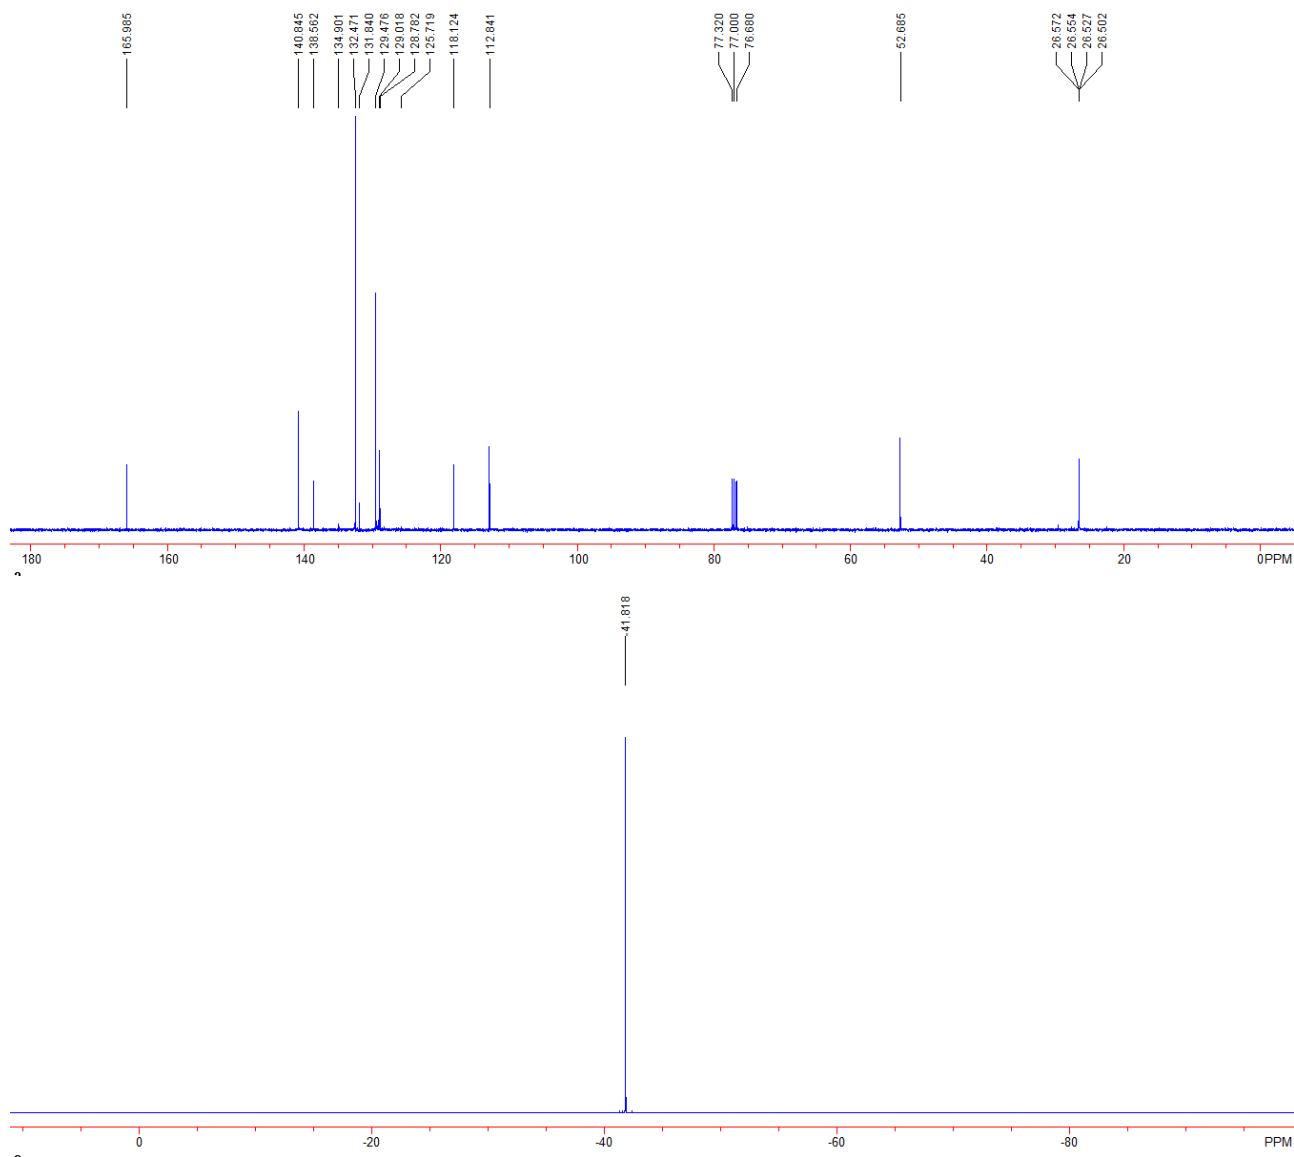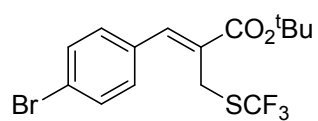

**Compound 3d:** Yield: 40 mg, 50%. A white solid. m. p.: 48-50 °C. IR (neat)  $\nu$  2979, 2918, 2849, 1711, 1488, 1369, 1287, 1257, 1153, 1114, 1074, 1011, 849, 811, 756  $\text{cm}^{-1}$ ;  $^1\text{H}$  NMR (400 MHz,  $\text{CDCl}_3$ , TMS)  $\delta$  1.56 (s, 9H), 3.97 (s, 2H), 7.30 (d,  $J = 8.0$  Hz, 2H), 7.57 (d,  $J = 8.0$  Hz, 2H), 7.71 (s, 1H);  $^{13}\text{C}$  NMR (100 MHz,  $\text{CDCl}_3$ , TMS)  $\delta$  27.0 (q,  $J = 2.3$  Hz), 28.0, 82.2, 123.6, 128.2, 130.59 (q,  $J = 305.6$  Hz), 130.61, 132.0, 133.3, 141.1, 165.1;  $^{19}\text{F}$  NMR (376 MHz,  $\text{CDCl}_3$ ,  $\text{CFCl}_3$ )  $\delta$  -42.2; HRMS (EI) Calcd. for  $\text{C}_{15}\text{H}_{16}\text{BrF}_3\text{O}_2\text{S}$  requires ( $\text{M}^+$ ): 396.0006, Found: 395.9998.

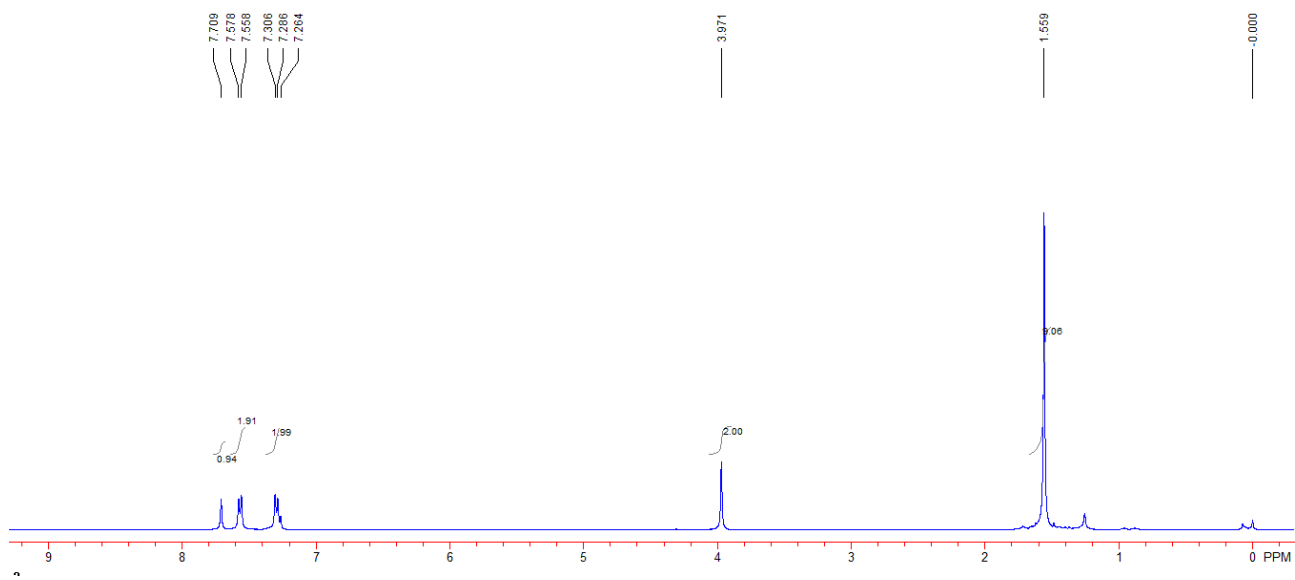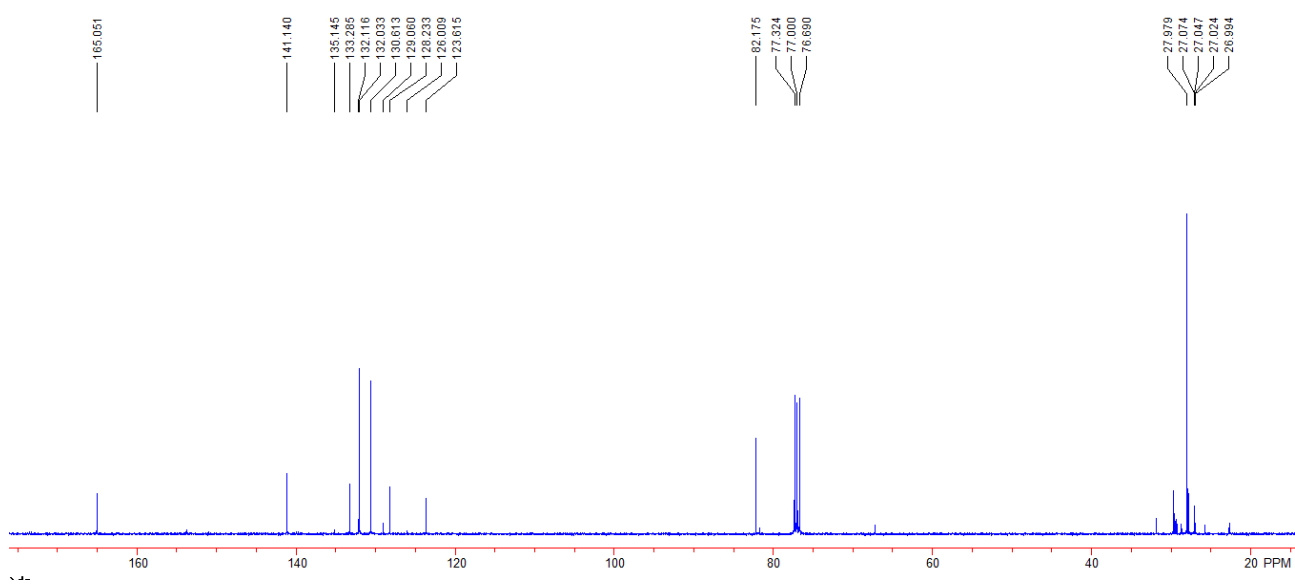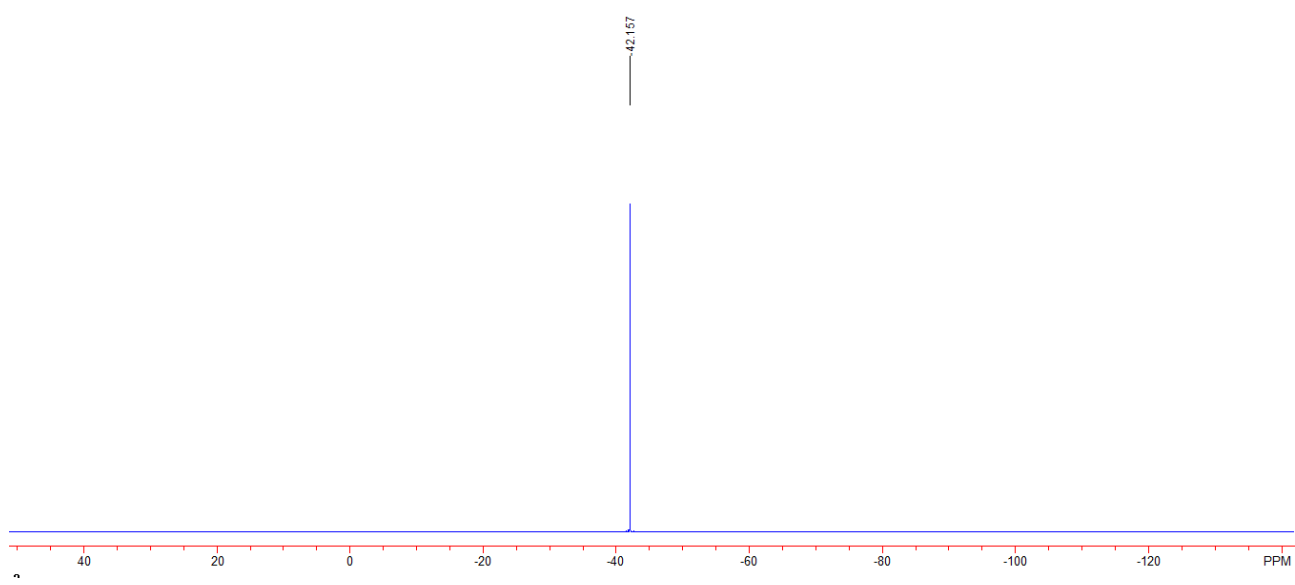

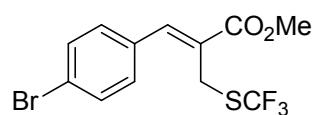

**Compound 3e:** Yield: 67 mg, 94%. A white solid. m. p.: 40-42 °C. IR (neat)  $\nu$  2954, 2919, 2850, 1719, 1634, 1587, 1488, 1437, 1281, 1154, 1115, 1075, 833, 806  $\text{cm}^{-1}$ ;  $^1\text{H}$  NMR (400 MHz,  $\text{CDCl}_3$ , TMS)  $\delta$  3.87 (s, 3H), 4.03 (s, 2H), 7.31 (d,  $J = 8.0$  Hz, 2H), 7.58 (d,  $J = 8.0$  Hz, 2H), 7.80 (s, 1H);  $^{13}\text{C}$  NMR (100 MHz,  $\text{CDCl}_3$ , TMS)  $\delta$  26.9 (q,  $J = 2.5$  Hz), 52.6, 124.0, 126.5, 130.4 (q,  $J = 305.4$  Hz), 130.7, 132.1, 132.9, 142.2, 166.5;  $^{19}\text{F}$  NMR (376 MHz,  $\text{CDCl}_3$ ,  $\text{CFCl}_3$ )  $\delta$  -41.8; HRMS (EI) Calcd. for  $\text{C}_{12}\text{H}_{10}\text{BrF}_3\text{O}_2\text{S}$  requires ( $\text{M}^+$ ): 353.9537, Found: 353.9542.

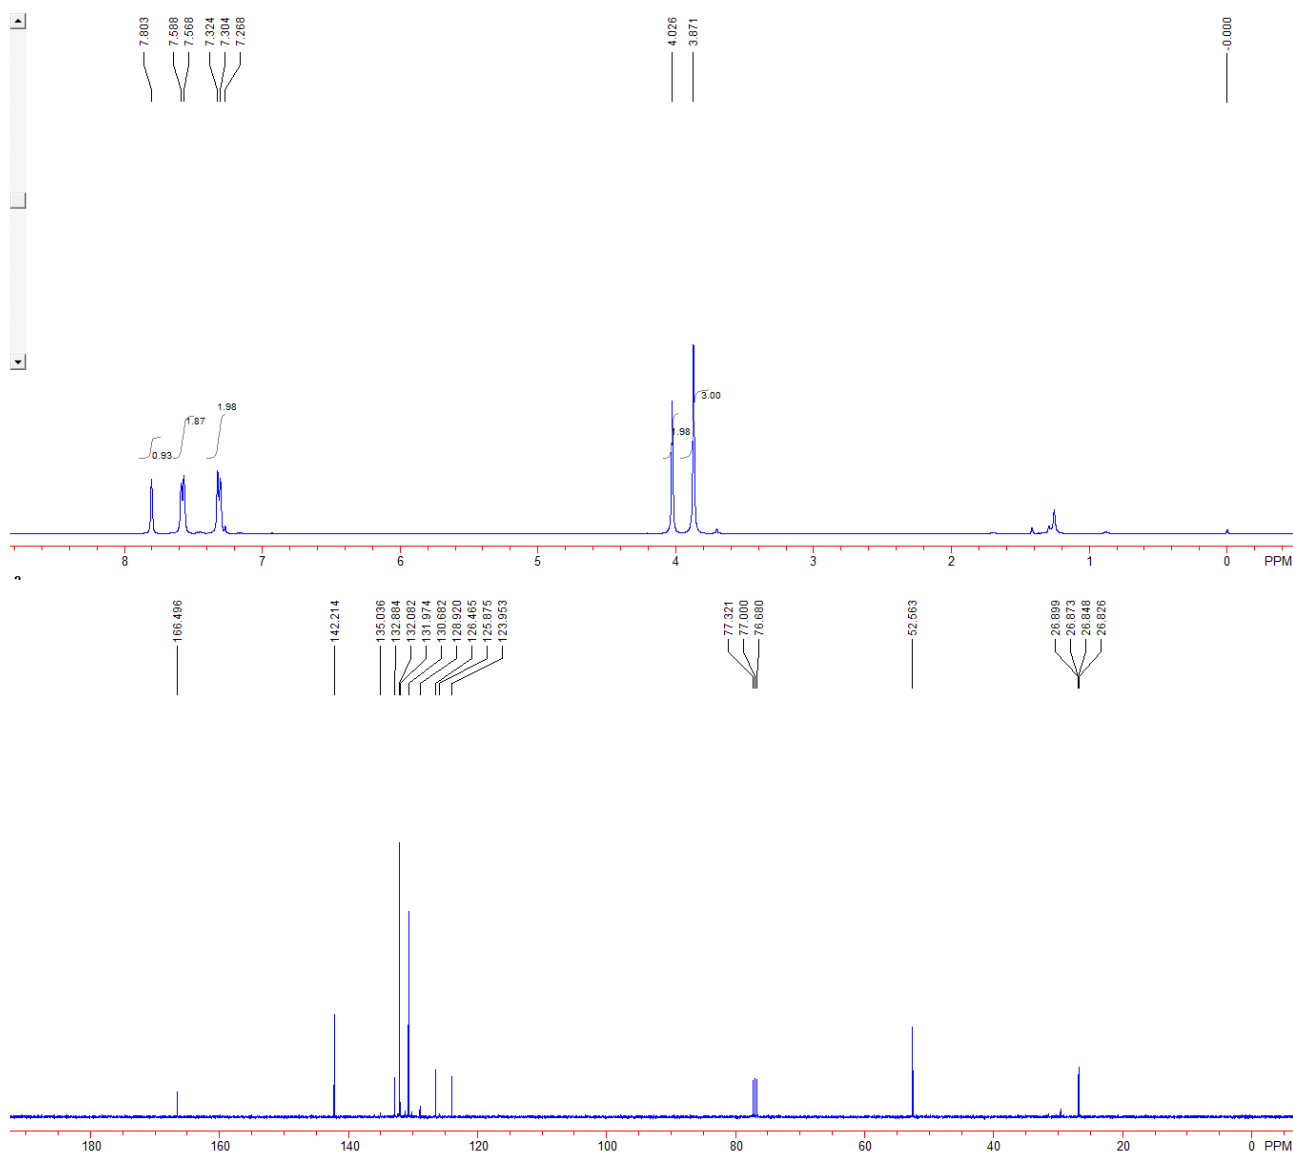



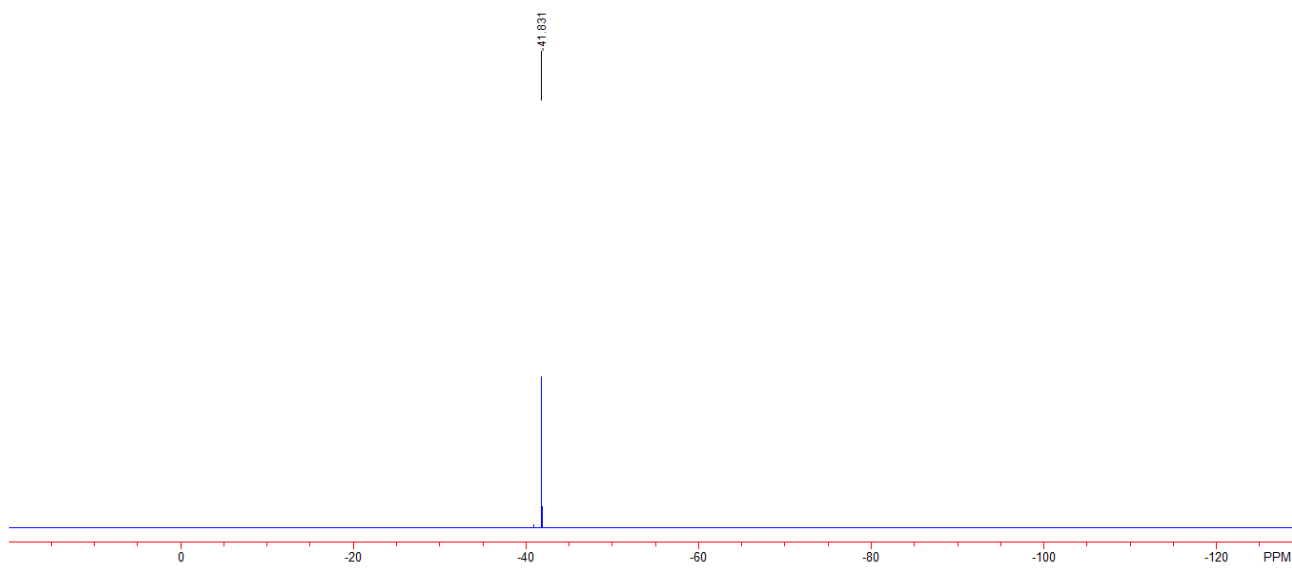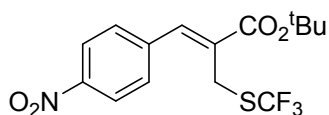

**Compound 3f:** Yield: 44 mg, 61%. Z:E = 16.3:1. A white solid. m. p.: 78-80 °C. IR (neat)  $\nu$  2984, 2927, 2854, 1712, 1600, 1523, 1370, 1346, 1277, 1260, 1153, 1113, 852, 764, 750  $\text{cm}^{-1}$ ;  $^1\text{H}$  NMR (400 MHz,  $\text{CDCl}_3$ , TMS)  $\delta$  1.35 (s, 9H, minor isomer), 1.58 (s, 9H), 3.88 (s, 2H, minor isomer), 3.94 (s, 2H), 6.98 (s, 1H, minor isomer), 7.43 (d,  $J = 8.4$  Hz, 2H, minor isomer), 7.57 (d,  $J = 8.4$  Hz, 2H), 7.80 (s, 1H), 8.21 (d,  $J = 8.8$  Hz, 2H, minor isomer), 8.30 (d,  $J = 8.8$  Hz, 2H);  $^{13}\text{C}$  NMR (100 MHz,  $\text{CDCl}_3$ , TMS)  $\delta$  26.7 (q,  $J = 2.1$  Hz), 27.7 (minor isomer), 27.9, 82.7, 82.9 (minor isomer), 123.2 (minor isomer), 124.0, 129.2 (minor isomer), 129.7, 130.4 (q,  $J = 305.7$  Hz), 131.2, 133.4 (minor isomer), 135.5 (minor isomer), 139.4, 140.9, 142.4 (minor isomer), 147.8, 164.4, 164.7 (minor isomer);  $^{19}\text{F}$  NMR (376 MHz,  $\text{CDCl}_3$ ,  $\text{CFCl}_3$ )  $\delta$  -40.9(minor), -41.8 (major); HRMS (EI) Calcd. for  $\text{C}_{15}\text{H}_{16}\text{F}_3\text{NO}_4\text{S}$  requires ( $\text{M}^+$ ): 363.0752, Found: 363.0748.

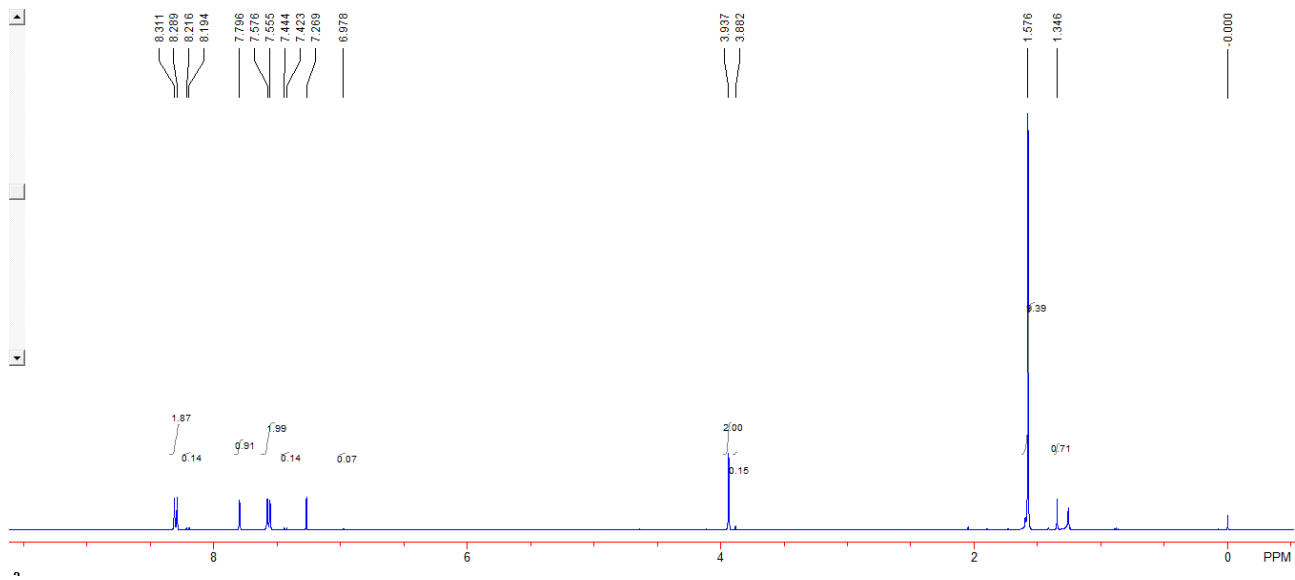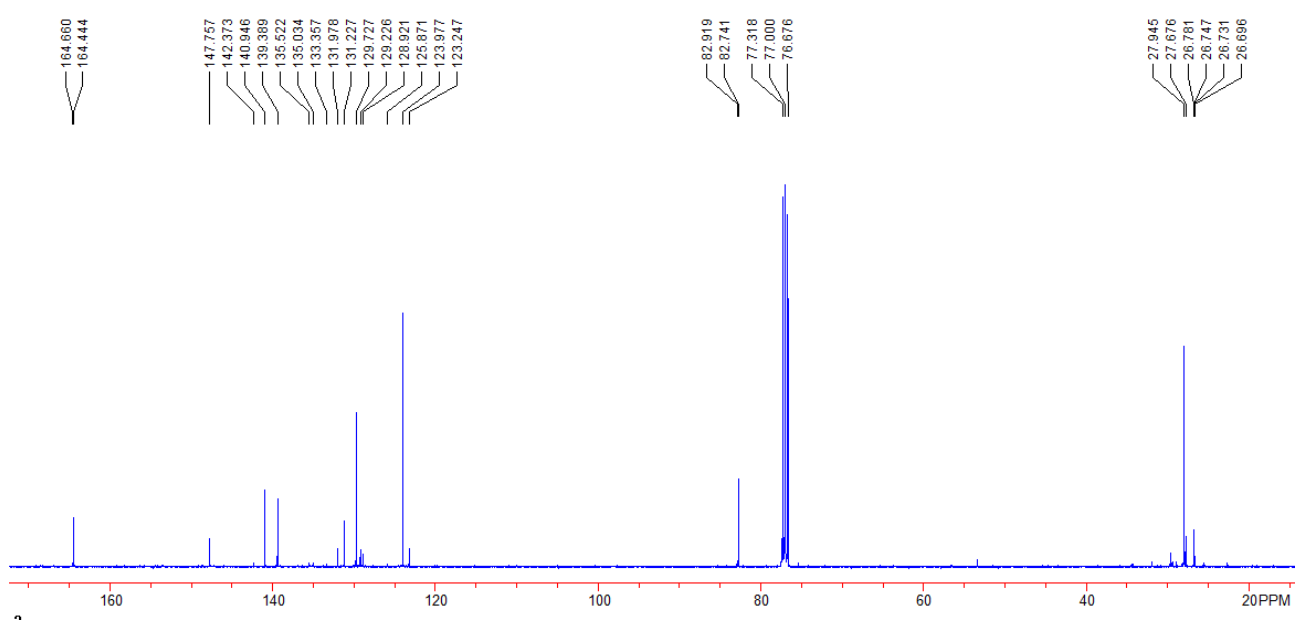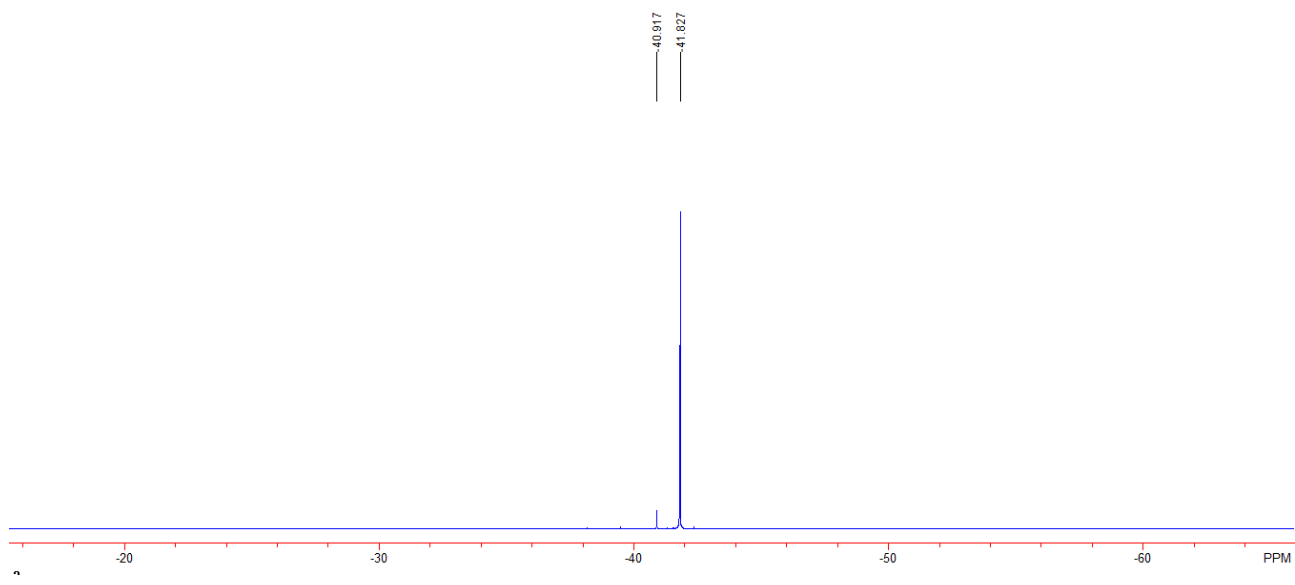

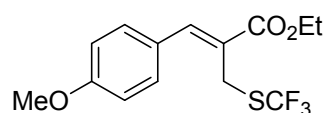

**Compound 3g:** Yield: 30 mg, 47%. A white solid. m. p.: 40-42 °C. IR (neat)  $\nu$  2964, 2931, 2838, 1706, 1605, 1512, 1306, 1259, 1175, 1152, 1111, 1081, 1030, 828  $\text{cm}^{-1}$ ;  $^1\text{H}$  NMR (400 MHz,  $\text{CDCl}_3$ , TMS)  $\delta$  1.37 (t,  $J = 7.2$  Hz, 3H), 3.86 (s, 3H), 4.12 (s, 2H), 4.31 (q,  $J = 7.2$  Hz, 2H), 6.97 (d,  $J = 8.8$  Hz, 2H), 7.46 (d,  $J = 8.8$  Hz, 2H), 7.83 (s, 1H);  $^{13}\text{C}$  NMR (100 MHz,  $\text{CDCl}_3$ , TMS)  $\delta$  14.2, 27.3 (q,  $J = 2.4$  Hz), 55.4, 61.4, 114.3, 123.2, 126.6, 130.7 (q,  $J = 305.9$  Hz), 131.4, 143.3, 160.7, 166.6;  $^{19}\text{F}$  NMR (376 MHz,  $\text{CDCl}_3$ ,  $\text{CFCl}_3$ )  $\delta$  -41.9; HRMS (EI) Calcd. for  $\text{C}_{14}\text{H}_{15}\text{F}_3\text{O}_3\text{S}$  requires ( $\text{M}^+$ ): 320.0694, Found: 320.0696.

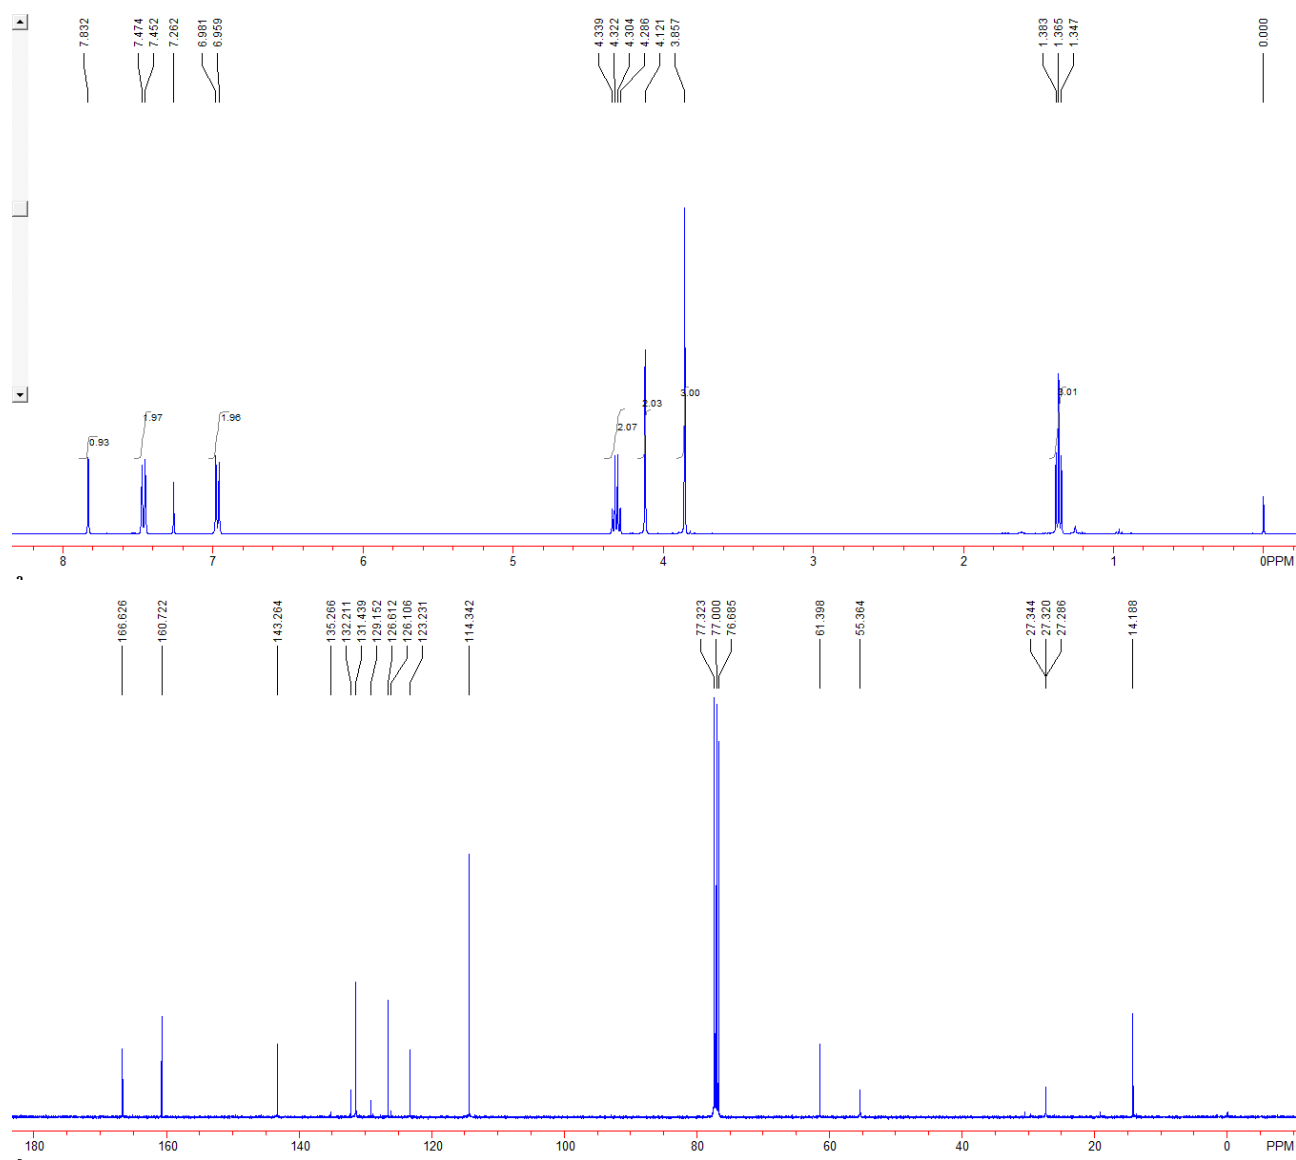

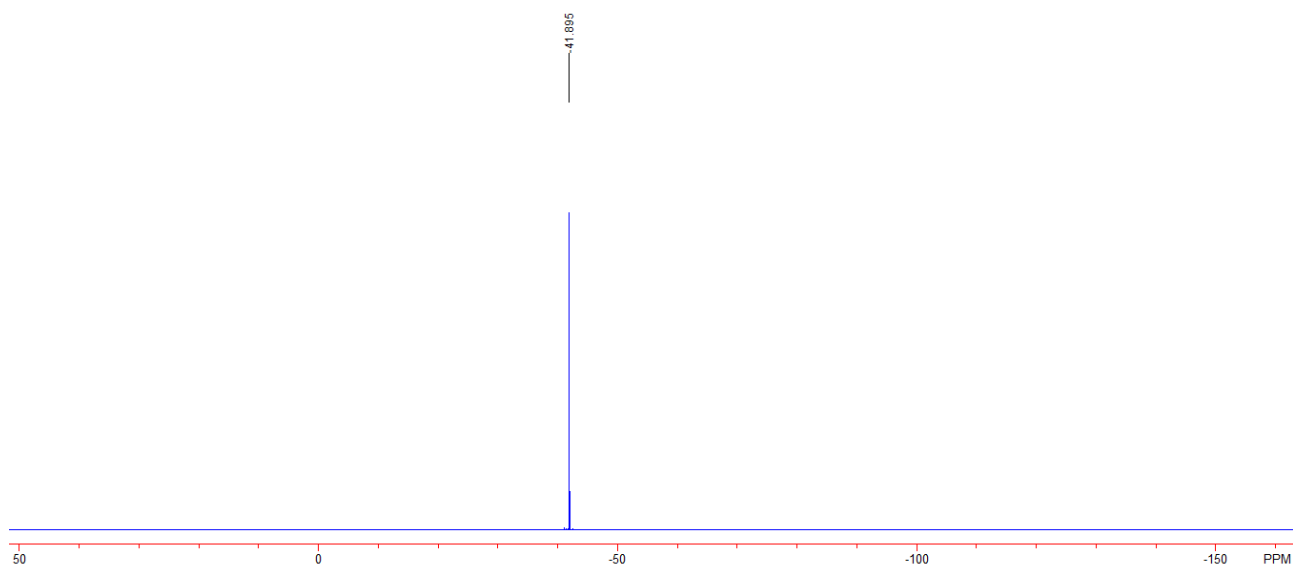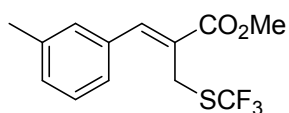

**Compound 3h:** Yield: 46 mg, 80%. A colourless oil. IR (neat)  $\nu$  3008, 2960, 2927, 2846, 1715, 1438, 1276, 1261, 1243, 1151, 1112, 1082, 764, 750  $\text{cm}^{-1}$ ;  $^1\text{H}$  NMR (400 MHz,  $\text{CDCl}_3$ , TMS)  $\delta$  2.39 (s, 3H), 3.86 (s, 3H), 4.07 (s, 2H), 7.20-7.35 (m, 4H), 7.86 (s, 1H);  $^{13}\text{C}$  NMR (100 MHz,  $\text{CDCl}_3$ , TMS)  $\delta$  21.3, 27.1 (q,  $J = 2.5$  Hz), 52.4, 125.5, 126.4, 128.7, 129.9, 130.4, 130.6 (q,  $J = 305.6$  Hz), 134.0, 138.6, 143.89, 143.90, 166.9;  $^{19}\text{F}$  NMR (376 MHz,  $\text{CDCl}_3$ ,  $\text{CFCl}_3$ )  $\delta$  -41.9; HRMS (EI) Calcd. for  $\text{C}_{13}\text{H}_{13}\text{F}_3\text{O}_2\text{S}$  requires ( $\text{M}^+$ ): 290.0588, Found: 290.0584.

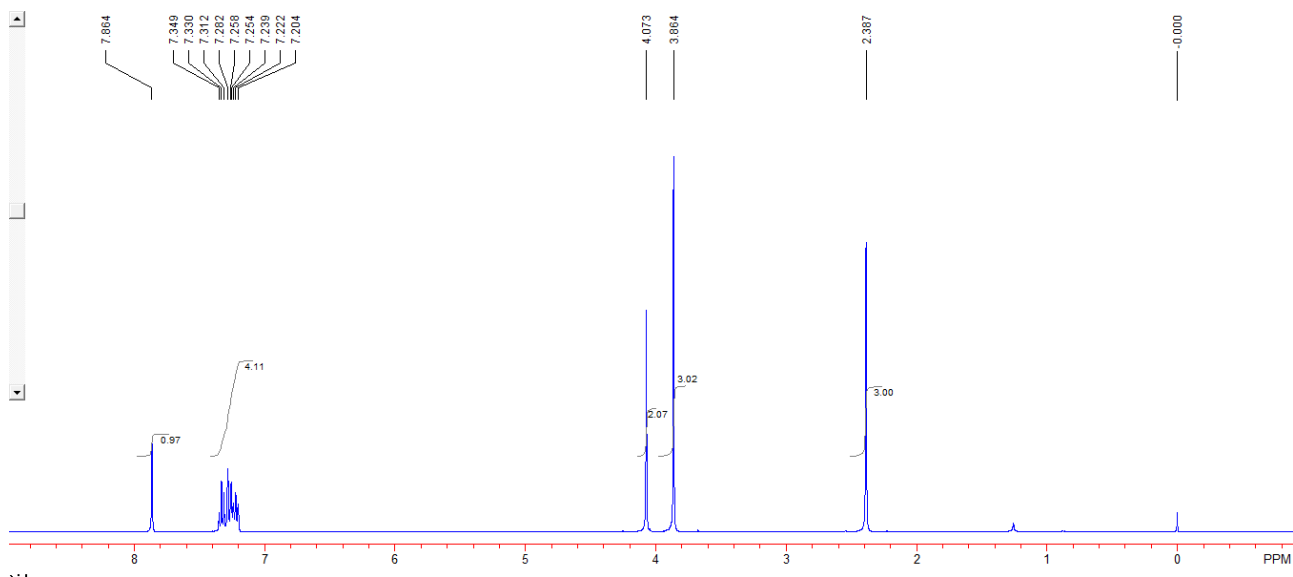

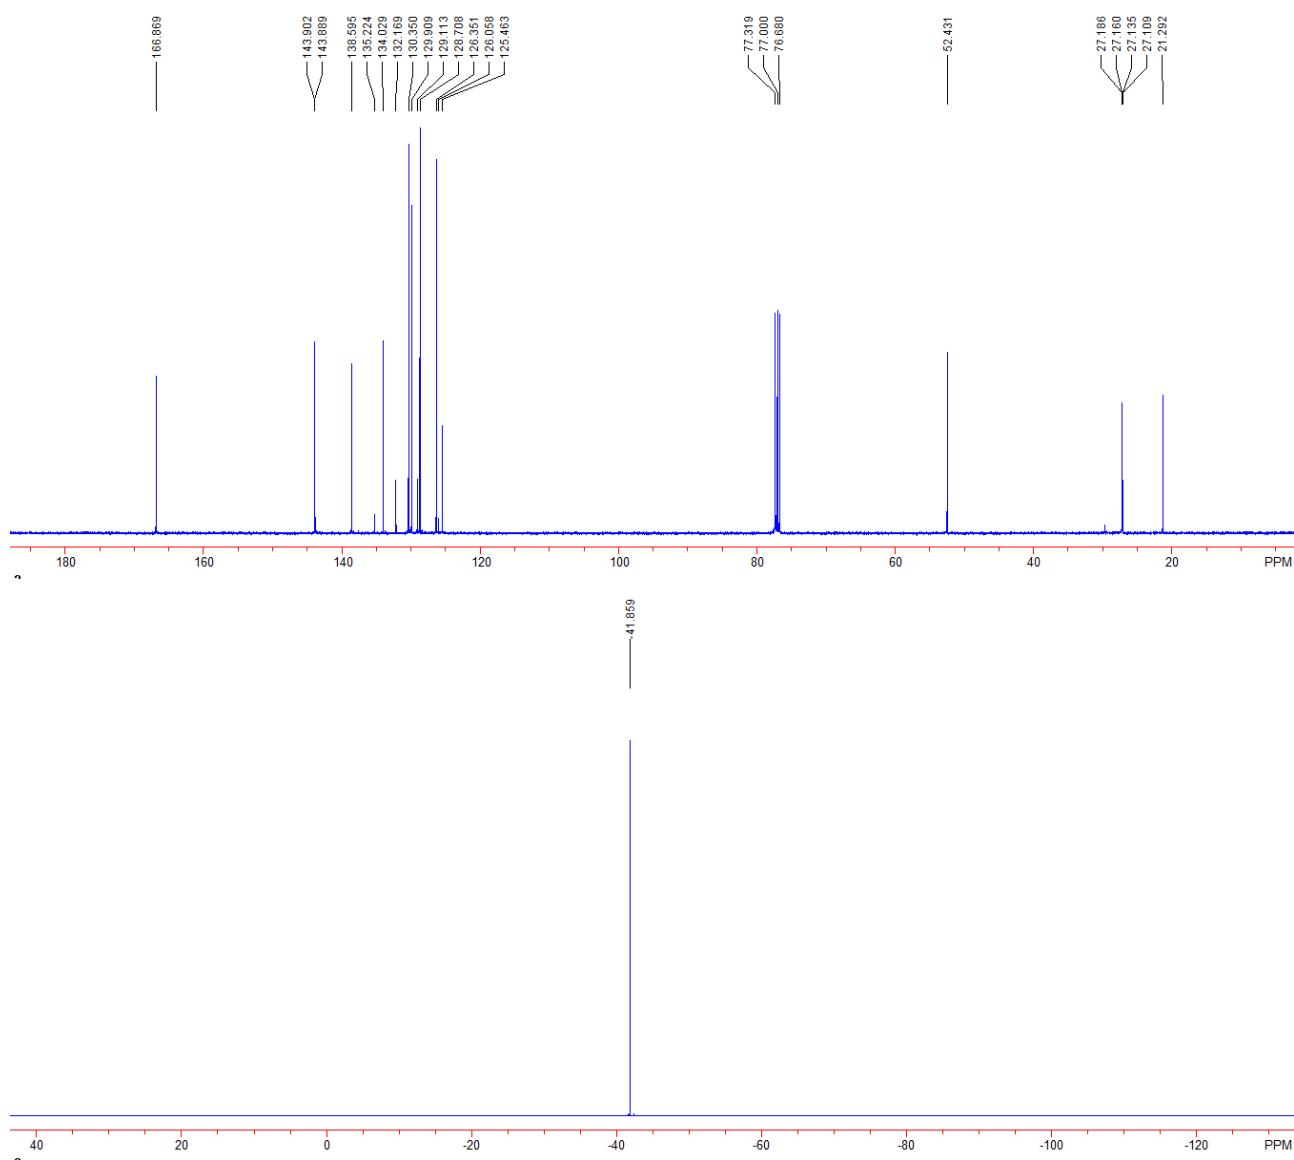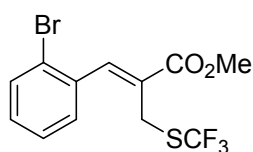

**Compound 3i:** Yield: 64 mg, 90%. A white solid. m. p.: 30-32 °C. IR (neat)  $\nu$  2955, 2919, 2846, 1717, 1466, 1436, 1288, 1264, 1206, 1151, 1111, 1083, 1046, 1027, 783, 755  $\text{cm}^{-1}$ ;  $^1\text{H}$  NMR (400 MHz,  $\text{CDCl}_3$ , TMS)  $\delta$  3.892 (s, 3H), 3.897 (s, 2H), 7.24-7.30 (m, 1H), 7.38-7.41 (m, 2H), 7.65 (d,  $J$  = 8.0 Hz, 1H), 7.89 (s, 1H);  $^{13}\text{C}$  NMR (100 MHz,  $\text{CDCl}_3$ , TMS)  $\delta$  26.8 (q,  $J$  = 2.6 Hz), 52.6, 123.9, 127.5, 128.2, 129.7, 130.5 (q,  $J$  = 305.3 Hz), 130.6, 133.0, 134.6, 142.4, 166.3;  $^{19}\text{F}$  NMR (376 MHz,  $\text{CDCl}_3$ ,  $\text{CFCl}_3$ )  $\delta$  -42.2; HRMS (EI) Calcd. for  $\text{C}_{12}\text{H}_{10}\text{BrF}_3\text{O}_2\text{S}$  requires ( $\text{M}^+$ -OMe): 322.9353,

Found: 322.9348.

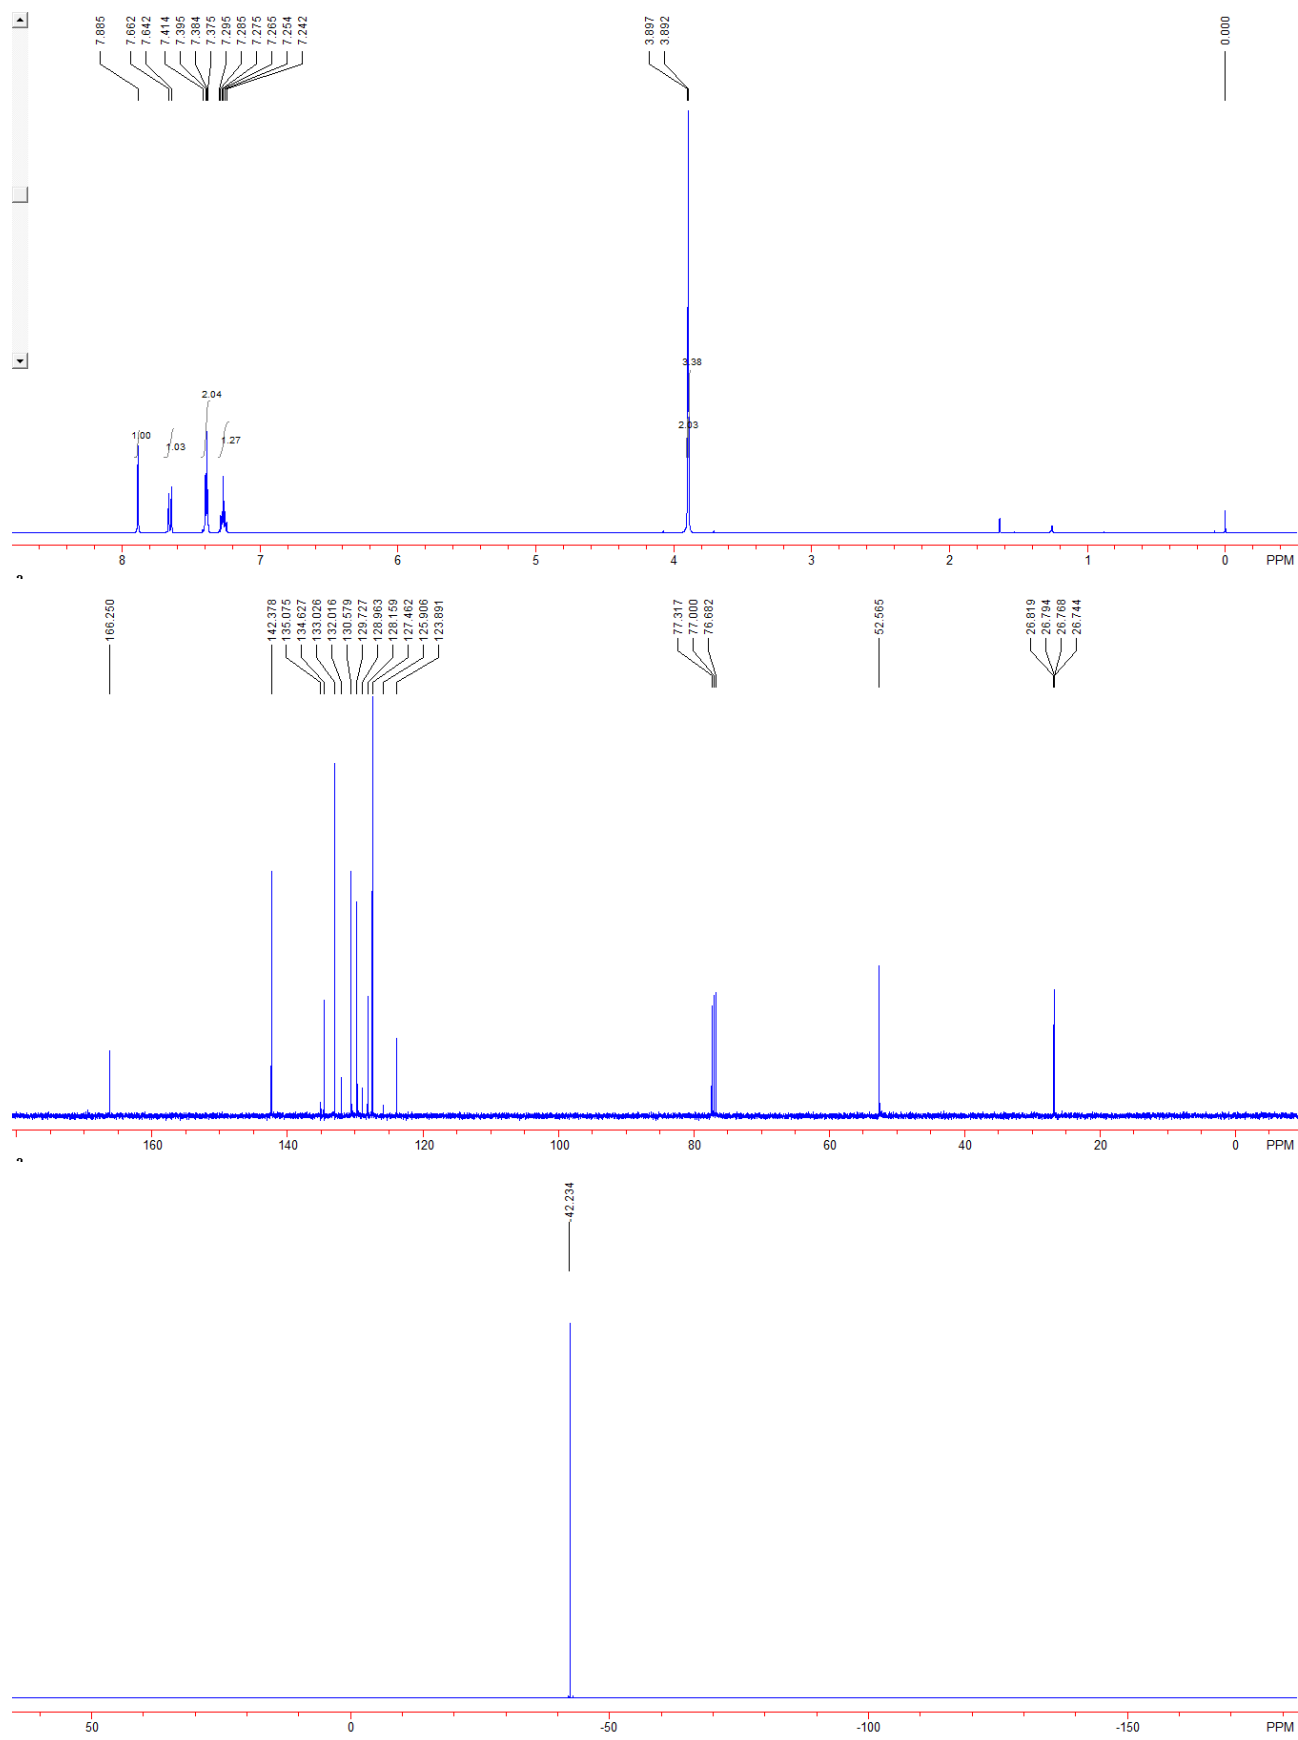

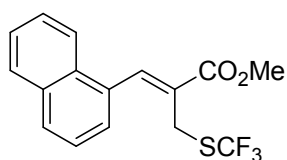

**Compound 3j:** Yield: 59 mg, 91%. A white solid. m. p.: 36-38 °C. IR (neat)  $\nu$  3065, 3004, 2955, 2850, 1716, 1508, 1437, 1342, 1279, 1261, 1197, 1149, 1111, 1074, 803, 782, 755  $\text{cm}^{-1}$ ;  $^1\text{H}$  NMR (400 MHz,  $\text{CDCl}_3$ , TMS)  $\delta$  3.92 (s, 3H), 3.94 (s, 2H), 7.46-7.54 (m, 4H), 7.84-7.89 (m, 3H), 8.39 (s, 1H);  $^{13}\text{C}$  NMR (100 MHz,  $\text{CDCl}_3$ , TMS)  $\delta$  27.1 (q,  $J = 2.5$  Hz), 52.5, 124.3, 125.1, 126.3, 126.4, 126.7, 128.6, 128.7, 129.7, 130.5 (q,  $J = 305.6$  Hz), 131.2, 131.3, 133.4, 142.0, 166.5;  $^{19}\text{F}$  NMR (376 MHz,  $\text{CDCl}_3$ ,  $\text{CFC}_3$ )  $\delta$  -41.8; HRMS (EI) Calcd. for  $\text{C}_{16}\text{H}_{13}\text{F}_3\text{O}_2\text{S}$  requires ( $\text{M}^+$ ): 326.0588, Found: 326.0587.

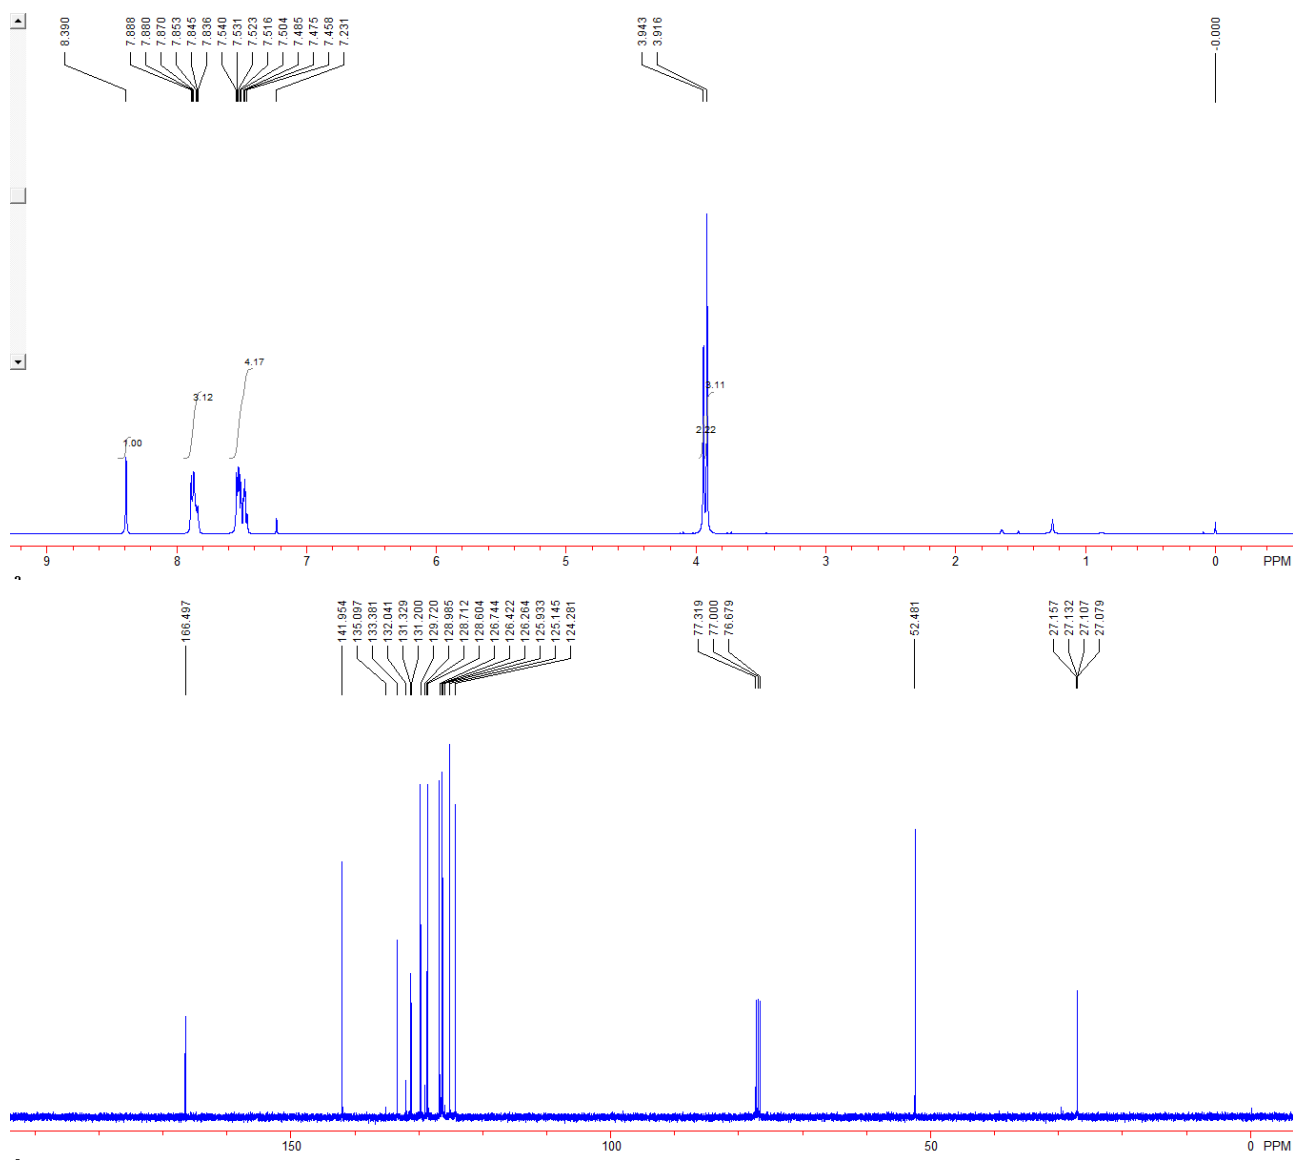

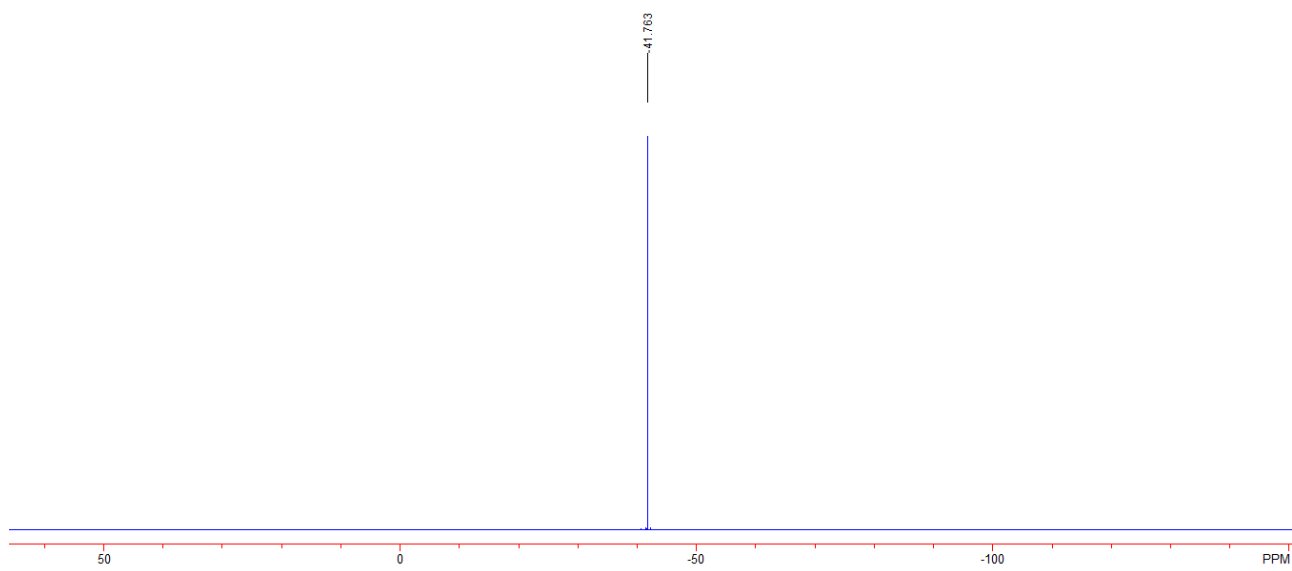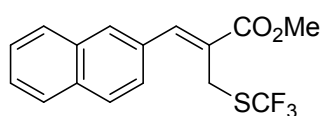

**Compound 3k:** Yield: 58 mg, 89%. A white solid. m. p.: 44-45 °C. IR (neat)  $\nu$  3061, 3004, 2951, 2923, 2846, 1712, 1623, 1437, 1276, 1261, 1152, 1112, 1083, 764, 750  $\text{cm}^{-1}$ ;  $^1\text{H}$  NMR (400 MHz,  $\text{CDCl}_3$ , TMS)  $\delta$  3.89 (s, 3H), 4.15 (s, 2H), 7.50-7.55 (m, 3H), 7.83-7.89 (m, 3H), 7.97 (s, 1H), 8.03 (s, 1H);  $^{13}\text{C}$  NMR (100 MHz,  $\text{CDCl}_3$ , TMS)  $\delta$  27.3 (q,  $J = 2.0$  Hz), 52.5, 125.7, 126.2, 126.8, 127.3, 127.7, 128.5, 128.6, 129.5, 130.6 (q,  $J = 306.2$  Hz), 131.5, 133.0, 133.4, 143.7, 166.8;  $^{19}\text{F}$  NMR (376 MHz,  $\text{CDCl}_3$ ,  $\text{CFC}_3$ )  $\delta$  -41.7; HRMS (EI) Calcd. for  $\text{C}_{16}\text{H}_{13}\text{F}_3\text{O}_2\text{S}$  requires ( $\text{M}^+$ ): 326.0588, Found: 326.0590.



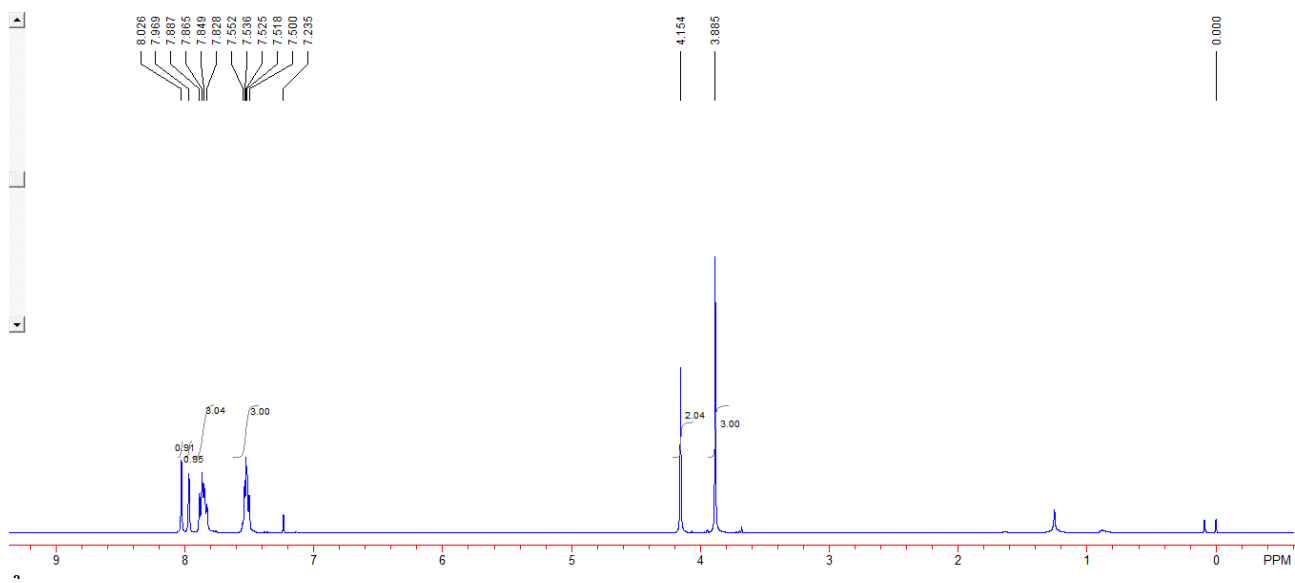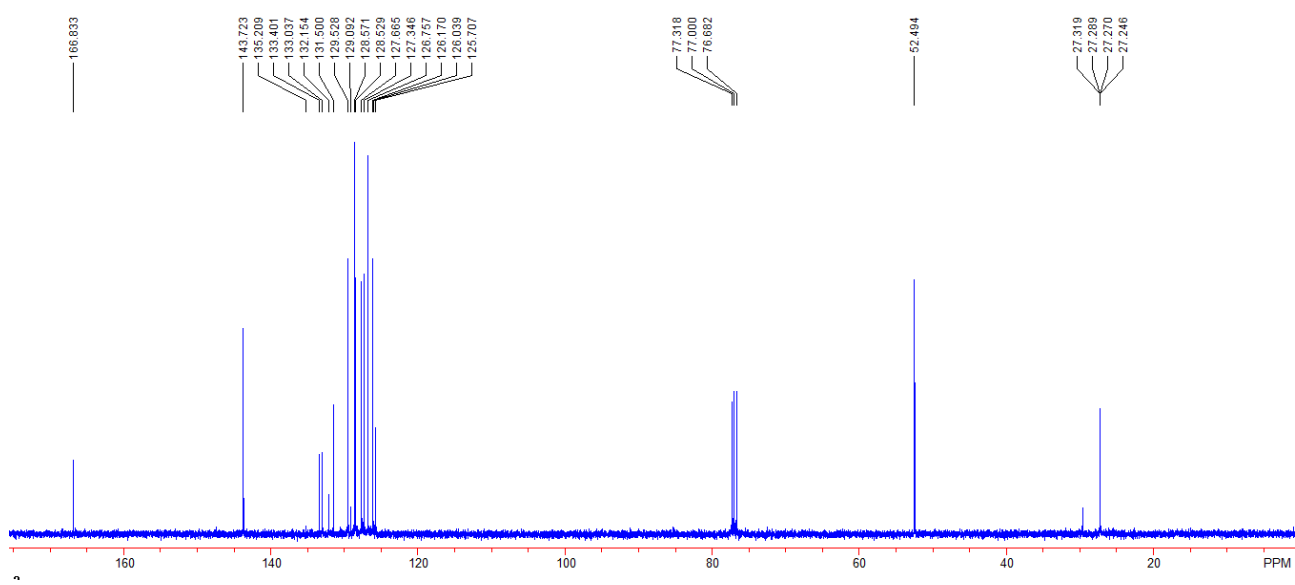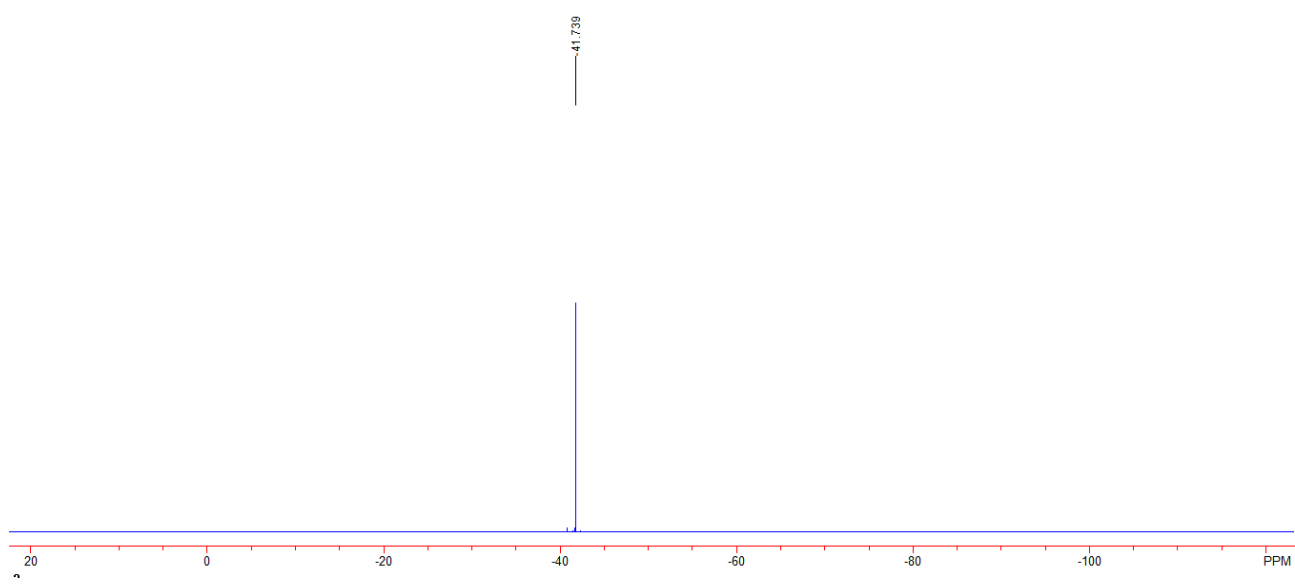

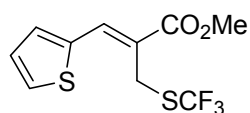

**Compound 3l:** Yield: 53 mg, 94%. A white solid. m. p.: 69-70 °C. IR (neat)  $\nu$  3008, 2984, 2951, 1710, 1618, 1435, 1417, 1344, 1276, 1257, 1210, 1113, 764, 750  $\text{cm}^{-1}$ ;  $^1\text{H}$  NMR (400 MHz,  $\text{CDCl}_3$ , TMS)  $\delta$  3.85 (s, 3H), 4.26 (s, 2H), 7.15 (t,  $J = 4.4$  Hz, 1H), 7.39 (d,  $J = 3.2$  Hz, 1H), 7.60 (d,  $J = 4.4$  Hz, 1H), 7.98 (s, 1H);  $^{13}\text{C}$  NMR (100 MHz,  $\text{CDCl}_3$ , TMS)  $\delta$  27.2 (q,  $J = 2.4$  Hz), 52.5, 121.5, 127.8, 130.7 (q,  $J = 306.0$  Hz), 131.2, 133.8, 135.4, 136.7, 166.8;  $^{19}\text{F}$  NMR (376 MHz,  $\text{CDCl}_3$ ,  $\text{CFCl}_3$ )  $\delta$  -41.6; HRMS (EI) Calcd. for  $\text{C}_{10}\text{H}_9\text{F}_3\text{O}_2\text{S}_2$  requires ( $\text{M}^+$ ): 281.9996, Found: 281.9997.

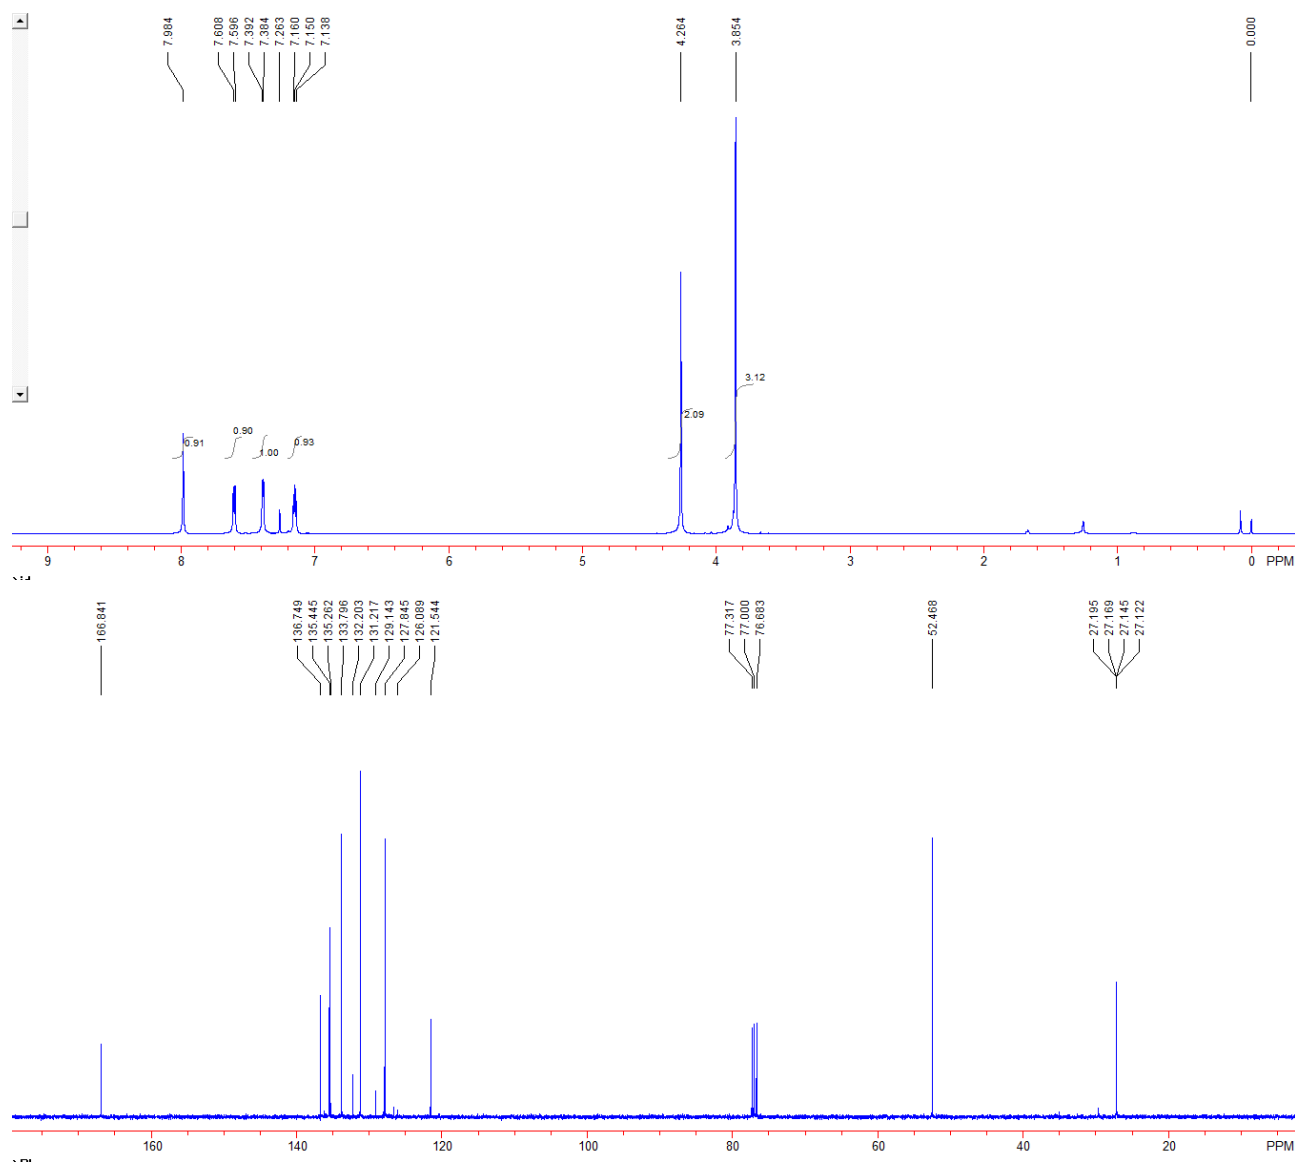

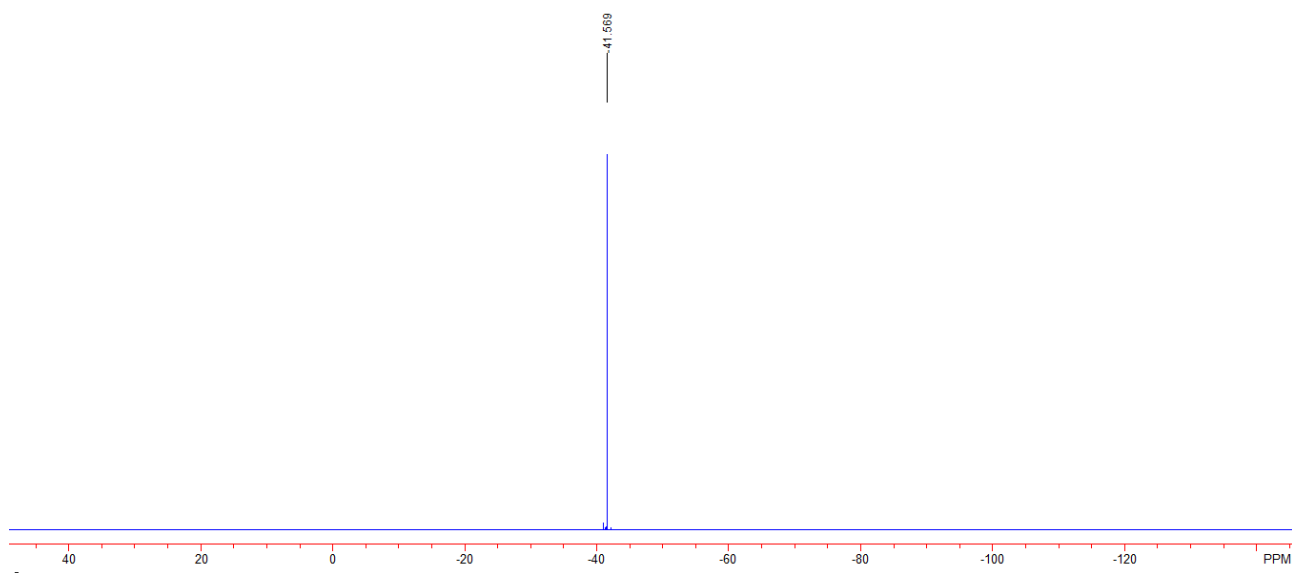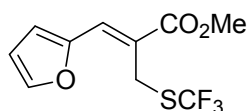

**Compound 3m:** Yield: 40 mg, 75%. A colourless oil. IR (neat)  $\nu$  3004, 2955, 2923, 2850, 1709, 1633, 1437, 1275, 1267, 1213, 1195, 1111, 1084, 1020, 884, 764, 750  $\text{cm}^{-1}$ ;  $^1\text{H}$  NMR (400 MHz,  $\text{CDCl}_3$ , TMS)  $\delta$  3.84 (s, 3H), 4.34 (s, 2H), 6.54 (dd,  $J = 3.6$  Hz, 2.0 Hz, 1H), 6.74 (d,  $J = 3.6$  Hz, 1H), 7.50 (s, 1H), 7.61 (d,  $J = 1.6$  Hz, 1H);  $^{13}\text{C}$  NMR (100 MHz,  $\text{CDCl}_3$ , TMS)  $\delta$  26.8 (q,  $J = 2.3$  Hz), 52.4, 112.4, 118.2, 122.3, 127.7, 131.4 (q,  $J = 305.5$  Hz), 145.7, 150.3, 167.1;  $^{19}\text{F}$  NMR (376 MHz,  $\text{CDCl}_3$ ,  $\text{CFCl}_3$ )  $\delta$  -41.6; HRMS (EI) Calcd. for  $\text{C}_{10}\text{H}_9\text{F}_3\text{O}_3\text{S}$  requires ( $\text{M}^+$ ): 266.0225, Found: 266.0218.

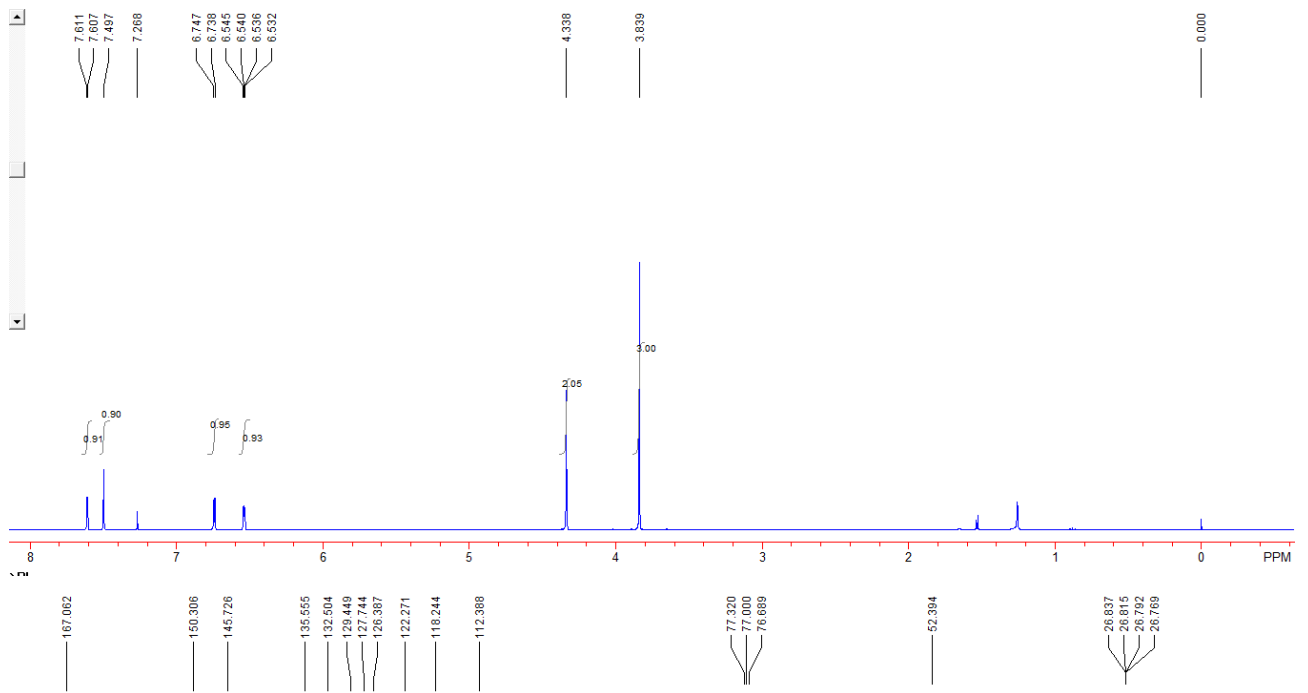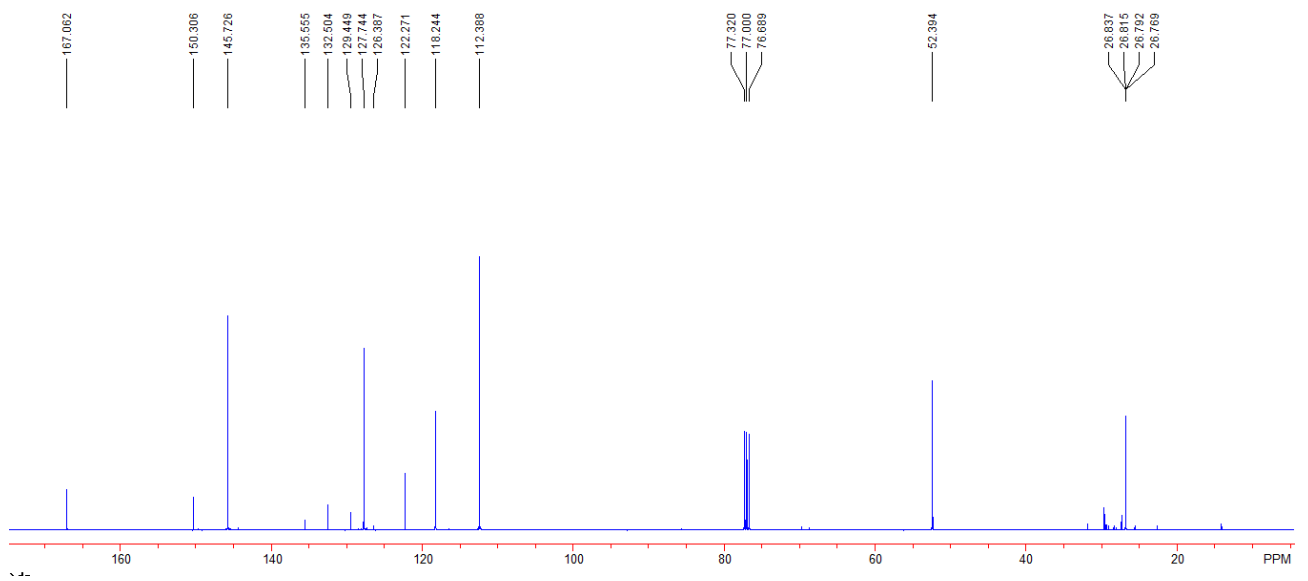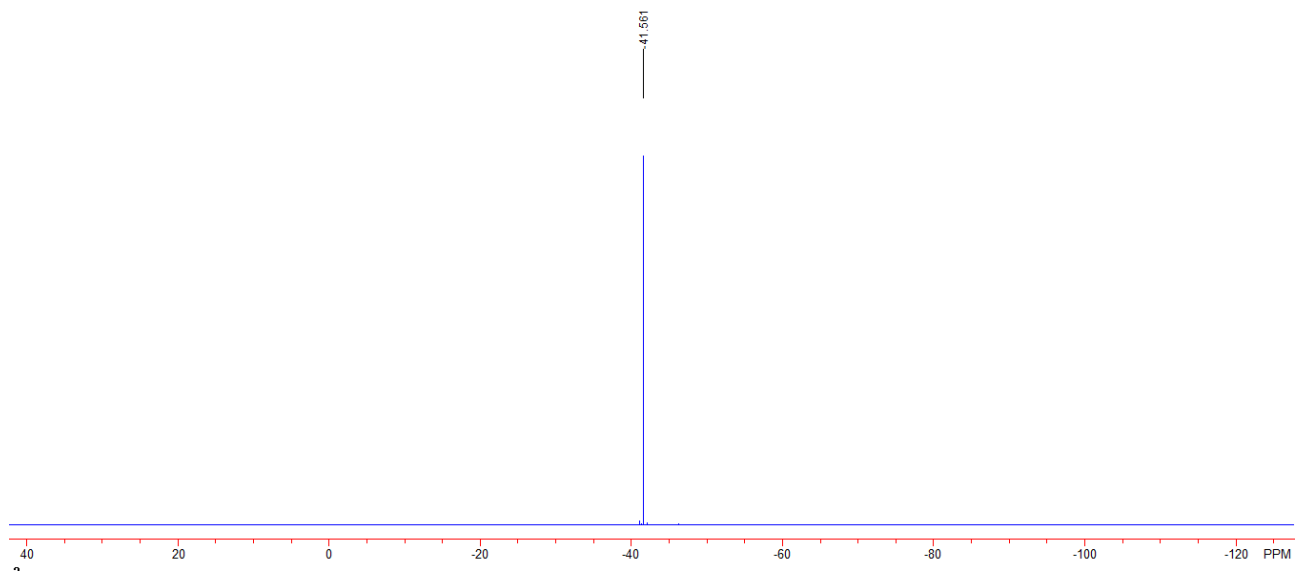

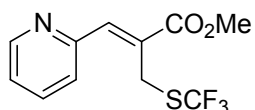

**Compound 3n:** Yield: 48 mg, 87%. A white solid. m. p.: 48-50 °C. IR (neat)  $\nu$  3008, 2984, 2951, 1716, 1583, 1437, 1276, 1261, 1225, 1115, 1079, 789, 764, 750  $\text{cm}^{-1}$ ;  $^1\text{H}$  NMR (400 MHz,  $\text{CDCl}_3$ , TMS)  $\delta$  3.88 (s, 3H), 4.64 (s, 2H), 7.25 (dd,  $J = 7.2$  Hz, 4.8 Hz, 1H), 7.40 (d,  $J = 7.6$  Hz, 1H), 7.66 (s, 1H), 7.74 (td,  $J = 8.0$  Hz, 2.0 Hz, 1H), 8.69 (d,  $J = 4.4$  Hz, 1H);  $^{13}\text{C}$  NMR (100 MHz,  $\text{CDCl}_3$ , TMS)  $\delta$  26.1 (q,  $J = 2.1$  Hz), 52.5, 123.5, 127.5, 131.3 (q,  $J = 304.5$  Hz), 131.9, 136.6, 138.0, 149.5, 153.3, 167.1;  $^{19}\text{F}$  NMR (376 MHz,  $\text{CDCl}_3$ ,  $\text{CFCl}_3$ )  $\delta$  -41.7; HRMS (EI) Calcd. for  $\text{C}_{11}\text{H}_{10}\text{F}_3\text{NO}_2\text{S}$  requires ( $\text{M}^+$ ): 277.0384, Found: 277.0380.

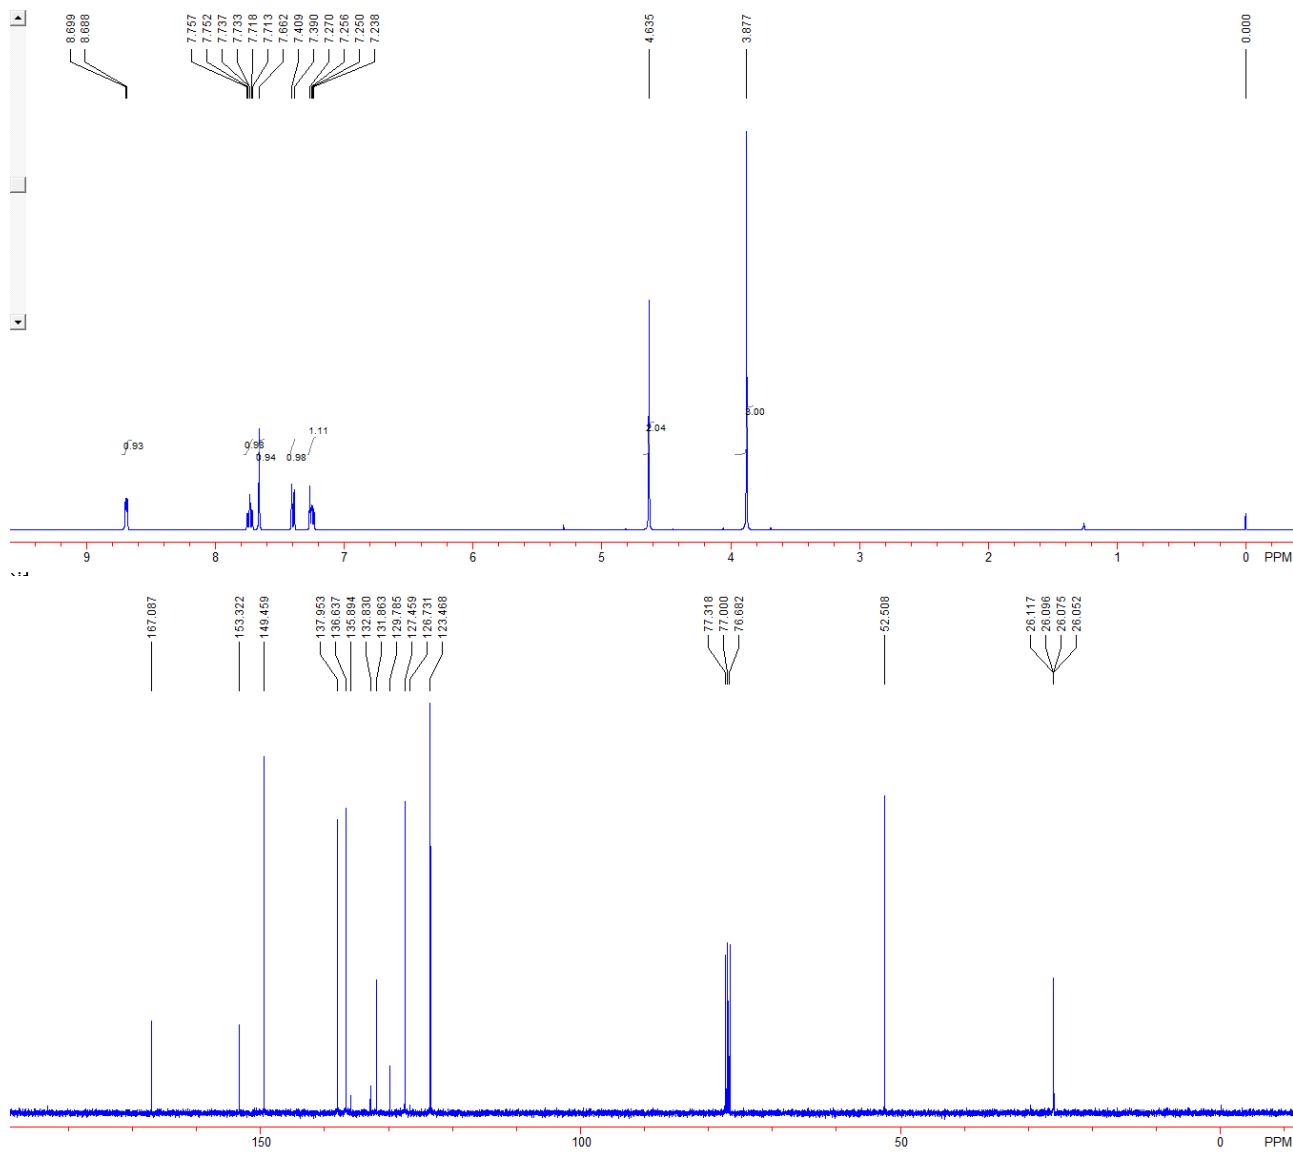

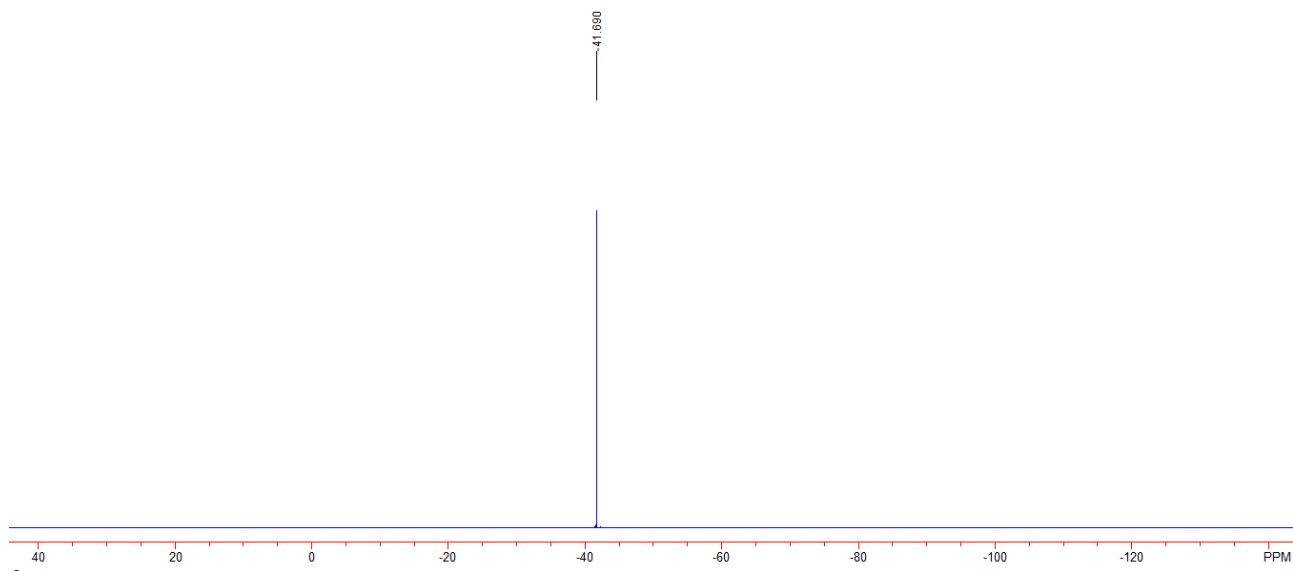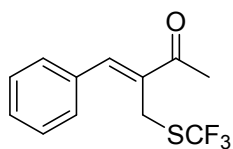

**Compound 3o:** Yield: 50 mg, 96%. A white solid. m. p.: 42-43 °C. IR (neat)  $\nu$  3004, 2923, 2846, 1670, 1624, 1447, 1378, 1275, 1260, 1216, 1147, 1109, 965, 765, 750, 696  $\text{cm}^{-1}$ ;  $^1\text{H}$  NMR (400 MHz,  $\text{CDCl}_3$ , TMS)  $\delta$  2.50 (s, 3H), 4.02 (s, 2H), 7.41-7.48 (m, 5H), 7.71 (s, 1H);  $^{13}\text{C}$  NMR (100 MHz,  $\text{CDCl}_3$ , TMS)  $\delta$  25.4 (q,  $J = 2.3$  Hz), 25.6, 128.9, 129.2, 129.7, 130.7 (q,  $J = 305.7$  Hz), 134.1, 135.4, 143.7, 197.8;  $^{19}\text{F}$  NMR (376 MHz,  $\text{CDCl}_3$ ,  $\text{CFCl}_3$ )  $\delta$  -42.1; HRMS (EI) Calcd. for  $\text{C}_{12}\text{H}_{11}\text{F}_3\text{OS}$  requires ( $\text{M}^+$ ): 260.0483, Found: 260.0480.

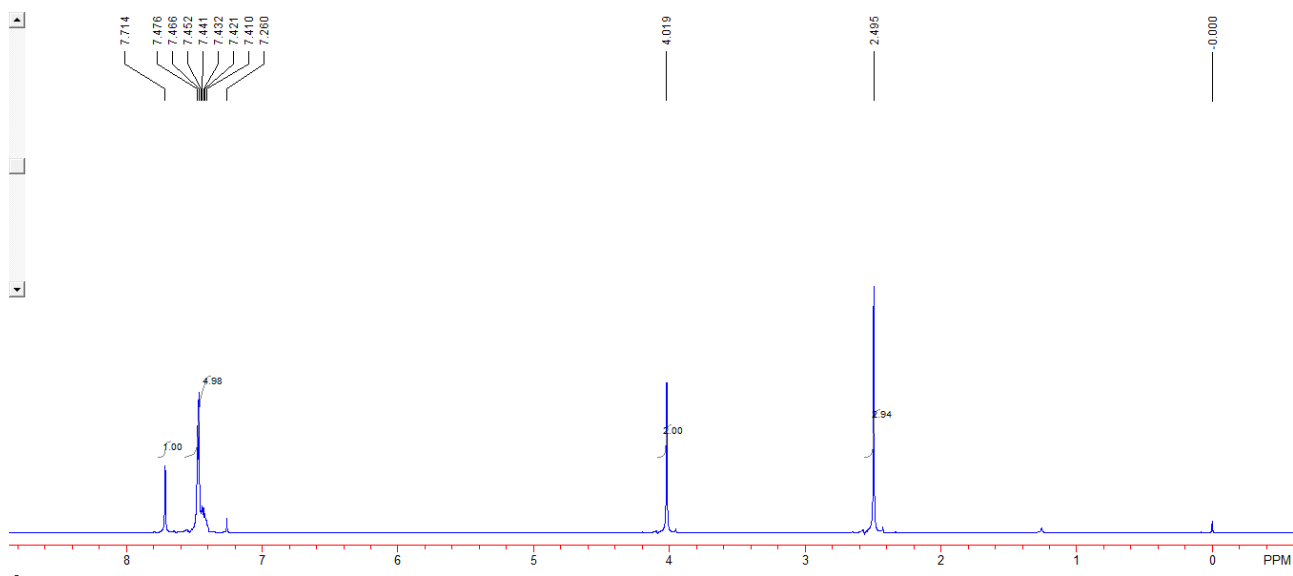

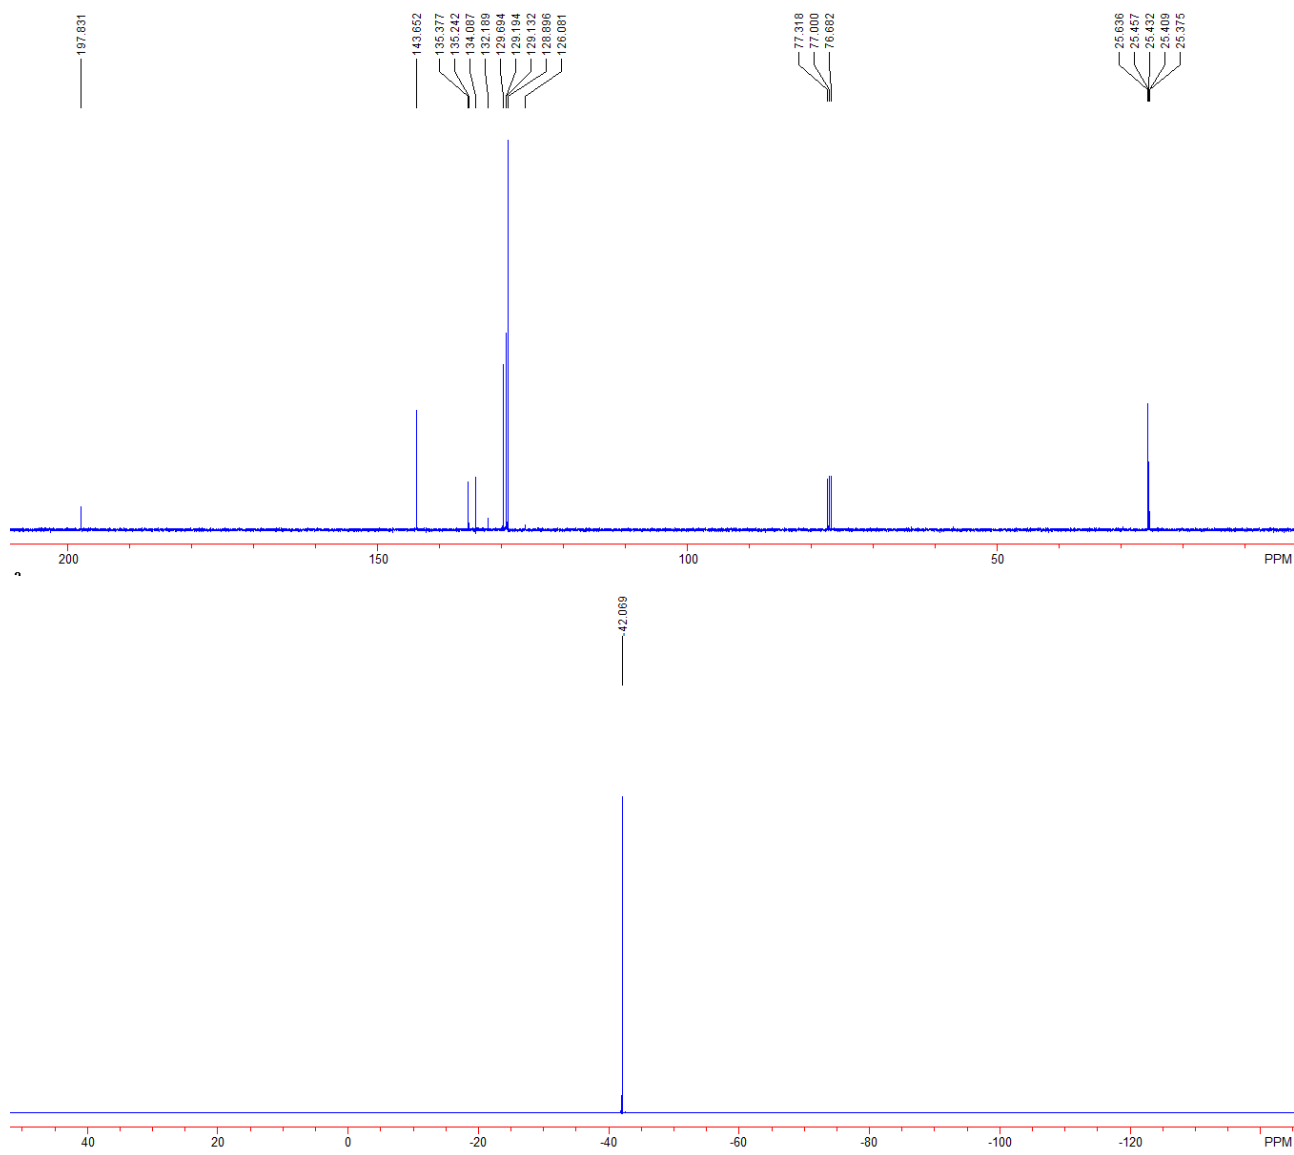

**Procedure for DABCO-catalyzed secondary allylic trifluoromethylthiolation reaction of MBH adducts:**

To a solution of MBH adducts **I-3-2** (0.2 mmol) and *O*-octadecyl-*S*-trifluorothiolcarbonate **I-3-1a** (0.4 mmol) in CHCl<sub>3</sub> (2 mL) was added DABCO (0.04 mmol) and the reaction mixture was stirred for 10 h at 0 °C under air. The reaction mixture was concentrated and the crude product was purified by flash chromatograph (silica gel, petroleum ether : dichloromethane = 10:1-5:1) to give the corresponding products **4**.

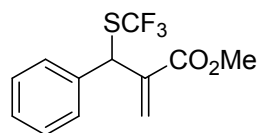

**Compound 4a:** Yield: 39 mg, 71%. A colourless oil. IR (neat)  $\nu$  2961, 2928, 2856, 1725, 1631, 1454, 1440, 1316, 1259, 1111, 1017, 953, 802, 756, 700  $\text{cm}^{-1}$ ;  $^1\text{H}$  NMR (400 MHz,  $\text{CDCl}_3$ , TMS)  $\delta$  3.73 (s, 3H), 5.58 (s, 1H), 6.11 (s, 1H), 6.55 (s, 1H), 7.24-7.38 (m, 5H);  $^{13}\text{C}$  NMR (100 MHz,  $\text{CDCl}_3$ , TMS)  $\delta$  48.7 (q,  $J = 2.6$  Hz), 52.3, 128.0, 128.2, 128.5, 128.8, 129.8 (q,  $J = 306.7$  Hz), 137.3, 139.0, 165.4;  $^{19}\text{F}$  NMR (376 MHz,  $\text{CDCl}_3$ ,  $\text{CFCl}_3$ )  $\delta$  -41.4; HRMS (EI) Calcd. for  $\text{C}_{12}\text{H}_{11}\text{F}_3\text{O}_2\text{S}$  requires ( $\text{M}^+$ ): 276.0432, Found: 276.0435.

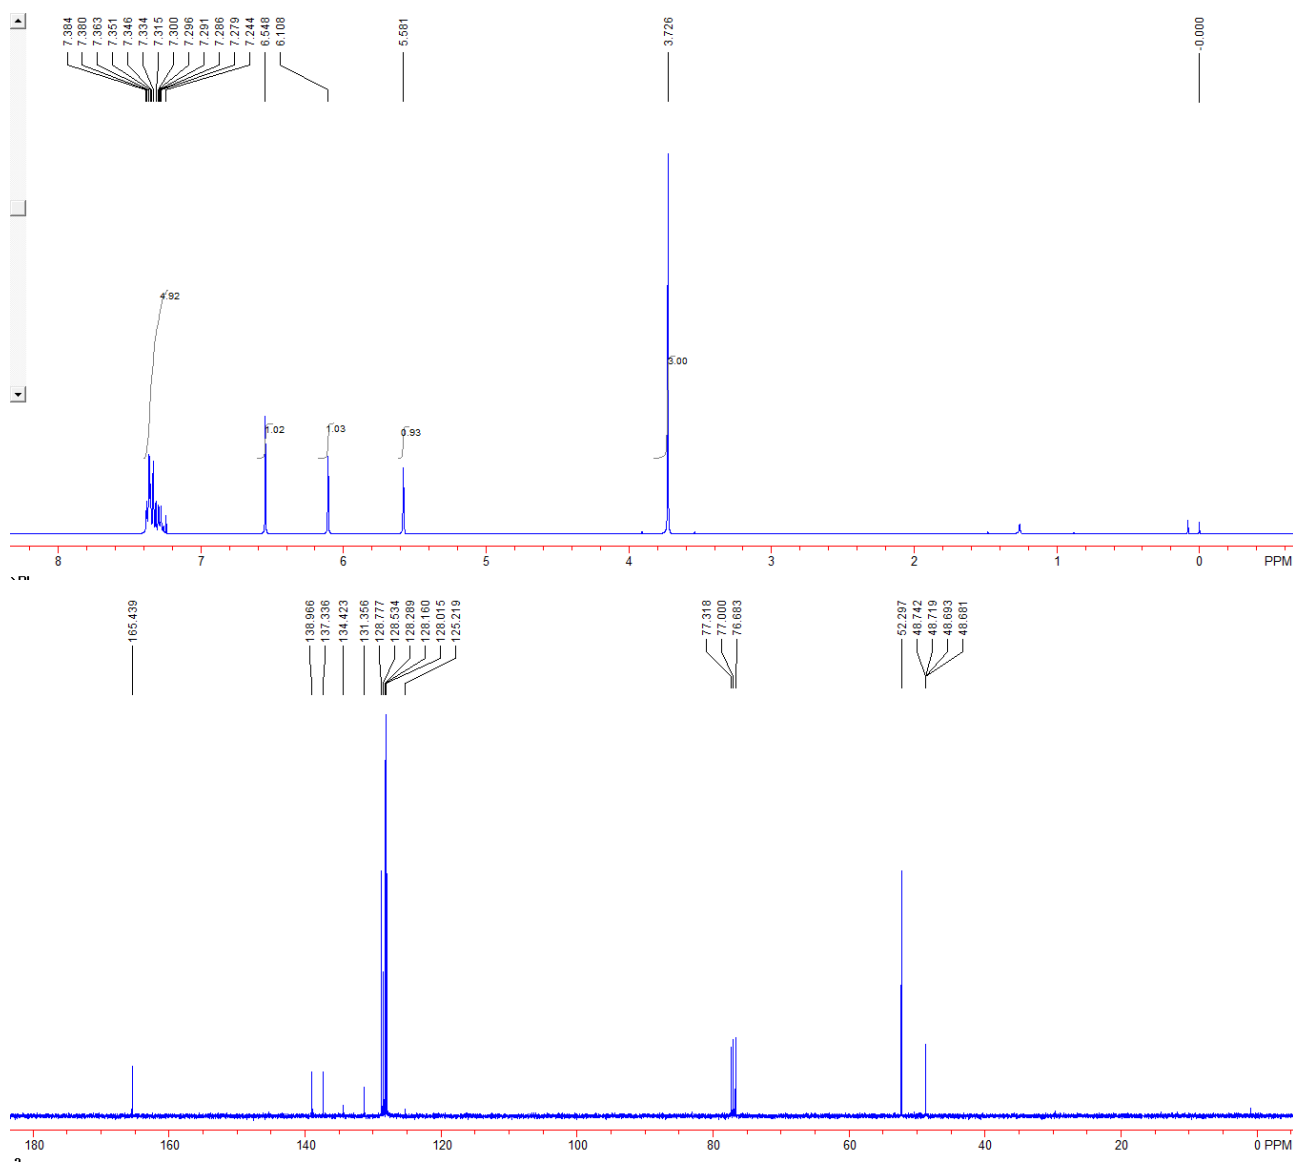



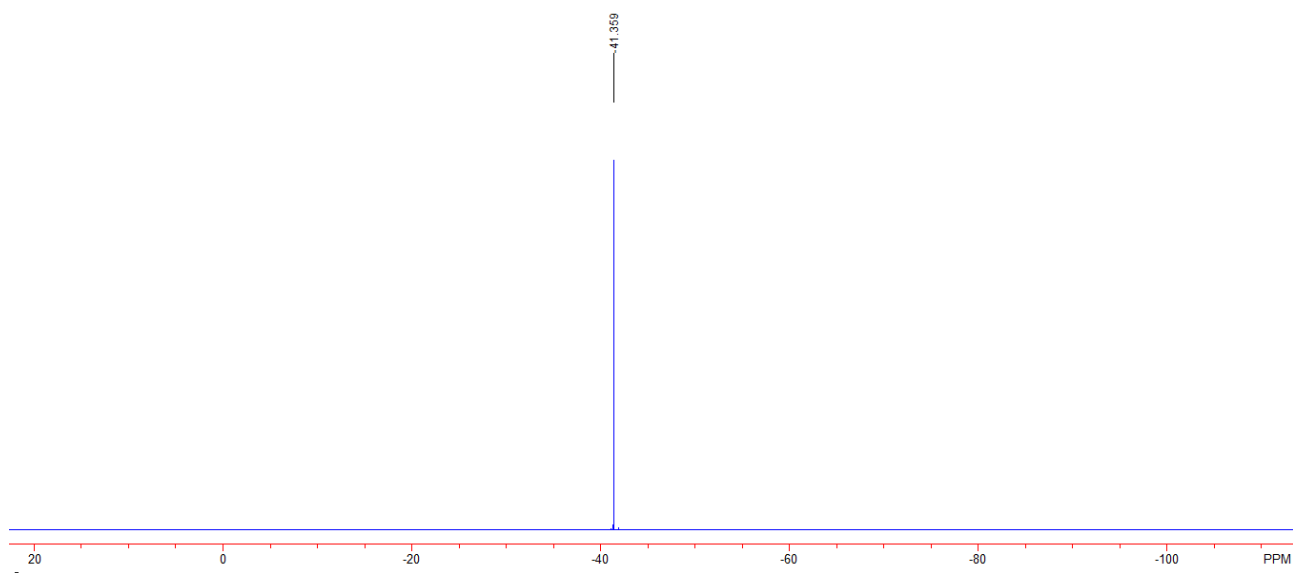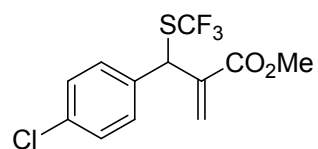

**Compound 4b:** Yield: 52 mg, 84%. A colourless oil. IR (neat)  $\nu$  2960, 2919, 2850, 1723, 1491, 1439, 1250, 1110, 1015, 954, 817, 755  $\text{cm}^{-1}$ ;  $^1\text{H}$  NMR (400 MHz,  $\text{CDCl}_3$ , TMS)  $\delta$  3.74 (s, 3H), 5.53 (s, 1H), 6.08 (s, 1H), 6.55 (s, 1H), 7.31 (brs, 4H);  $^{13}\text{C}$  NMR (100 MHz,  $\text{CDCl}_3$ , TMS)  $\delta$  48.1 (q,  $J = 2.4$  Hz), 52.4, 128.7, 129.0, 129.4, 129.7 (q,  $J = 306.6$  Hz), 134.1, 136.0, 138.7, 165.3;  $^{19}\text{F}$  NMR (376 MHz,  $\text{CDCl}_3$ ,  $\text{CFCl}_3$ )  $\delta$  -41.3; HRMS (EI) Calcd. for  $\text{C}_{12}\text{H}_{10}\text{ClF}_3\text{O}_2\text{S}$  requires ( $\text{M}^+$ ): 310.0042, Found: 310.0037.

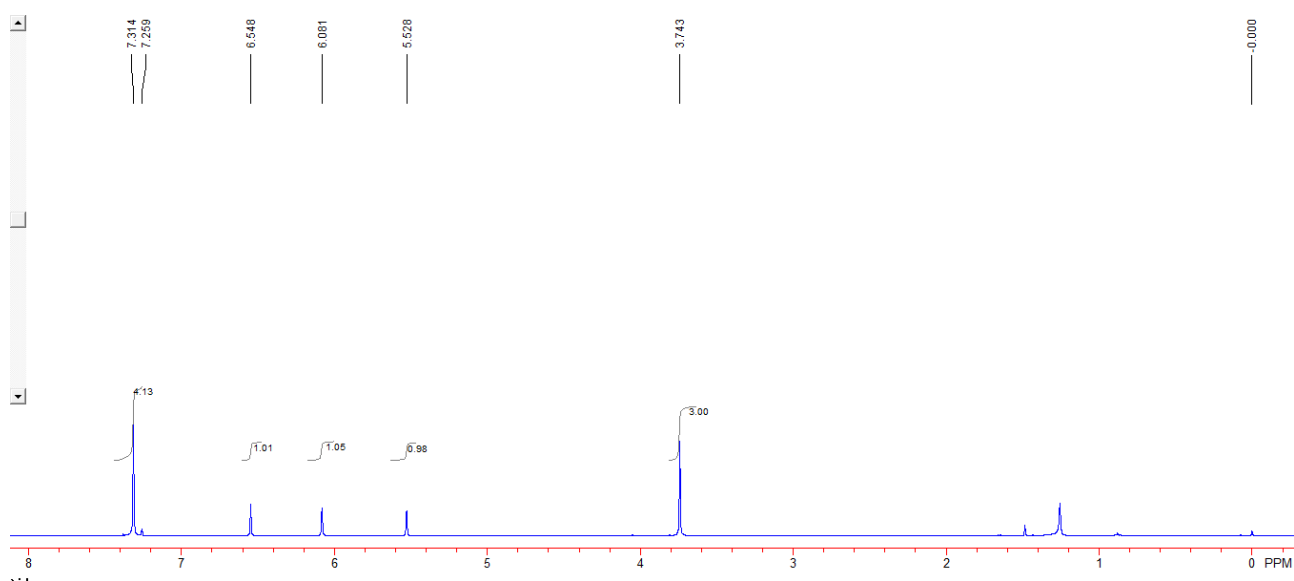

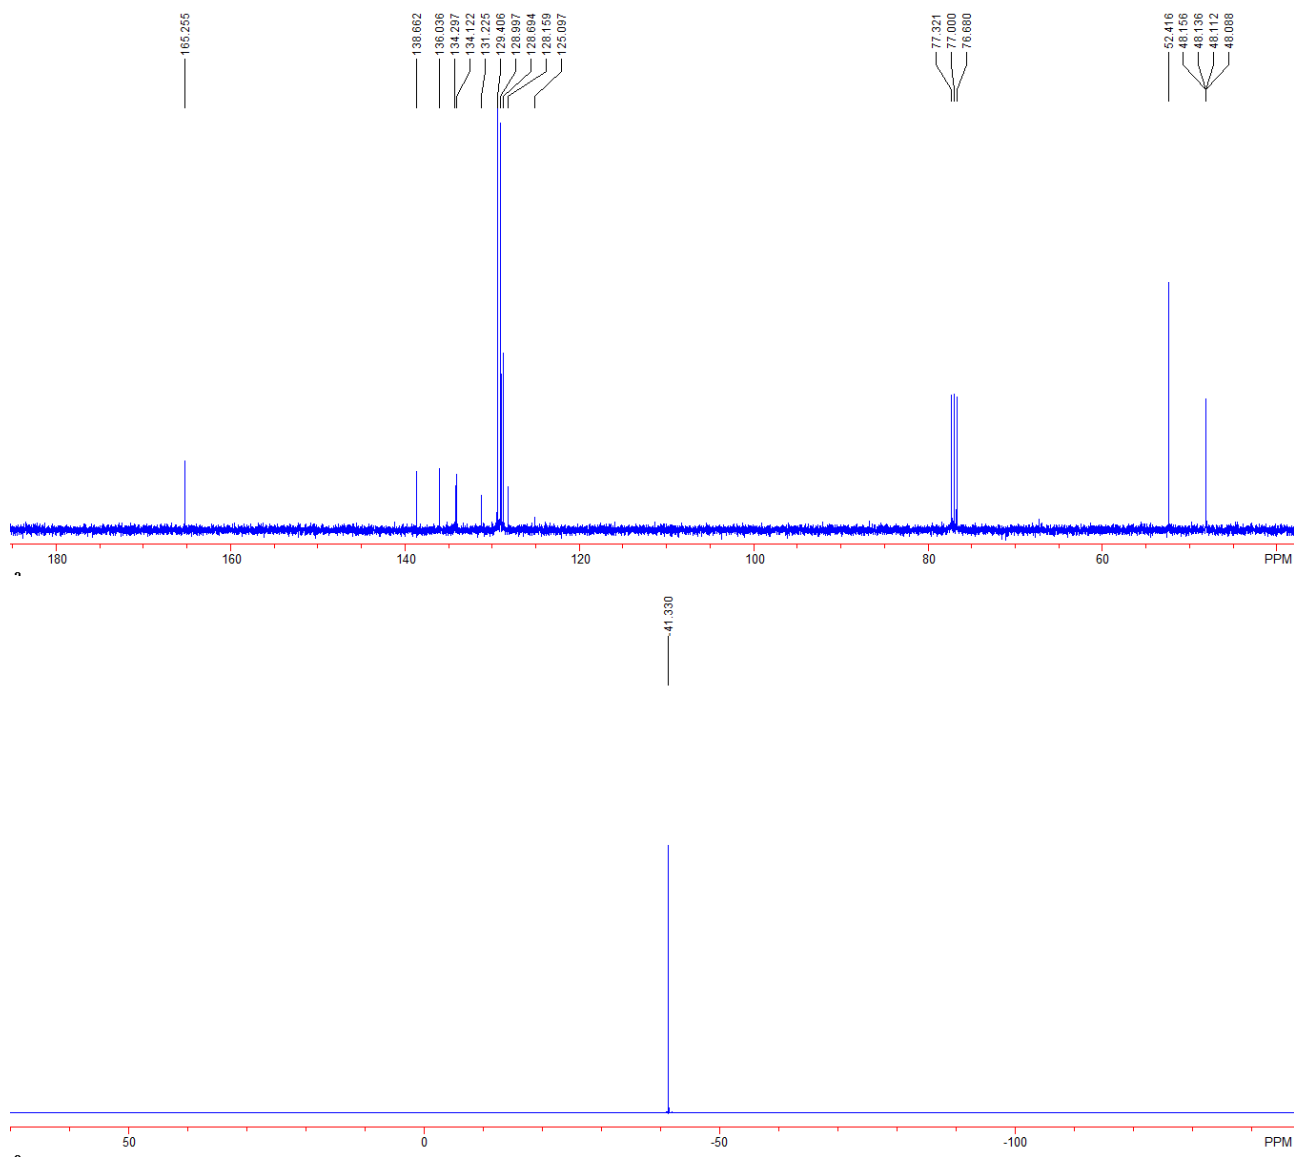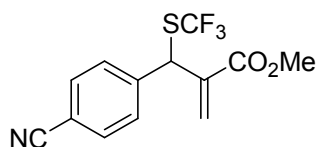

**Compound 4c:** Yield: 28 mg, 46%. A colourless oil. IR (neat)  $\nu$  3004, 2955, 2927, 2850, 2231, 1720, 1439, 1334, 1316, 1276, 1258, 1104, 961, 828, 751  $\text{cm}^{-1}$ ; <sup>1</sup>H NMR (400 MHz, CDCl<sub>3</sub>, TMS)  $\delta$  3.76 (s, H), 5.55 (s, 1H), 6.08 (s, 1H), 6.58 (s, 1H), 7.52 (d,  $J = 8.0$  Hz, 2H), 7.65 (d,  $J = 8.0$  Hz, 2H); <sup>13</sup>C NMR (100 MHz, CDCl<sub>3</sub>, TMS)  $\delta$  48.3 (q,  $J = 2.2$  Hz), 52.6, 112.1, 118.2, 128.8, 129.2, 129.6 (q,  $J = 306.1$  Hz), 132.6, 138.1, 143.0, 165.0; <sup>19</sup>F NMR (376 MHz, CDCl<sub>3</sub>, CFCl<sub>3</sub>)  $\delta$  -41.3; HRMS (EI) Calcd. for C<sub>13</sub>H<sub>10</sub>F<sub>3</sub>NO<sub>2</sub>S requires (M<sup>+</sup>): 301.0384, Found: 301.0381.

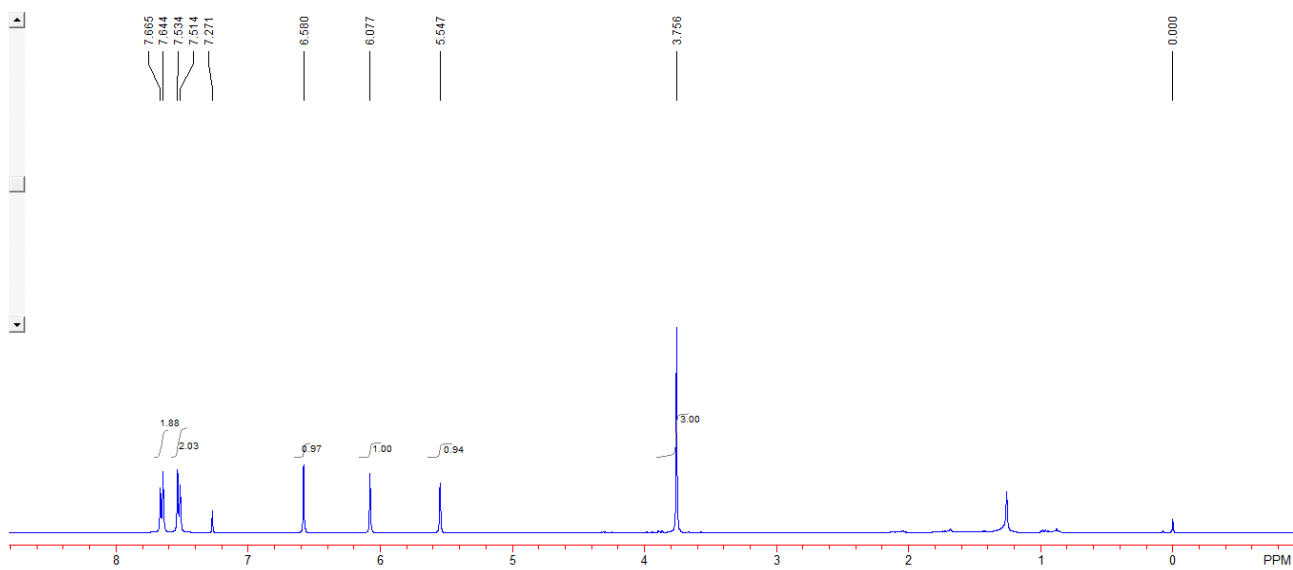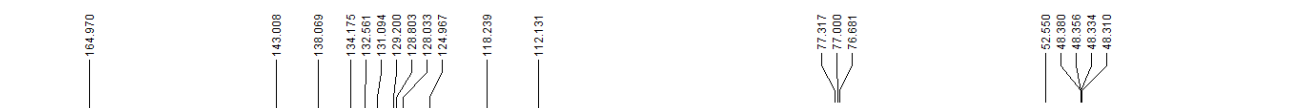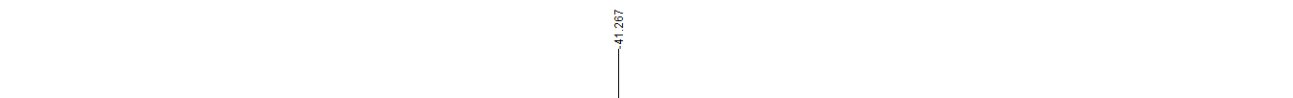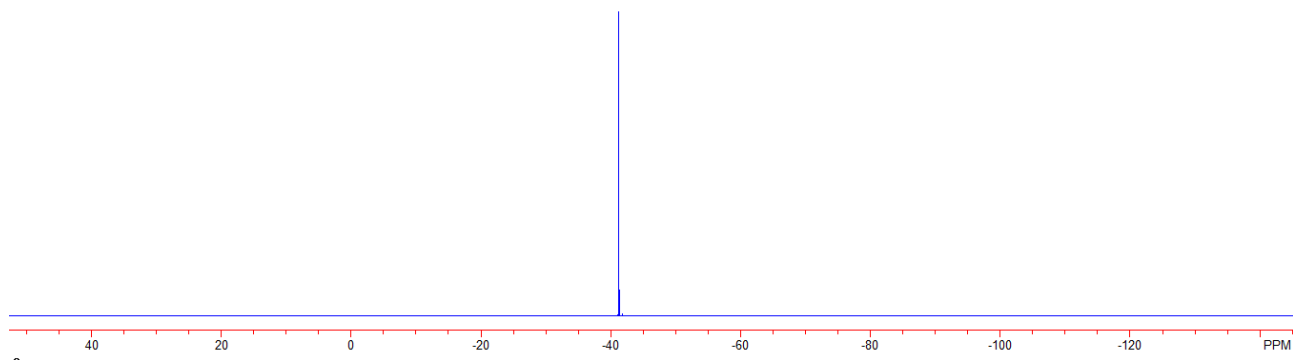

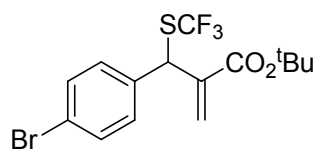

**Compound 4d:** Yield: 60 mg, 76%. A colourless oil. IR (neat)  $\nu$  3004, 2980, 2923, 1722, 1706, 1275, 1260, 1149, 1112, 1012, 764, 750  $\text{cm}^{-1}$ ;  $^1\text{H}$  NMR (400 MHz,  $\text{CDCl}_3$ , TMS)  $\delta$  1.41 (s, 9H), 5.43 (s, 1H), 5.91 (s, 1H), 6.44 (s, 1H), 7.26 (d,  $J = 8.4$  Hz, 2H), 7.47 (d,  $J = 8.4$  Hz, 2H);  $^{13}\text{C}$  NMR (100 MHz,  $\text{CDCl}_3$ , TMS)  $\delta$  27.8, 48.4 (q,  $J = 2.5$  Hz), 82.2, 122.0, 127.8, 129.7, 129.8 (q,  $J = 307.4$  Hz), 131.8, 137.1, 140.1, 163.8;  $^{19}\text{F}$  NMR (376 MHz,  $\text{CDCl}_3$ ,  $\text{CFCl}_3$ )  $\delta$  -41.3; HRMS (EI) Calcd. for  $\text{C}_{15}\text{H}_{16}\text{BrF}_3\text{O}_2\text{S}$  requires ( $\text{M}^+$ ): 396.0006, Found: 396.0009.

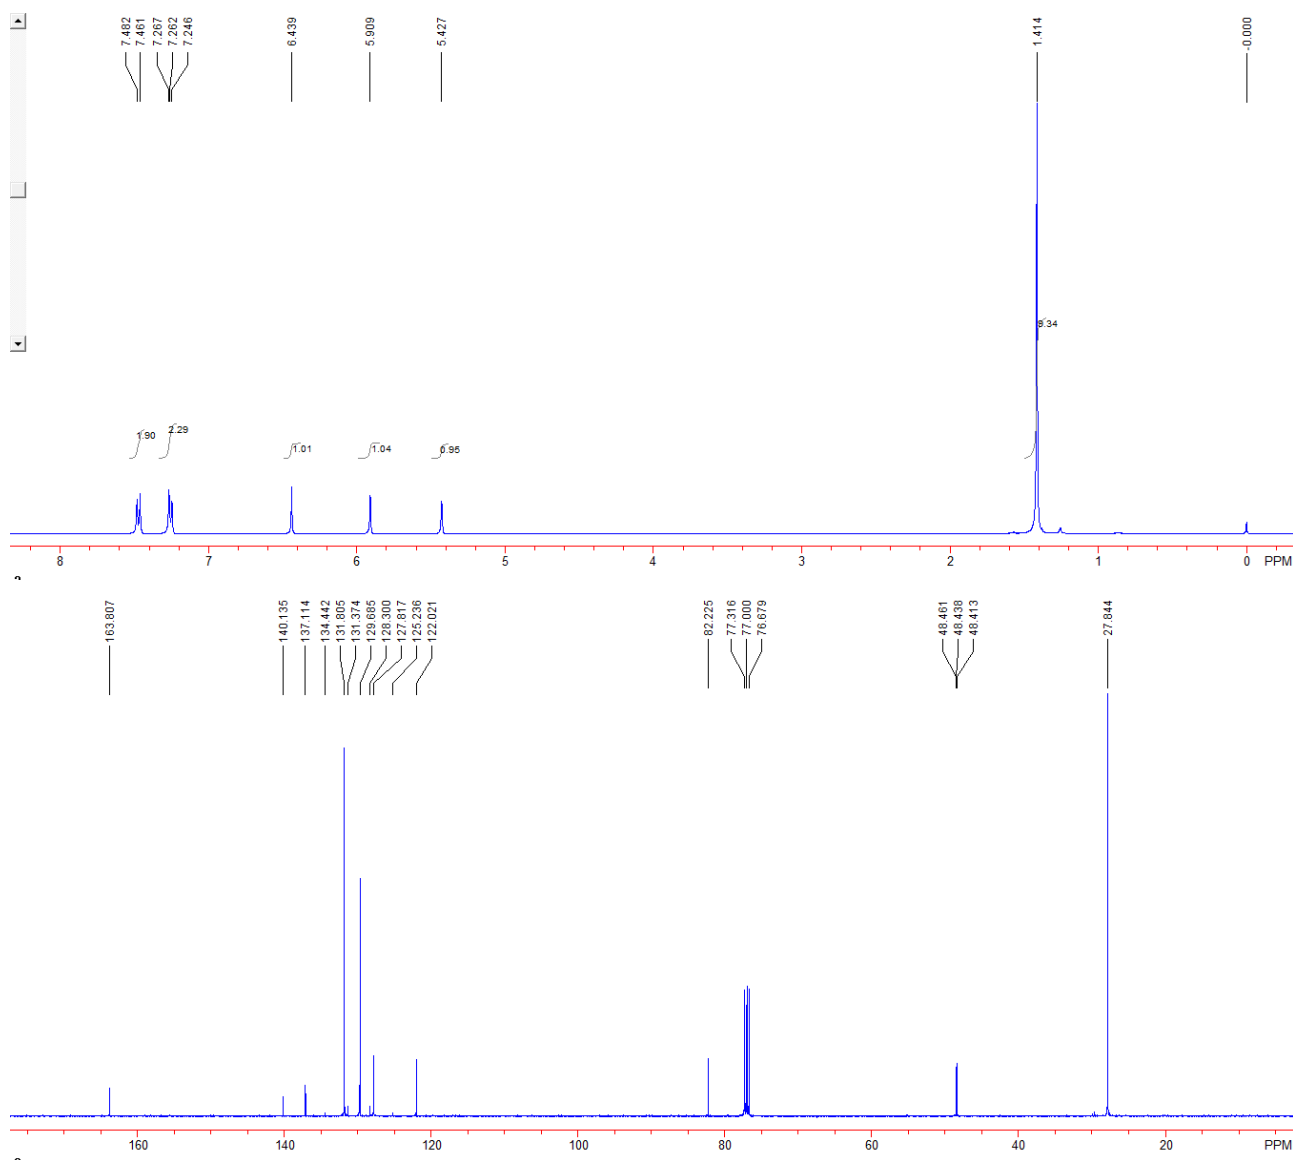

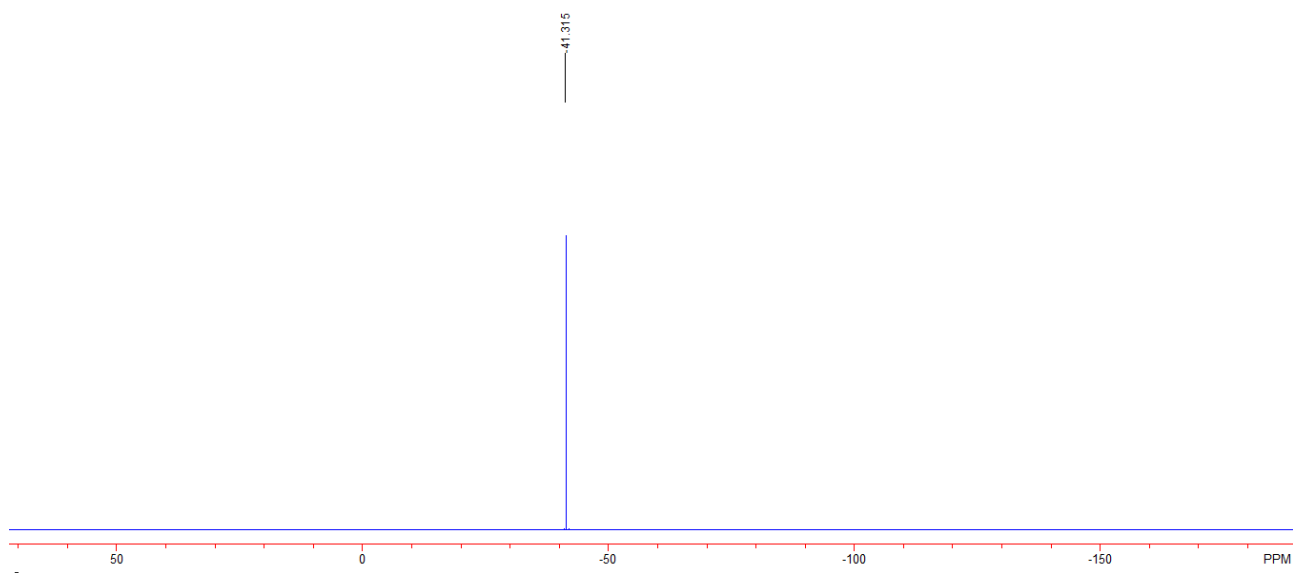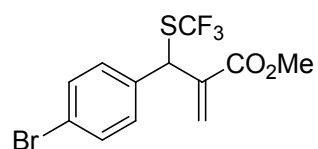

**Compound 4e:** Yield: 36 mg, 50%. A colourless oil. IR (neat)  $\nu$  2960, 2926, 2854, 1723, 1629, 1488, 1439, 1404, 1330, 1249, 1149, 1108, 1074, 1012, 849, 815  $\text{cm}^{-1}$ ;  $^1\text{H}$  NMR (400 MHz,  $\text{CDCl}_3$ , TMS)  $\delta$  3.75 (s, 3H), 5.51 (s, 1H), 6.08 (s, 1H), 6.55 (s, 1H), 7.26 (d,  $J = 8.4$  Hz, 2H), 7.47 (d,  $J = 8.4$  Hz, 2H);  $^{13}\text{C}$  NMR (100 MHz,  $\text{CDCl}_3$ , TMS)  $\delta$  48.2 (q,  $J = 2.7$  Hz), 52.4, 122.3, 128.8, 129.66 (q,  $J = 305.9$  Hz), 129.7, 132.0, 136.6, 138.6, 165.2;  $^{19}\text{F}$  NMR (376 MHz,  $\text{CDCl}_3$ ,  $\text{CFCl}_3$ )  $\delta$  -41.3; HRMS (EI) Calcd. for  $\text{C}_{12}\text{H}_{10}\text{BrF}_3\text{O}_2\text{S}$  requires ( $\text{M}^+$ ): 353.9537, Found: 353.9535.

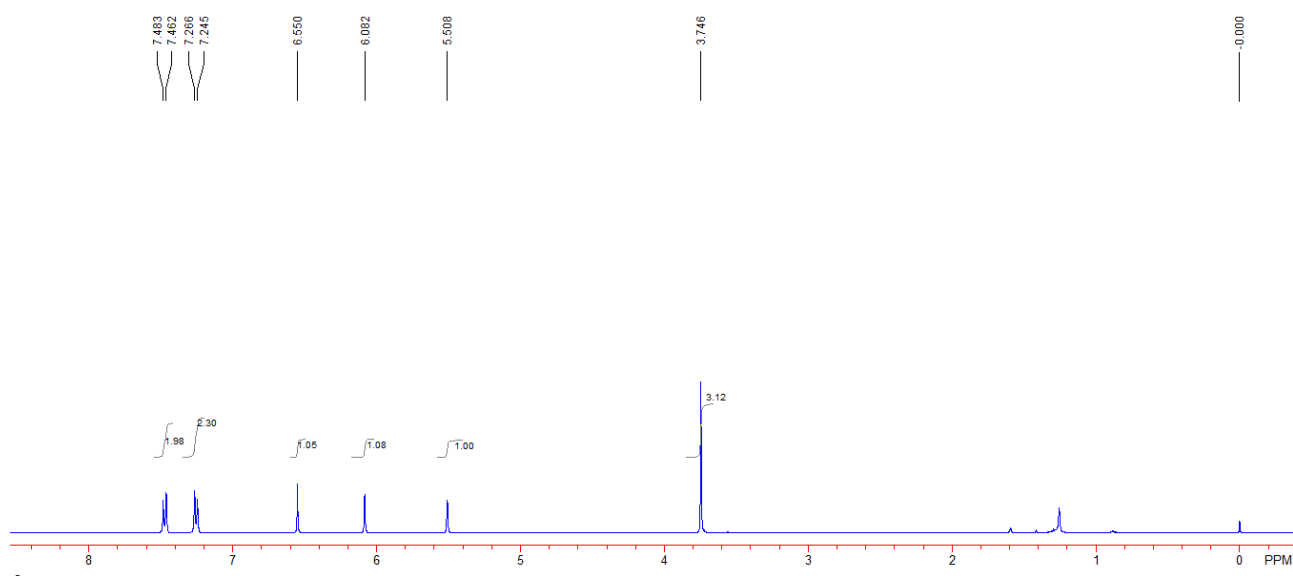

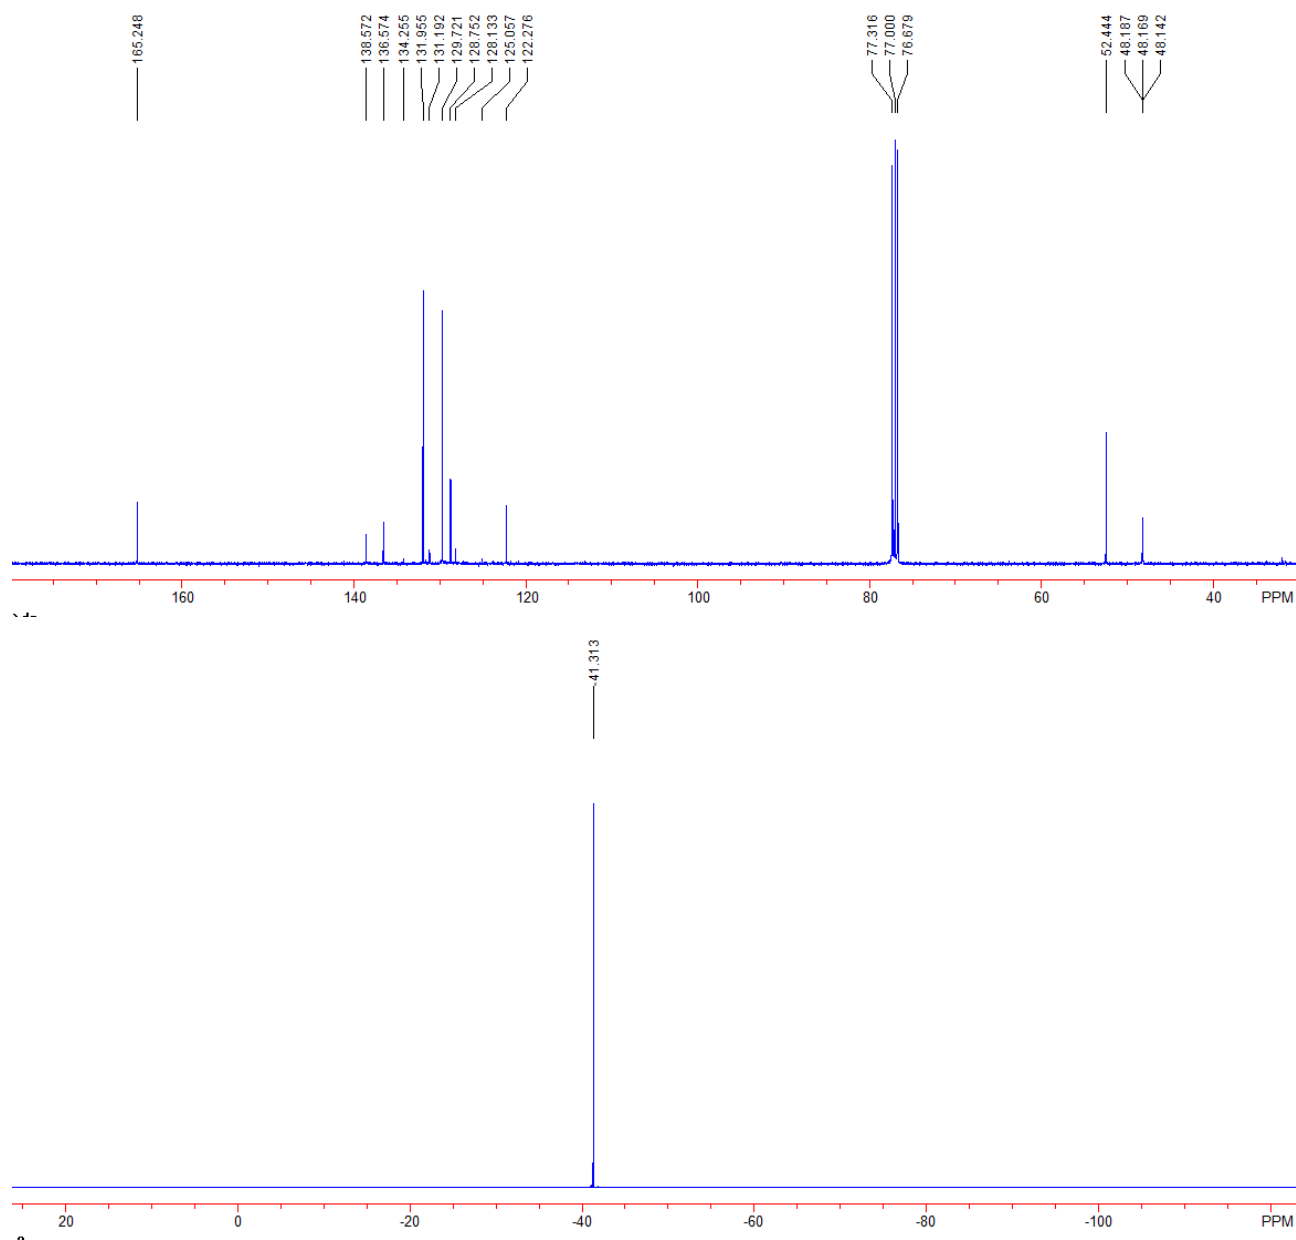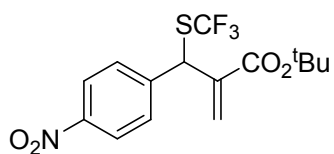

**Compound 4f:** Yield: 60 mg, 83%. A colourless oil. IR (neat)  $\nu$  2980, 2931, 2854, 1725, 1708, 1607, 1597, 1526, 1370, 1348, 1253, 1147, 1109, 963, 851, 833, 756  $\text{cm}^{-1}$ ; <sup>1</sup>H NMR (400 MHz, CDCl<sub>3</sub>, TMS)  $\delta$  1.42 (s, 9H), 5.53 (s, 1H), 5.94 (s, 1H), 6.49 (s, 1H), 7.60 (d,  $J = 8.8$  Hz, 2H), 8.22 (d,  $J = 8.8$  Hz, 2H); <sup>13</sup>C NMR (100 MHz, CDCl<sub>3</sub>, TMS)  $\delta$  27.8, 48.4 (q,  $J = 2.3$  Hz), 82.6, 123.9, 128.4, 129.0, 129.8 (q,  $J = 306.6$  Hz), 139.6, 145.6, 147.5, 163.5; <sup>19</sup>F NMR (376 MHz, CDCl<sub>3</sub>,

$\text{CFCl}_3$   $\delta$  -41.3; HRMS (EI) Calcd. for  $\text{C}_{15}\text{H}_{16}\text{F}_3\text{NO}_4\text{S}$  requires ( $\text{M}^+$ ): 363.0752, Found: 363.0755.

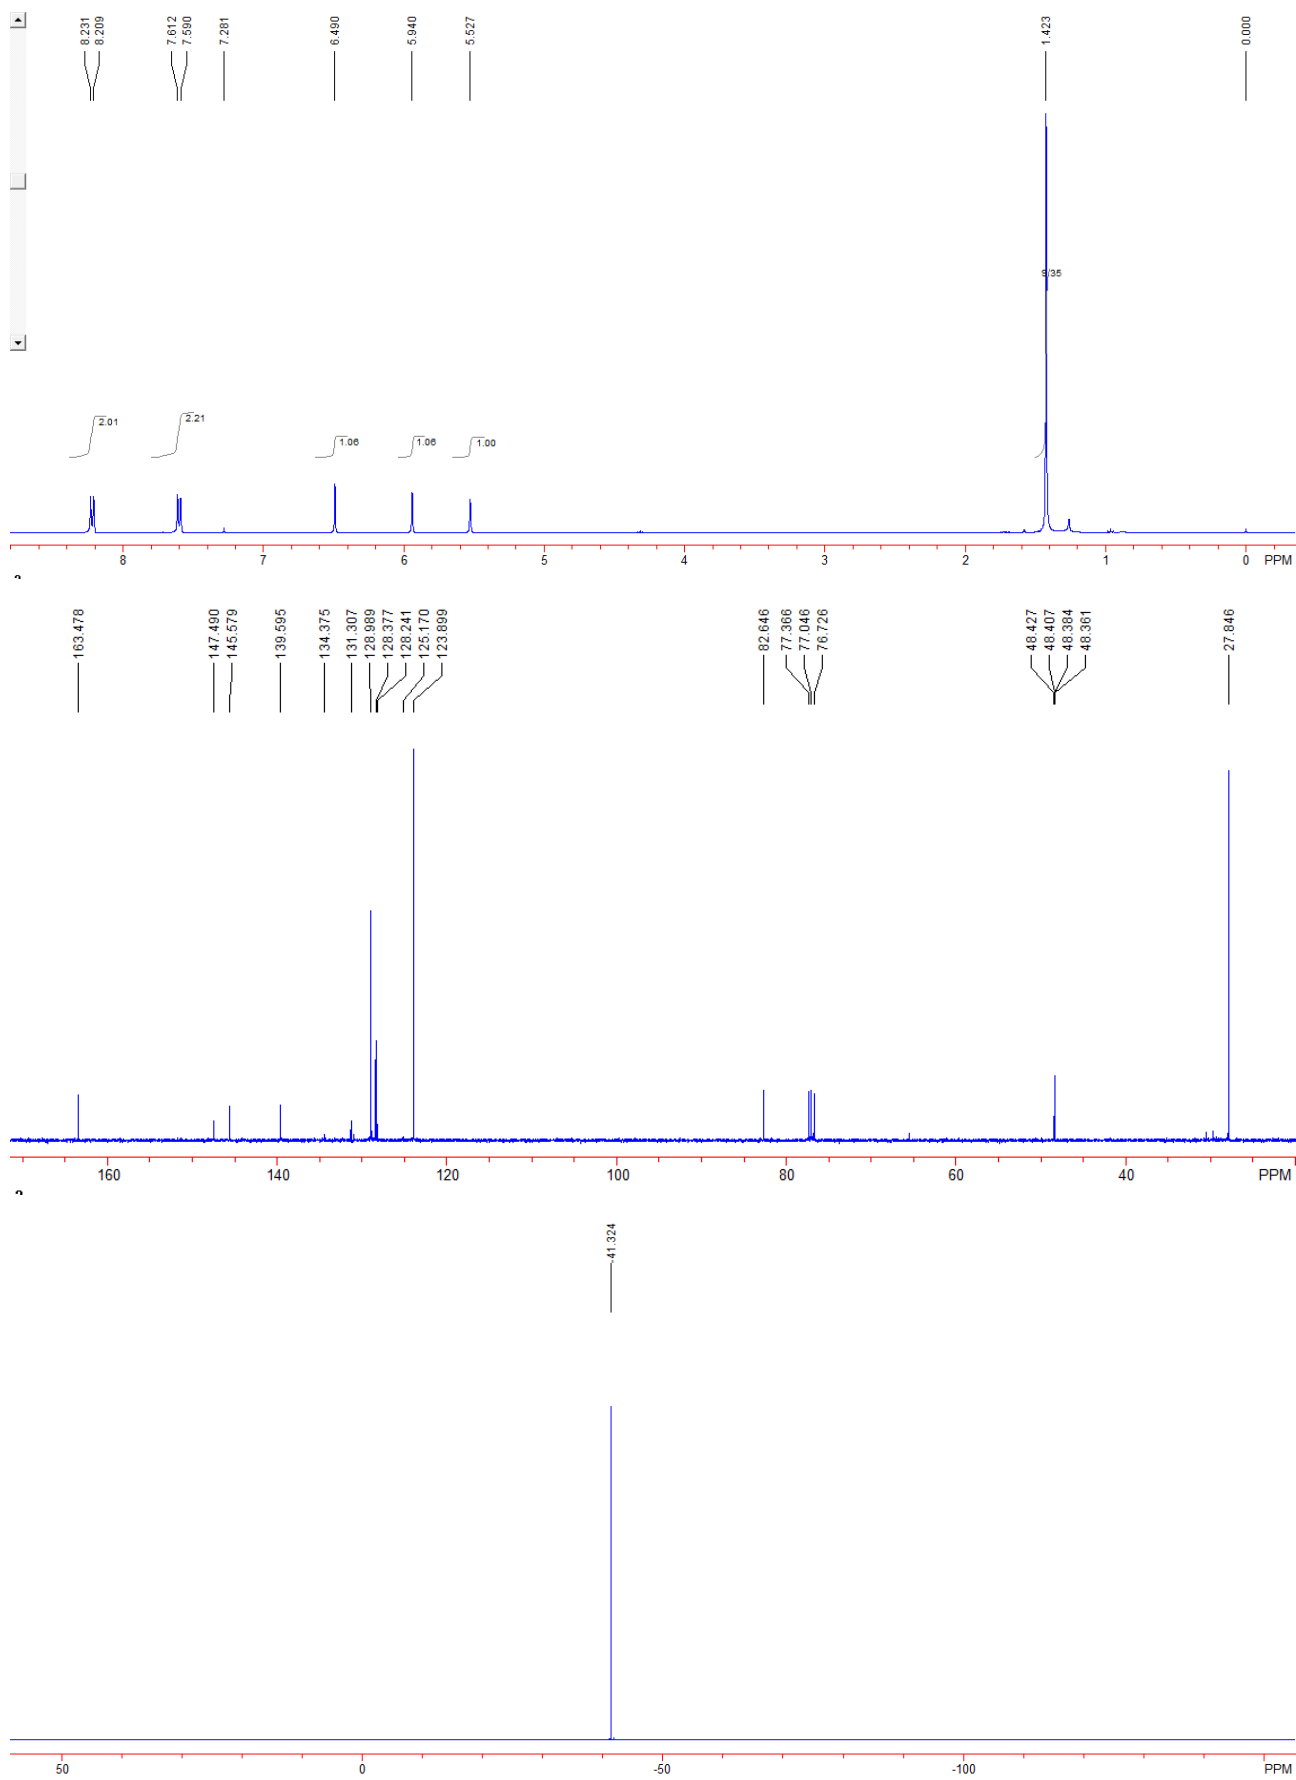

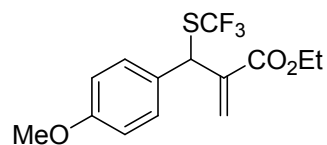

**Compound 4g:** Yield: 39 mg, 63%. A colourless oil. IR (neat)  $\nu$  2964, 2928, 2850, 1717, 1610, 1511, 1463, 1304, 1255, 1175, 1108, 1034  $\text{cm}^{-1}$ ;  $^1\text{H}$  NMR (400 MHz,  $\text{CDCl}_3$ , TMS)  $\delta$  1.25 (t,  $J = 7.2$  Hz, 3H), 3.79 (s, 3H), 4.14-4.22 (m, 2H), 5.55 (s, 1H), 6.09 (s, 1H), 6.53 (s, 1H), 6.86 (d,  $J = 8.8$  Hz, 2H), 7.28 (d,  $J = 8.8$  Hz, 2H);  $^{13}\text{C}$  NMR (100 MHz,  $\text{CDCl}_3$ , TMS)  $\delta$  14.0, 48.3 (q,  $J = 2.2$  Hz), 55.2, 61.3, 114.1, 127.9, 129.3, 129.8 (q,  $J = 307.4$  Hz), 139.4, 159.3, 165.0;  $^{19}\text{F}$  NMR (376 MHz,  $\text{CDCl}_3$ ,  $\text{CFCl}_3$ )  $\delta$  -41.3; HRMS (EI) Calcd. for  $\text{C}_{14}\text{H}_{15}\text{F}_3\text{O}_3\text{S}$  requires ( $\text{M}^+$ ): 320.0694, Found: 320.0688.

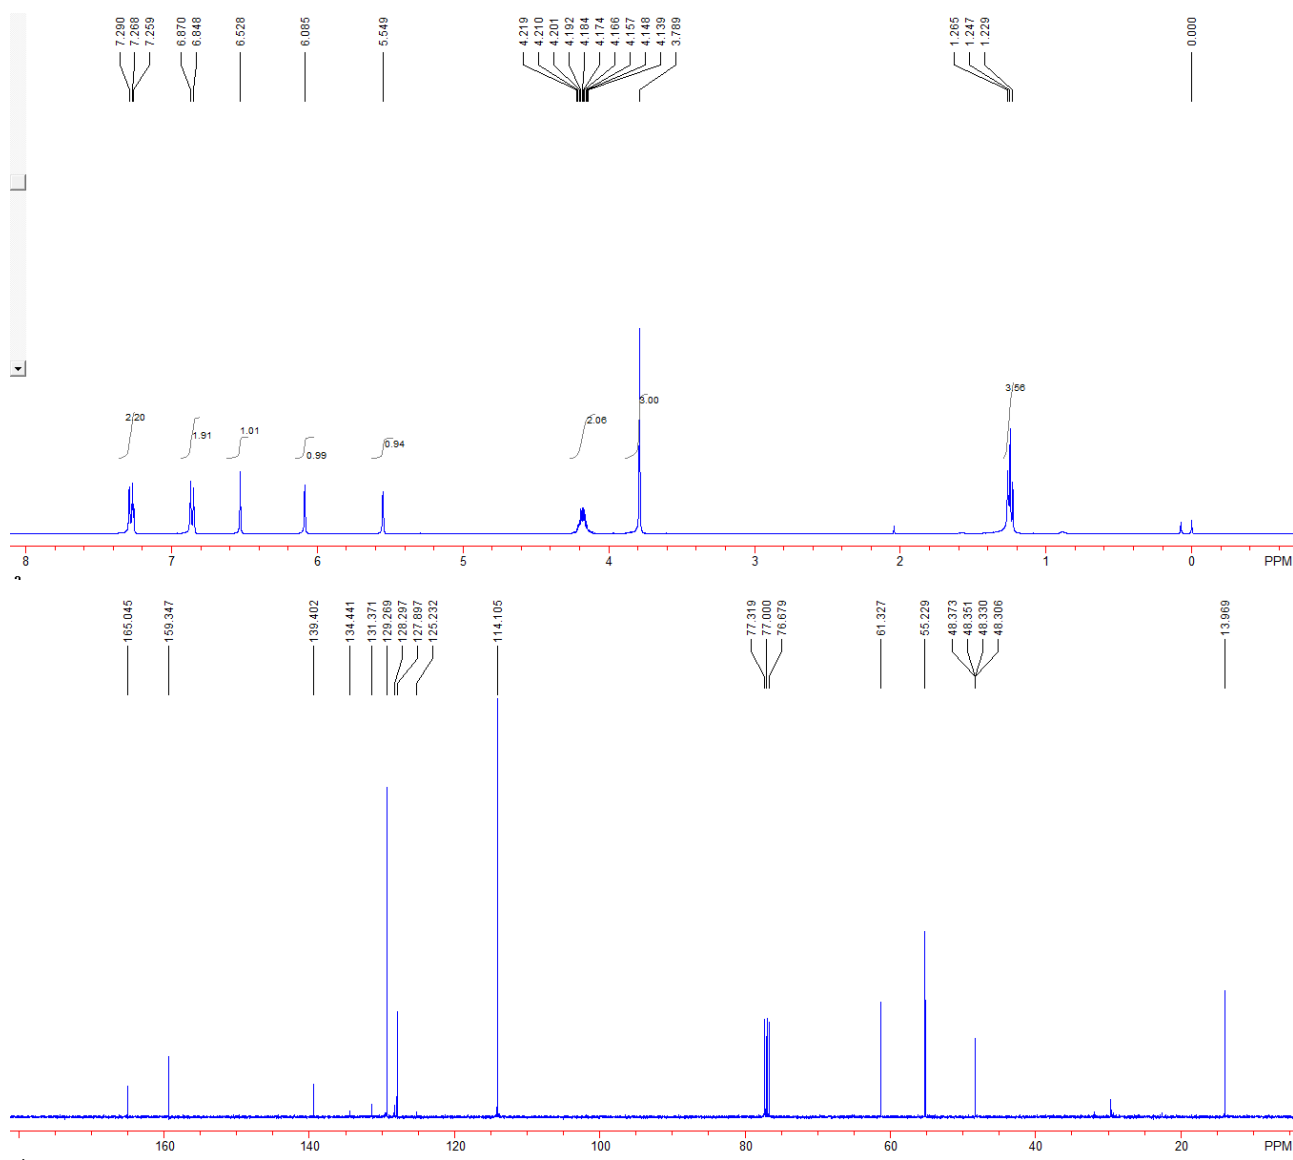



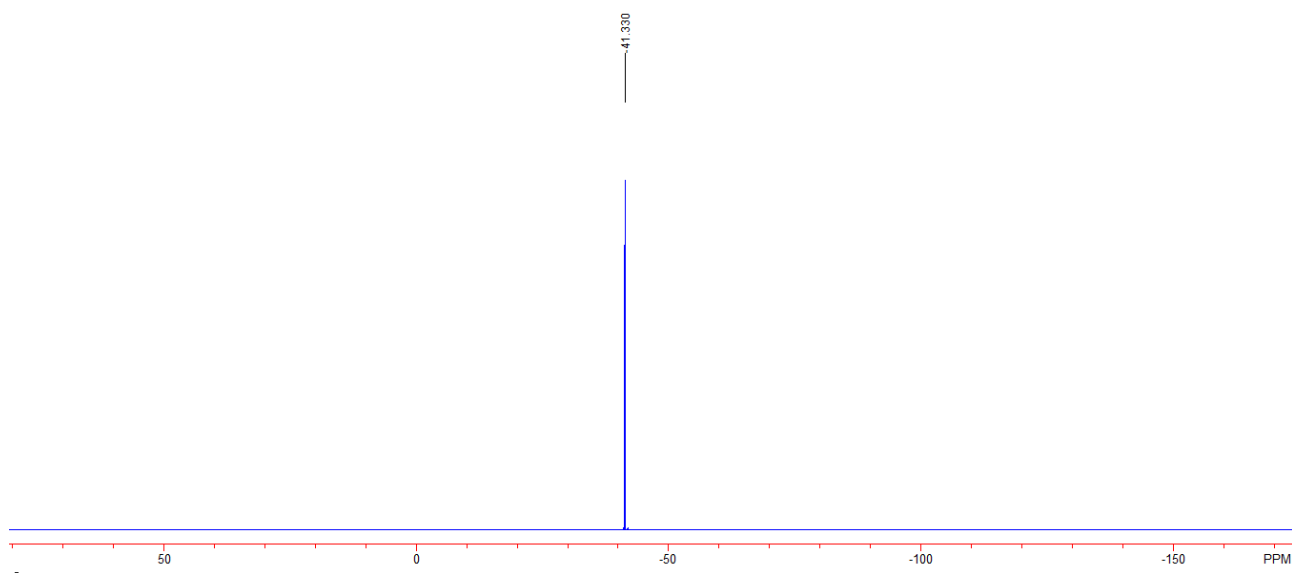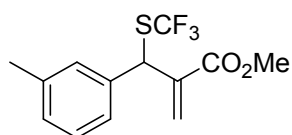

**Compound 4h:** Yield: 49 mg, 84%. A colourless oil. IR (neat)  $\nu$  3008, 2955, 2919, 2854, 1722, 1439, 1331, 1276, 1259, 1235, 1108, 958, 752, 704  $\text{cm}^{-1}$ ;  $^1\text{H}$  NMR (400 MHz,  $\text{CDCl}_3$ , TMS)  $\delta$  2.34 (s, 3H), 3.74 (s, 3H), 5.55 (s, 1H), 6.14 (s, 1H), 6.56 (s, 1H), 7.10 (d,  $J = 7.2$  Hz, 1H), 7.15-7.17 (m, 2H), 7.23 (t,  $J = 7.6$  Hz, 1H);  $^{13}\text{C}$  NMR (100 MHz,  $\text{CDCl}_3$ , TMS)  $\delta$  21.4, 48.7 (q,  $J = 2.0$  Hz), 52.3, 125.1, 128.5, 128.67, 128.68, 129.0, 129.8 (q,  $J = 306.5$  Hz), 137.1, 138.6, 139.0, 165.5;  $^{19}\text{F}$  NMR (376 MHz,  $\text{CDCl}_3$ ,  $\text{CFCl}_3$ )  $\delta$  -41.4; HRMS (EI) Calcd. for  $\text{C}_{13}\text{H}_{13}\text{F}_3\text{O}_2\text{S}$  requires ( $\text{M}^+$ ): 290.0588, Found: 290.0586.

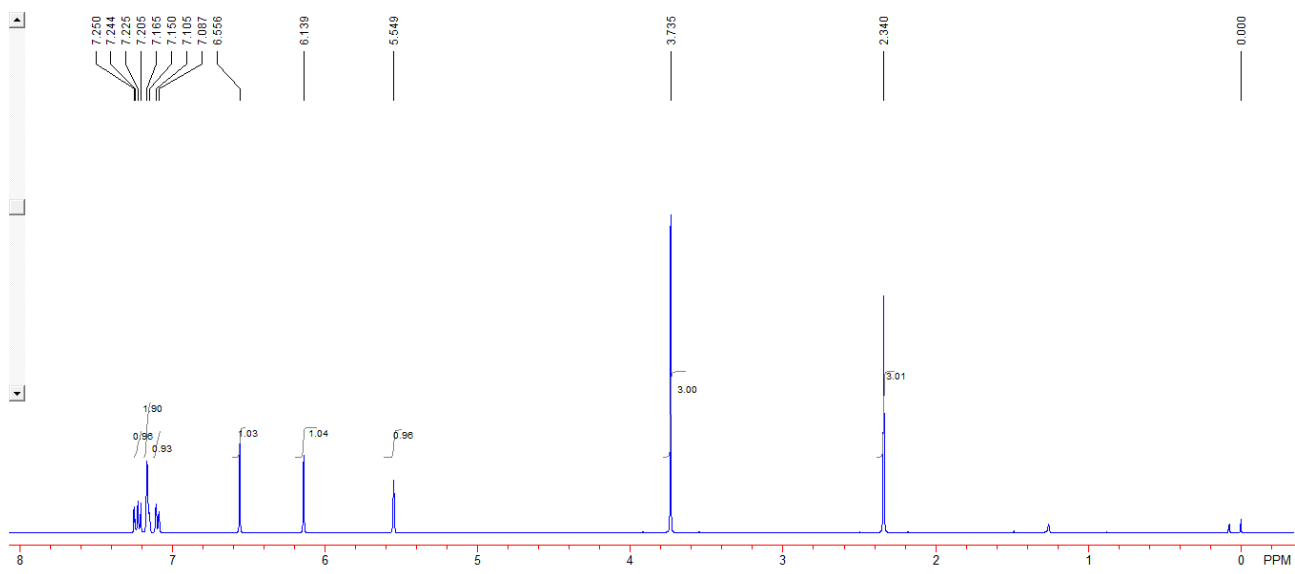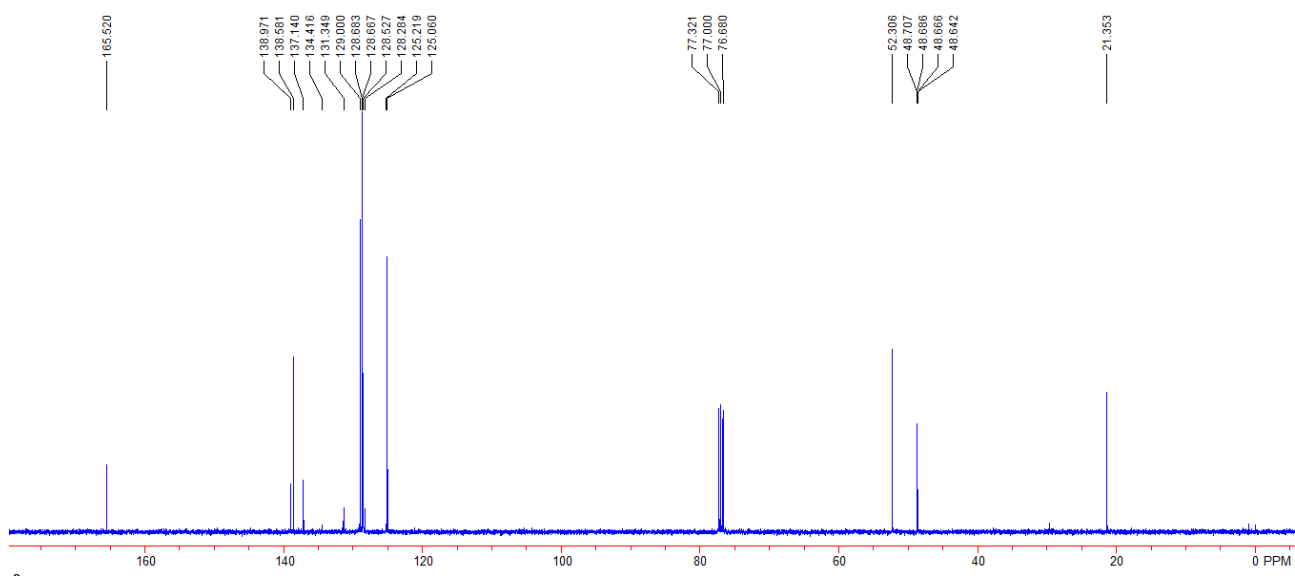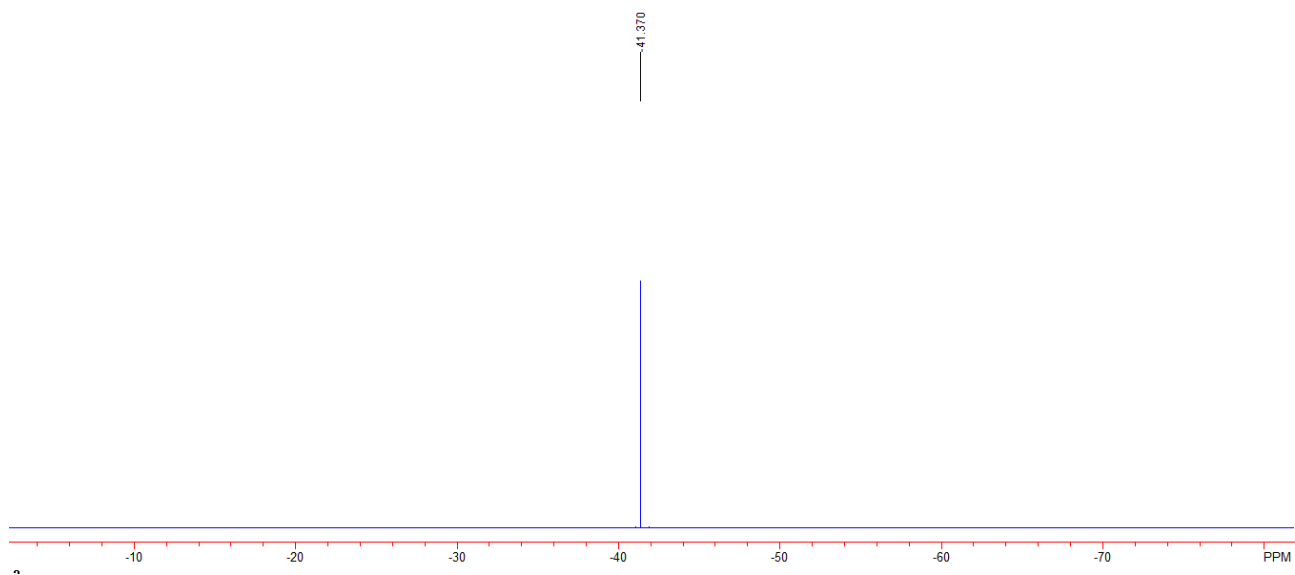

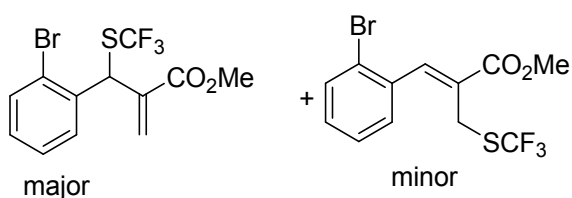

**Compound 4i:** Yield: 56 mg, 79%. A colourless oil. **4i:3i** = 13.0:1. IR (neat)  $\nu$  3008, 2988, 2955, 1725, 1467, 1440, 1276, 1260, 1108, 764, 750  $\text{cm}^{-1}$ ;  $^1\text{H}$  NMR (400 MHz,  $\text{CDCl}_3$ , TMS)  $\delta$  3.76 (s, 3H), 3.88 (s, 3H, minor isomer), 3.90 (s, 2H, minor isomer), 6.04 (brs, 2H), 6.59 (s, 1H), 7.17 (td,  $J = 7.6$  Hz, 1.2 Hz, 1H), 7.32 (t,  $J = 7.6$  Hz, 1H), 7.38-7.39 (m, 2H, minor isomer), 7.48 (dd,  $J = 7.6$  Hz, 1.2 Hz, 2H), 7.60 (d,  $J = 8.0$  Hz, 2H), 7.65 (d,  $J = 8.0$  Hz, 1H, minor isomer), 7.89 (s, 1H, minor isomer);  $^{13}\text{C}$  NMR (100 MHz,  $\text{CDCl}_3$ , TMS)  $\delta$  48.2 (q,  $J = 2.4$  Hz), 52.4, 124.2, 127.7, 129.5 (q,  $J = 307.7$  Hz), 129.6, 129.7, 133.5, 136.5, 137.9, 165.2;  $^{19}\text{F}$  NMR (376 MHz,  $\text{CDCl}_3$ ,  $\text{CFCl}_3$ )  $\delta$  -42.0 (major isomer), -42.2 (minor isomer); HRMS (EI) Calcd. for  $\text{C}_{12}\text{H}_{10}\text{BrF}_3\text{O}_2\text{S}$  requires ( $\text{M}^+$ ): 353.9537, Found: 353.9531.

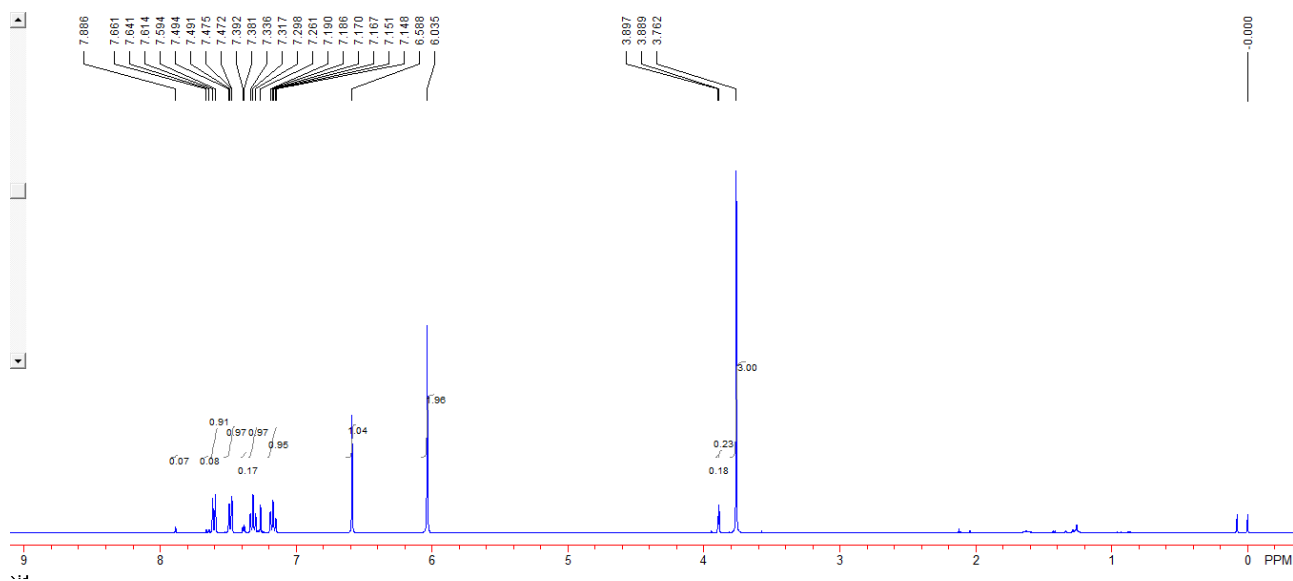

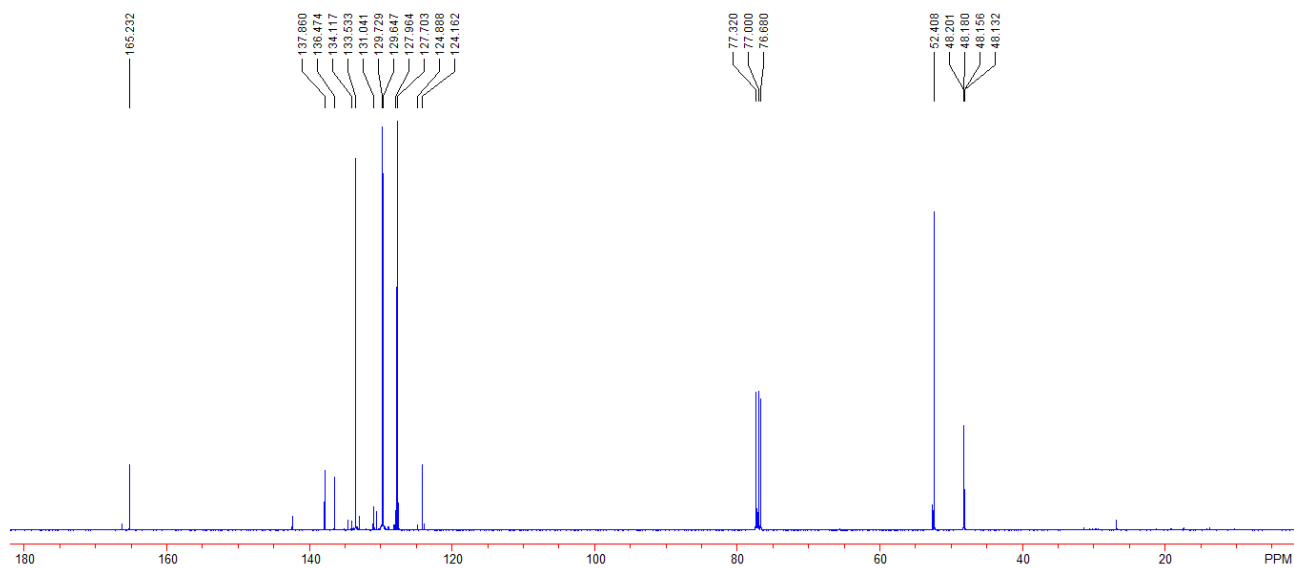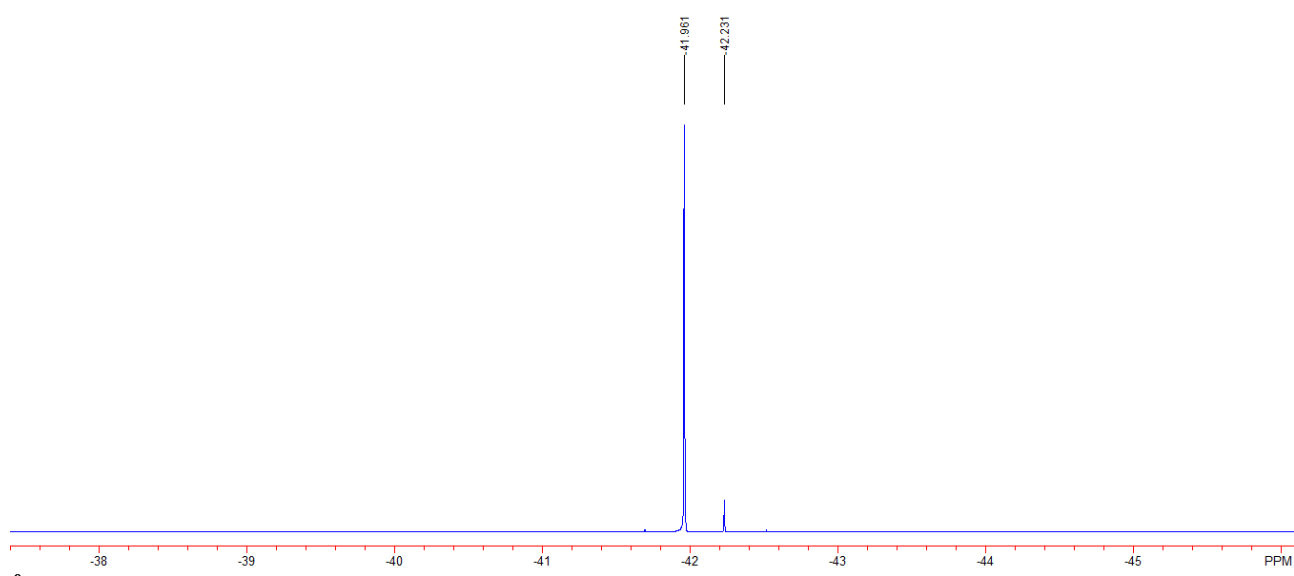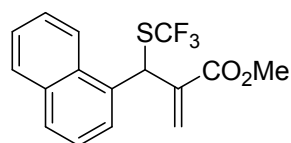

**Compound 4j:** Yield: 53 mg, 81%. A colourless oil. IR (neat)  $\nu$  3061, 3004, 2955, 2854, 1721, 1634, 1511, 1439, 1397, 1327, 1281, 1246, 1106, 962, 802, 778, 755  $\text{cm}^{-1}$ ;  $^1\text{H}$  NMR (400 MHz,  $\text{CDCl}_3$ , TMS)  $\delta$  3.71 (s, 3H), 6.15 (s, 1H), 6.45 (s, 1H), 6.62 (s, 1H), 7.42 (t,  $J = 7.6$  Hz, 1H), 7.52 (t,  $J = 7.2$  Hz, 1H), 7.57-7.63 (m, 2H), 7.80 (d,  $J = 8.0$  Hz, 1H), 7.87 (d,  $J = 8.0$  Hz, 1H), 8.14 (d,  $J = 7.6$  Hz, 1H);  $^{13}\text{C}$  NMR (100 MHz,  $\text{CDCl}_3$ , TMS)  $\delta$  44.6 (q,  $J = 2.4$  Hz), 52.4, 122.7, 125.1, 126.1, 126.2, 127.0, 129.0, 129.3, 129.5, 129.7 (q,  $J = 307.4$  Hz), 130.3, 132.4, 134.1, 138.7, 165.7;  $^{19}\text{F}$

NMR (376 MHz, CDCl<sub>3</sub>, CFC1<sub>3</sub>) δ -41.6; HRMS (EI) Calcd. for C<sub>16</sub>H<sub>13</sub>F<sub>3</sub>O<sub>2</sub>S requires (M<sup>+</sup>):  
326.0588, Found: 326.0583.

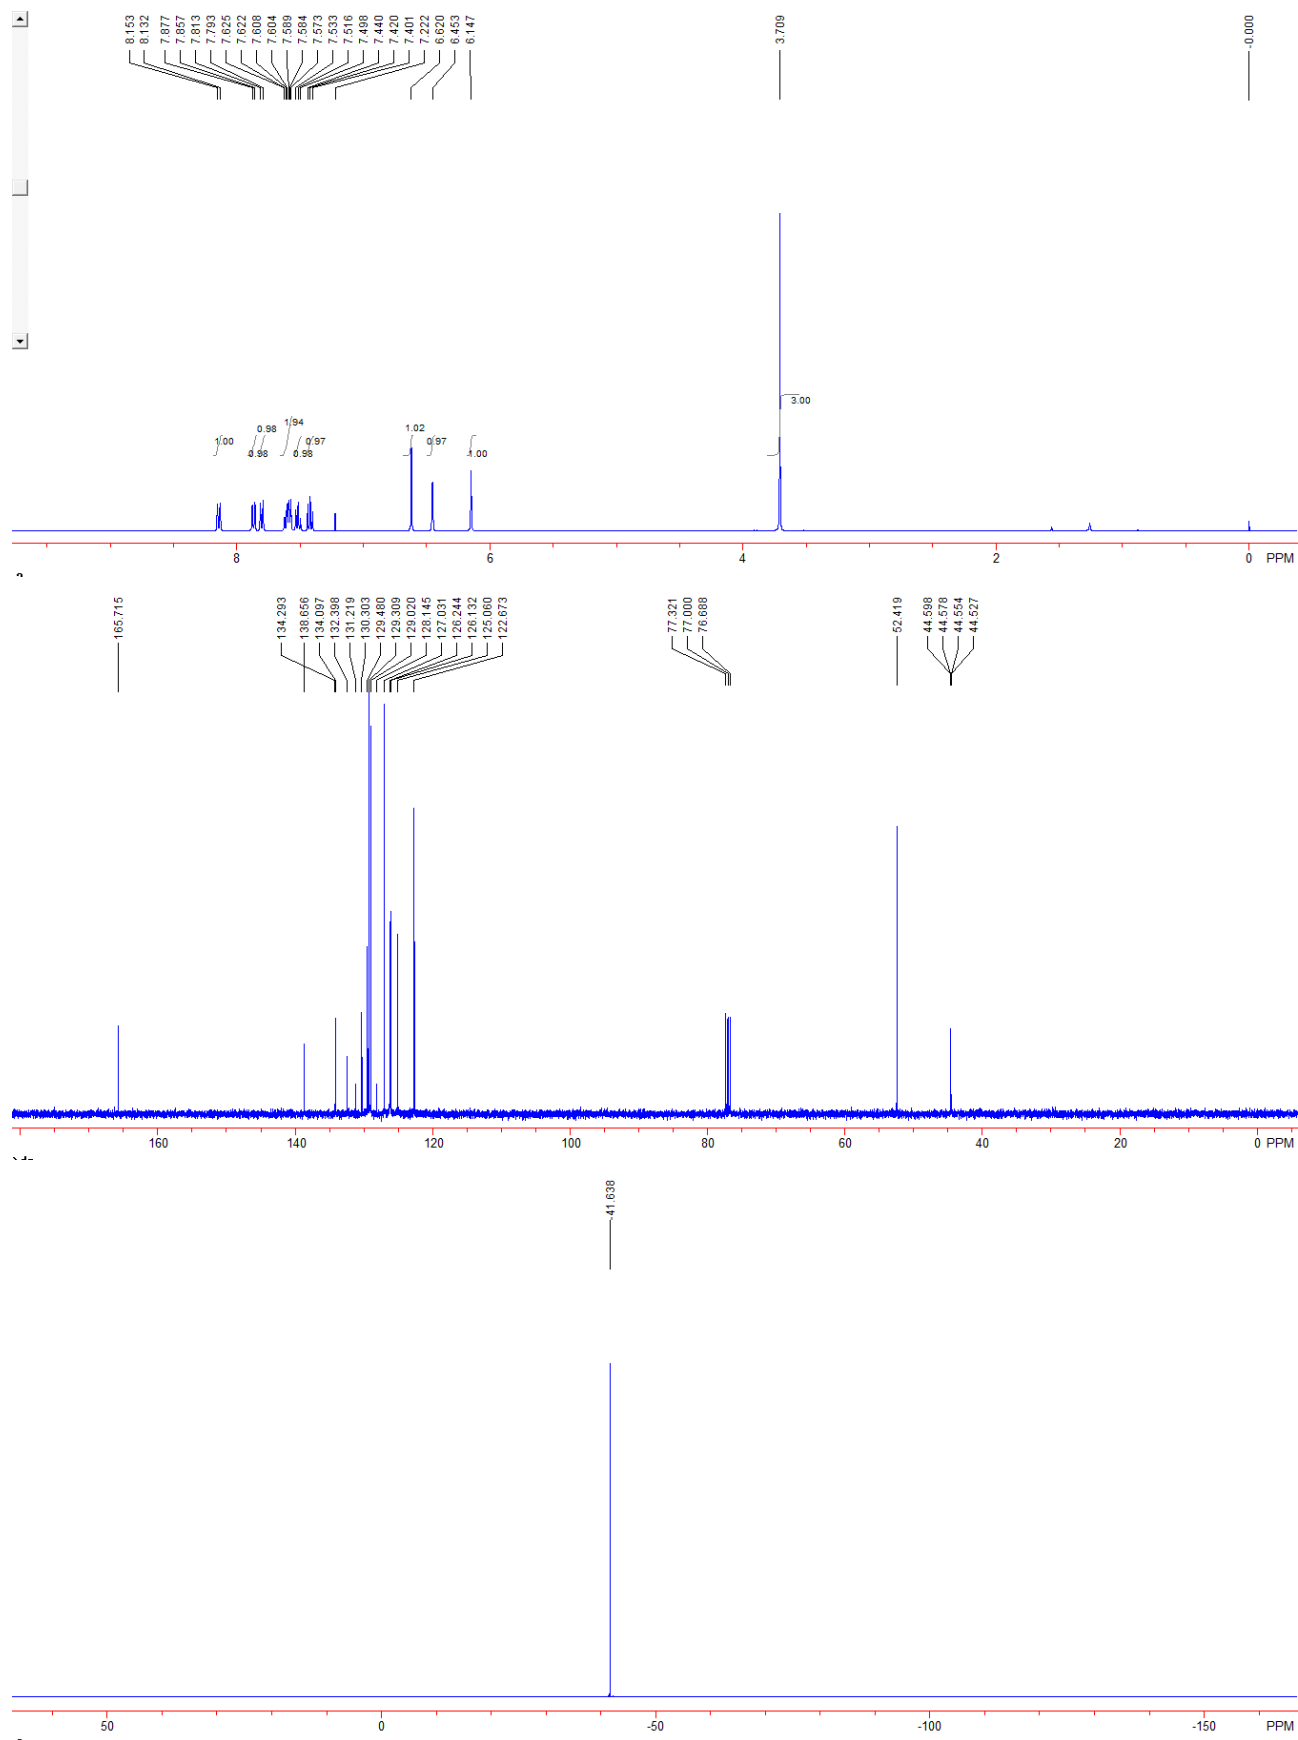

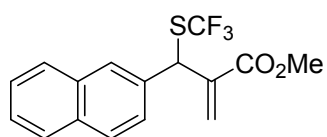

**Compound 4k:** Yield: 50 mg, 77%. A colourless oil. IR (neat)  $\nu$  3061, 3004, 2951, 2923, 1720, 1631, 1508, 1439, 1328, 1275, 1259, 1241, 1102, 962, 861, 815, 752  $\text{cm}^{-1}$ ;  $^1\text{H}$  NMR (400 MHz,  $\text{CDCl}_3$ , TMS)  $\delta$  3.72 (s, 3H), 5.76 (s, 1H), 6.18 (s, 1H), 6.60 (s, 1H), 7.47-7.49 (m, 3H), 7.81-7.83 (m, 4H);  $^{13}\text{C}$  NMR (100 MHz,  $\text{CDCl}_3$ , TMS)  $\delta$  48.9 (q,  $J = 2.0$  Hz), 52.3, 125.8, 126.48, 126.5, 127.1, 127.6, 128.0, 128.8, 129.8 (q,  $J = 306.7$  Hz), 132.9, 133.1, 134.6, 138.9, 165.5;  $^{19}\text{F}$  NMR (376 MHz,  $\text{CDCl}_3$ ,  $\text{CFCl}_3$ )  $\delta$  -41.2; HRMS (EI) Calcd. for  $\text{C}_{16}\text{H}_{13}\text{F}_3\text{O}_2\text{S}$  requires ( $\text{M}^+$ ): 326.0588, Found: 326.0591.

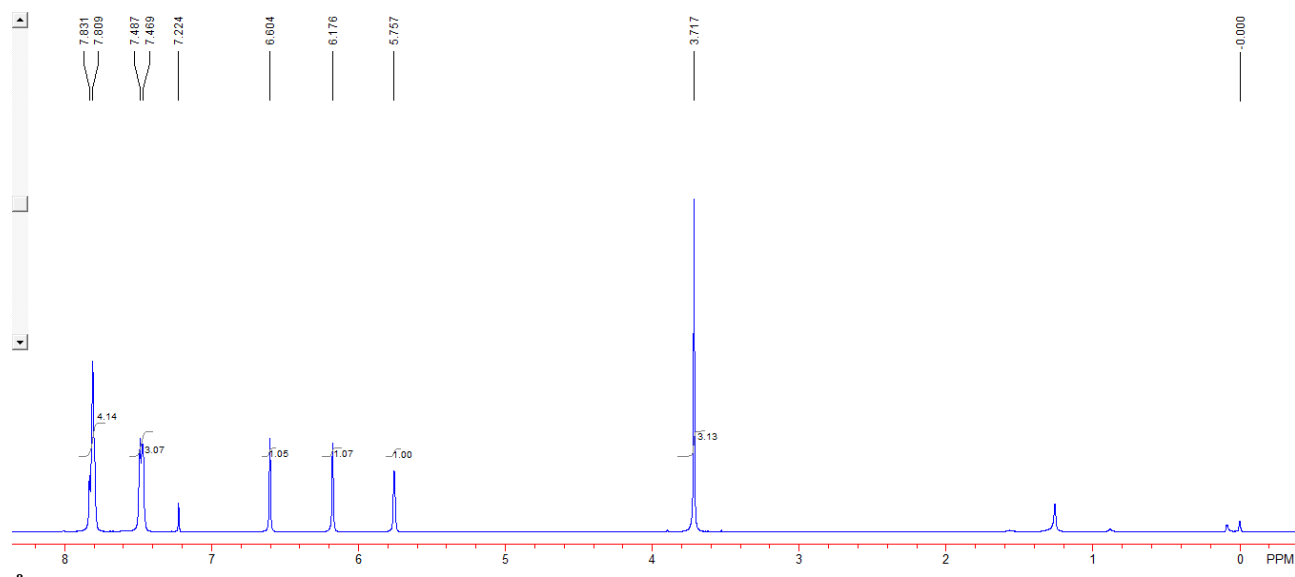

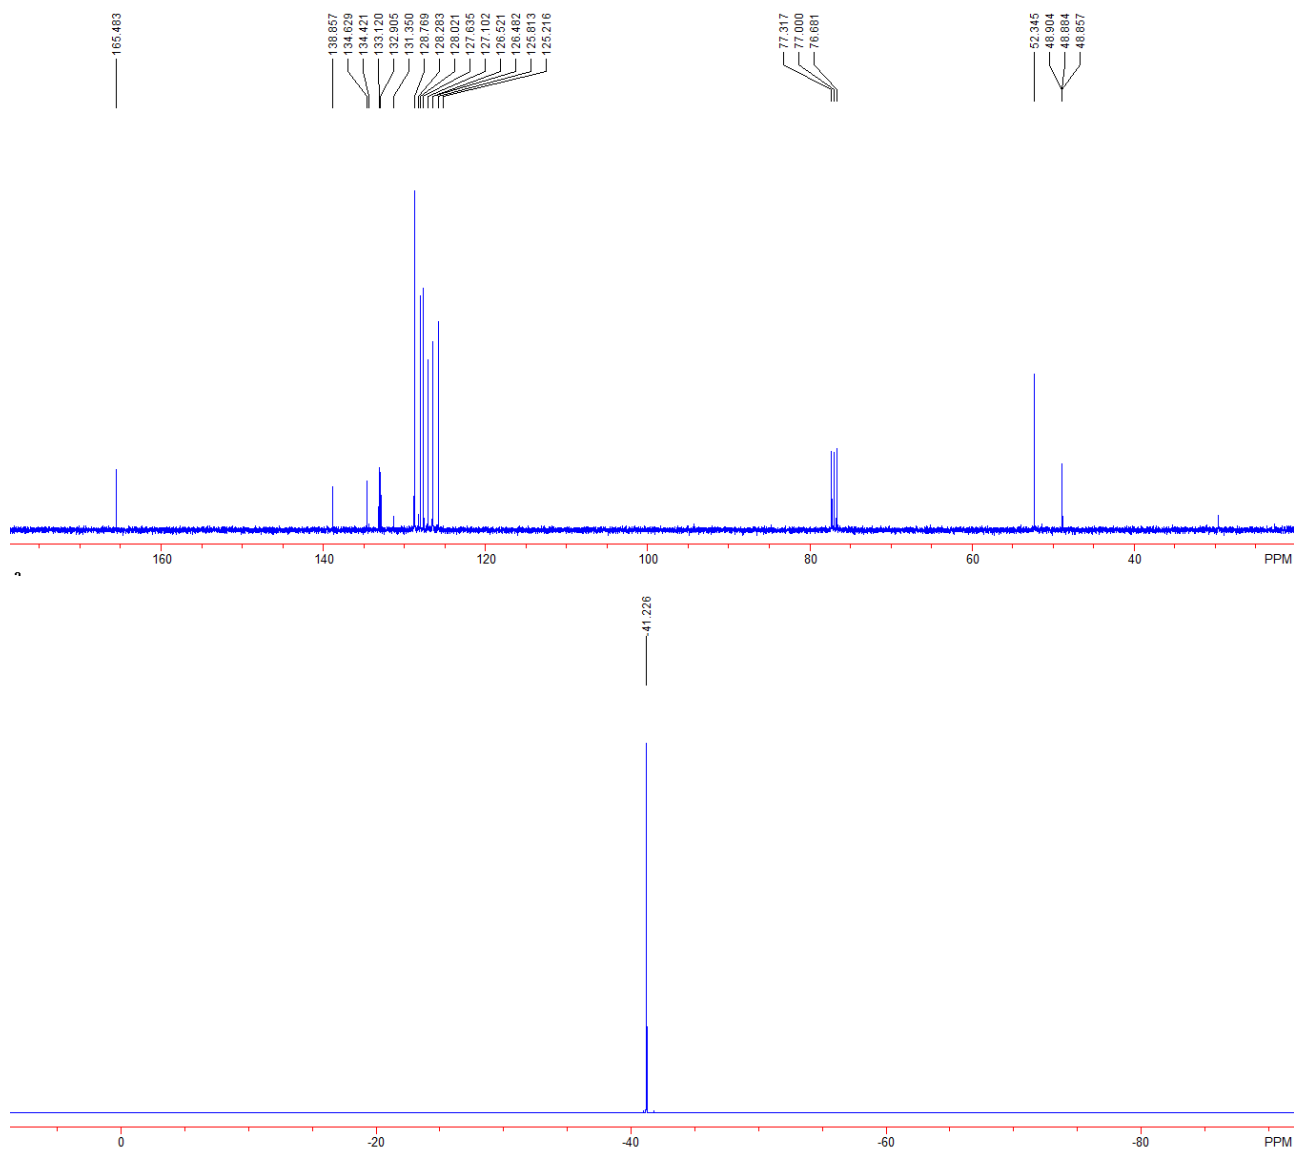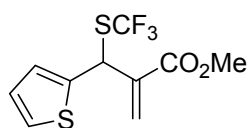

**Compound 4l:** Yield: 34 mg, 60%. A colourless oil. IR (neat)  $\nu$  2955, 2927, 2850, 1724, 1629, 1439, 1332, 1265, 1220, 1110, 702  $\text{cm}^{-1}$ ;  $^1\text{H}$  NMR (400 MHz,  $\text{CDCl}_3$ , TMS)  $\delta$  3.79 (s, 3H), 5.78 (s, 1H), 6.14 (s, 1H), 6.54 (s, 1H), 6.95 (t,  $J = 4.4$  Hz, 1H), 7.04 (d,  $J = 0.8$  Hz, 1H), 7.27 (d,  $J = 5.6$  Hz, 1H);  $^{13}\text{C}$  NMR (100 MHz,  $\text{CDCl}_3$ , TMS)  $\delta$  44.1 (q,  $J = 2.6$  Hz), 52.5, 126.3, 127.06, 127.07, 128.8, 129.8 (q,  $J = 307.5$  Hz), 139.2, 141.0, 165.2;  $^{19}\text{F}$  NMR (376 MHz,  $\text{CDCl}_3$ ,  $\text{CFCl}_3$ )  $\delta$  -41.6; HRMS (EI) Calcd. for  $\text{C}_{10}\text{H}_9\text{F}_3\text{O}_2\text{S}_2$  requires ( $\text{M}^+$ ): 281.9996, Found: 281.9992.

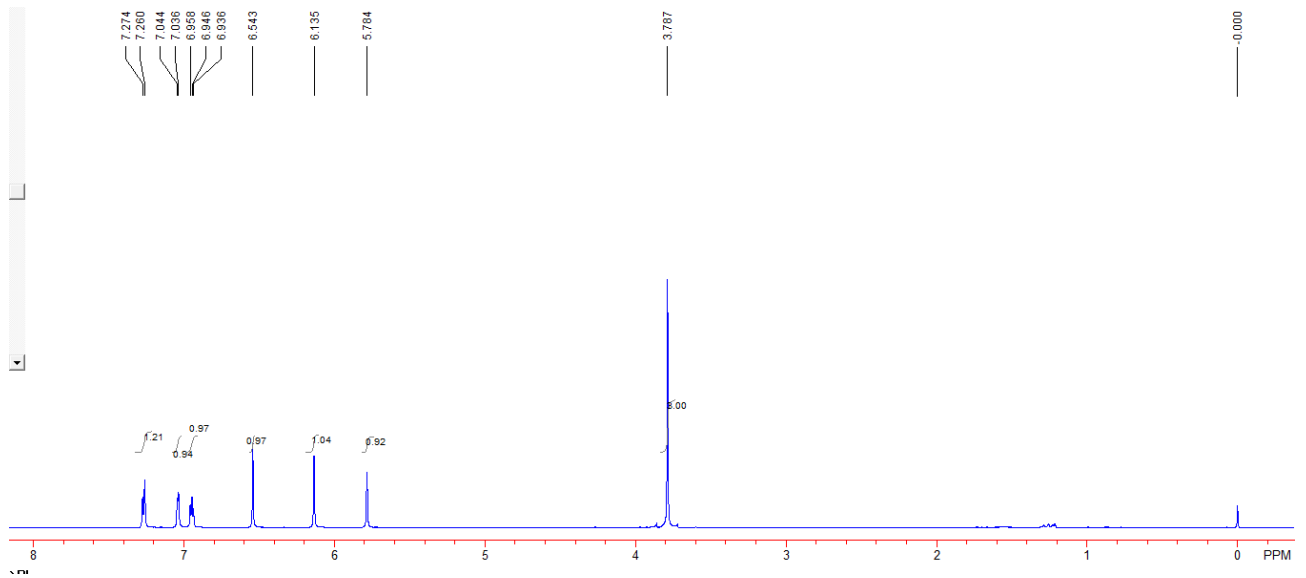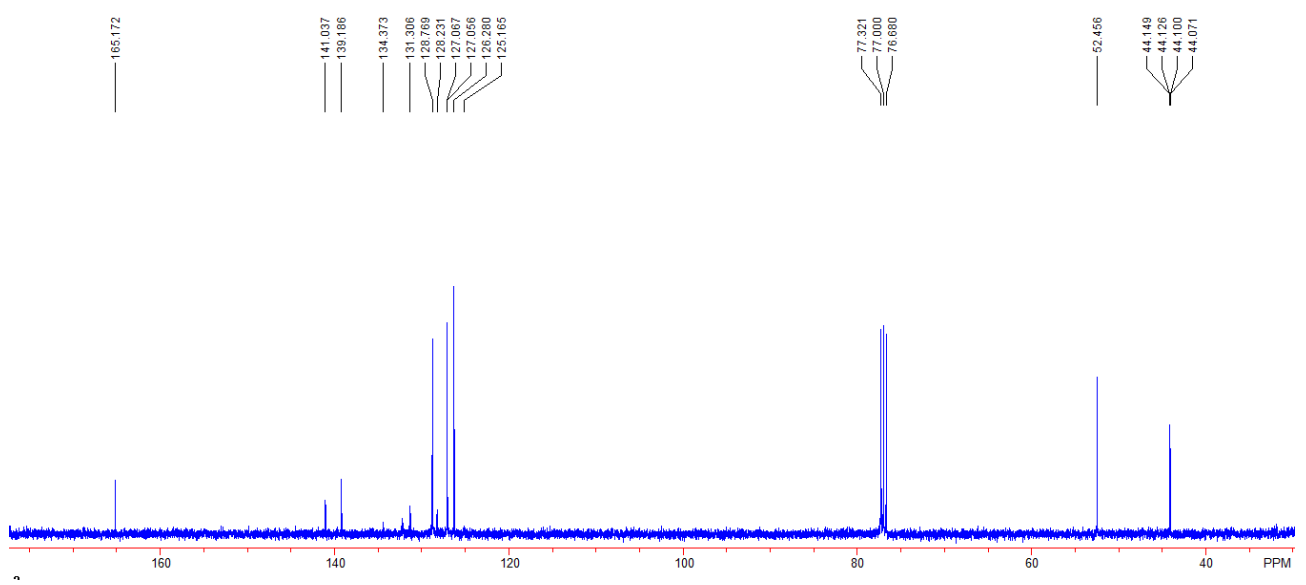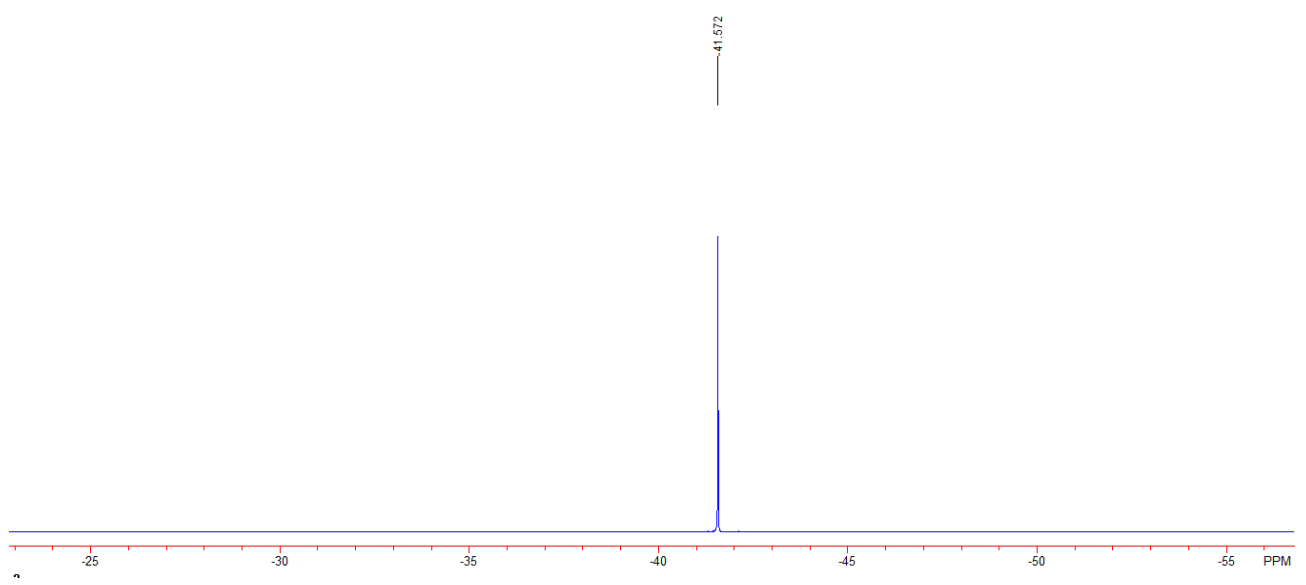



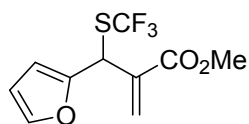

**Compound 4m:** Yield: 14 mg, 26%. A colourless oil. IR (neat)  $\nu$  2955, 2925, 2854, 1727, 1439, 1261, 1214, 1112, 1014, 955, 817, 737  $\text{cm}^{-1}$ ;  $^1\text{H}$  NMR (400 MHz,  $\text{CDCl}_3$ , TMS)  $\delta$  3.80 (s, 3H), 5.61 (s, 1H), 6.11 (s, 1H), 6.32-6.35 (m, 2H), 6.54 (s, 1H), 7.40 (brs, 1H);  $^{13}\text{C}$  NMR (100 MHz,  $\text{CDCl}_3$ , TMS)  $\delta$  41.7 (q,  $J = 2.8$  Hz), 52.5, 109.2, 110.7, 129.6, 129.9 (q,  $J = 306.5$  Hz), 136.8, 143.2, 149.9, 165.2;  $^{19}\text{F}$  NMR (376 MHz,  $\text{CDCl}_3$ ,  $\text{CFCl}_3$ )  $\delta$  -41.5; HRMS (EI) Calcd. for  $\text{C}_{10}\text{H}_9\text{F}_3\text{O}_3\text{S}$  requires ( $\text{M}^+$ ): 266.0225, Found: 266.0230.

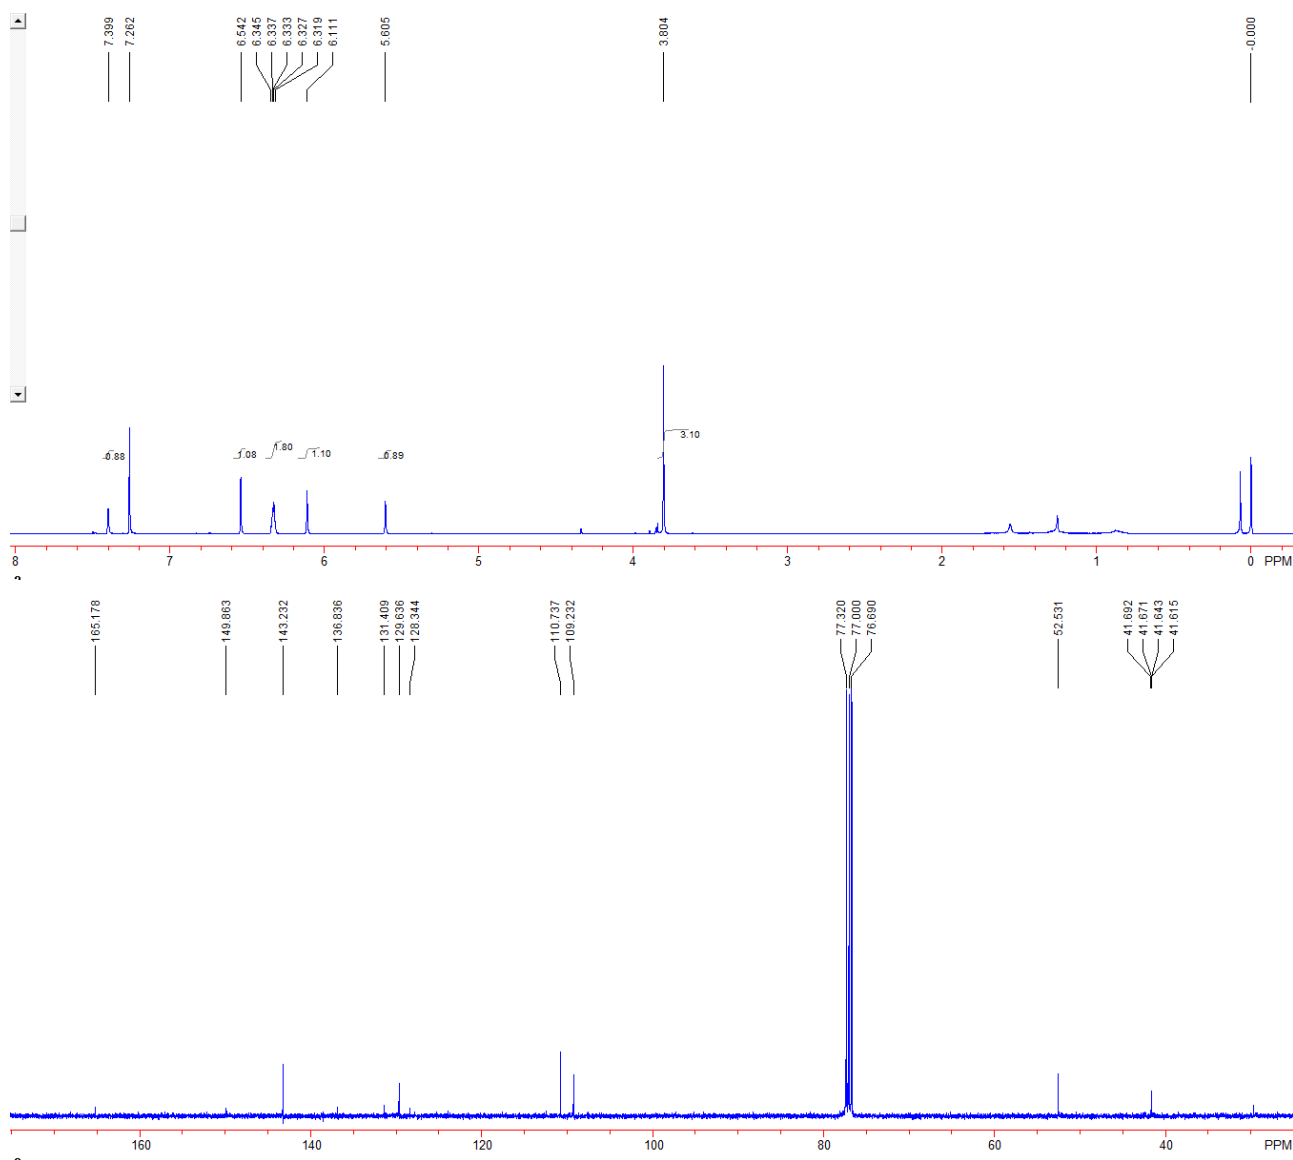

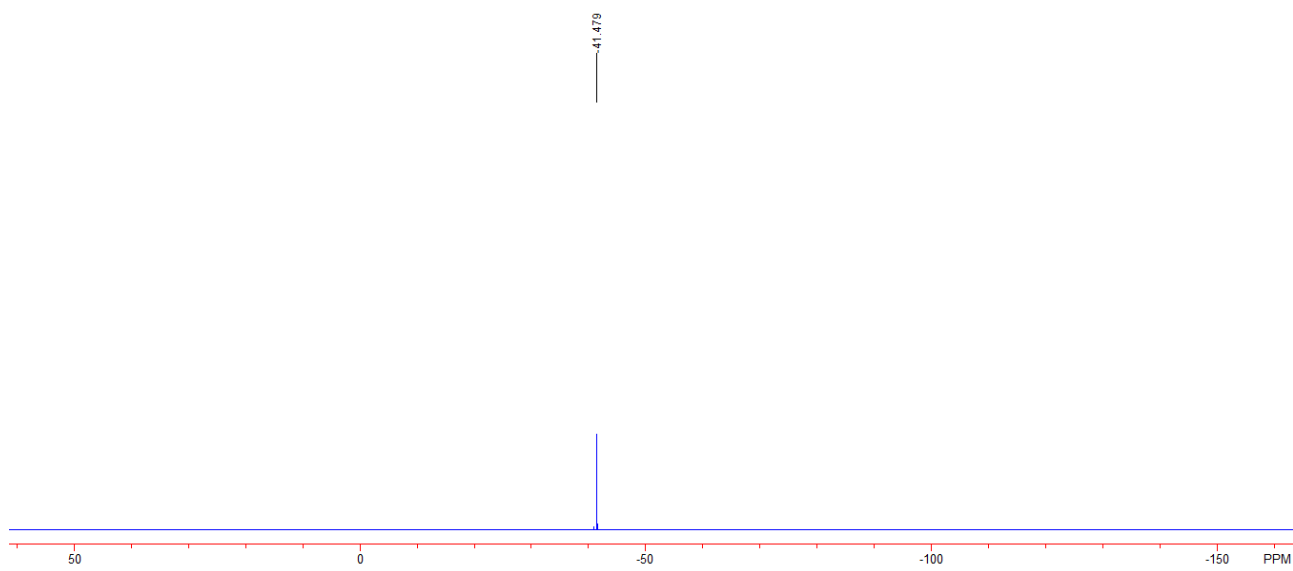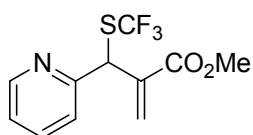

**Compound 4n:** Yield: 28 mg, 51%. A colourless oil. IR (neat)  $\nu$  2960, 2926, 2850, 1720, 1588, 1470, 1436, 1312, 1240, 1112, 996, 749  $\text{cm}^{-1}$ ;  $^1\text{H}$  NMR (400 MHz,  $\text{CDCl}_3$ , TMS)  $\delta$  3.76 (s, 3H), 5.64 (s, 1H), 6.25 (s, 1H), 6.55 (s, 1H), 7.21 (dd,  $J = 6.8$  Hz, 4.8 Hz, 1H), 7.48 (d,  $J = 8.0$  Hz, 1H), 7.69 (td,  $J = 7.6$  Hz, 2.0 Hz, 1H), 8.56 (d,  $J = 4.4$  Hz, 1H);  $^{13}\text{C}$  NMR (100 MHz,  $\text{CDCl}_3$ , TMS)  $\delta$  49.9 (q,  $J = 2.6$  Hz), 52.3, 122.6, 122.8, 129.6, 130.3 (q,  $J = 305.5$  Hz), 137.0, 138.4, 149.6, 157.1, 165.6;  $^{19}\text{F}$  NMR (376 MHz,  $\text{CDCl}_3$ ,  $\text{CFCl}_3$ )  $\delta$  -41.4; HRMS (EI) Calcd. for  $\text{C}_{11}\text{H}_{10}\text{F}_3\text{NO}_2\text{S}$  requires ( $\text{M}^+$ ): 277.0384, Found: 277.0380.

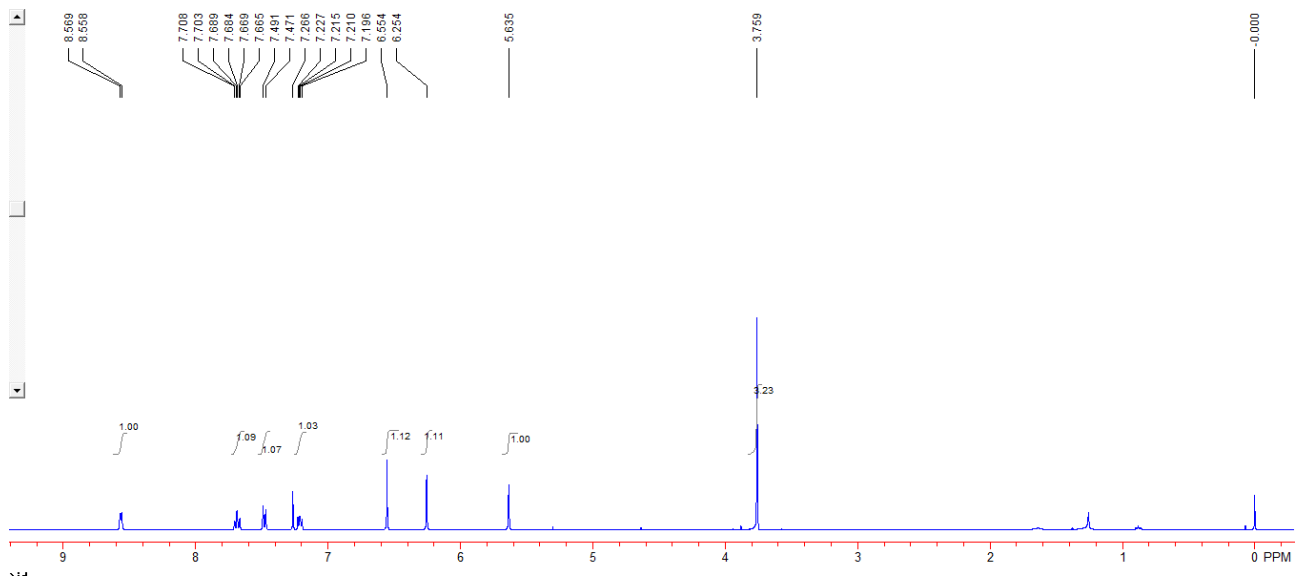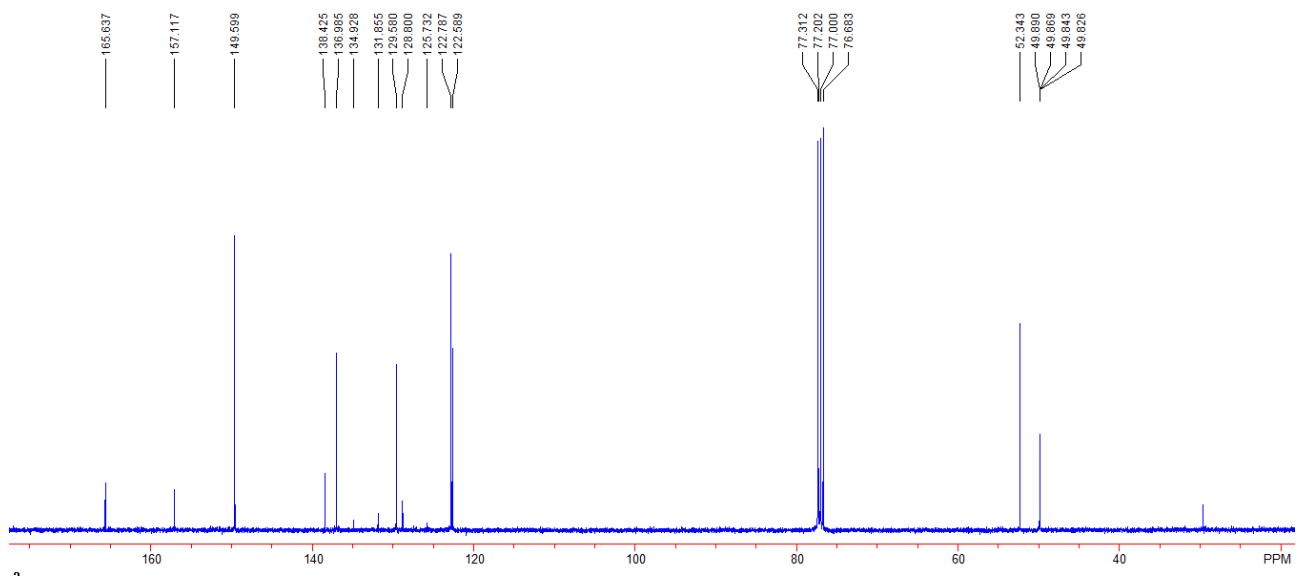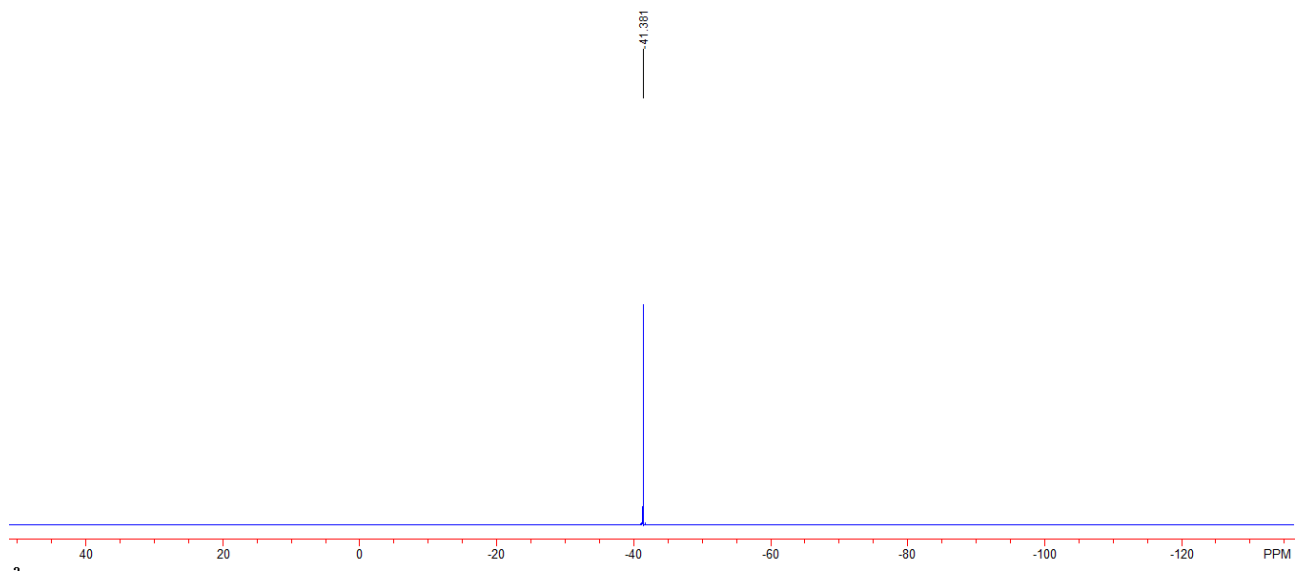

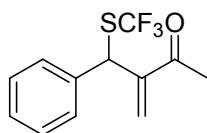

**Compound 4o:** Yield: 19 mg, 37%. A colourless oil. IR (neat)  $\nu$  2964, 2927, 2850, 1682, 1366, 1275, 1260, 1114, 954, 764, 750, 697  $\text{cm}^{-1}$ ;  $^1\text{H}$  NMR (400 MHz,  $\text{CDCl}_3$ , TMS)  $\delta$  2.36 (s, 3H), 5.69 (s, 1H), 6.32 (s, 1H), 6.39 (s, 1H), 7.26-7.37 (m, 5H);  $^{13}\text{C}$  NMR (100 MHz,  $\text{CDCl}_3$ , TMS)  $\delta$  26.1, 47.1 (q,  $J = 2.6$  Hz), 127.9, 128.0, 128.4, 128.8, 129.8 (q,  $J = 306.7$  Hz), 137.8, 147.2, 196.8;  $^{19}\text{F}$  NMR (376 MHz,  $\text{CDCl}_3$ ,  $\text{CFCl}_3$ )  $\delta$  -41.5; HRMS (EI) Calcd. for  $\text{C}_{12}\text{H}_{11}\text{F}_3\text{OS}$  requires ( $\text{M}^+$ ): 260.0483, Found: 260.0479.

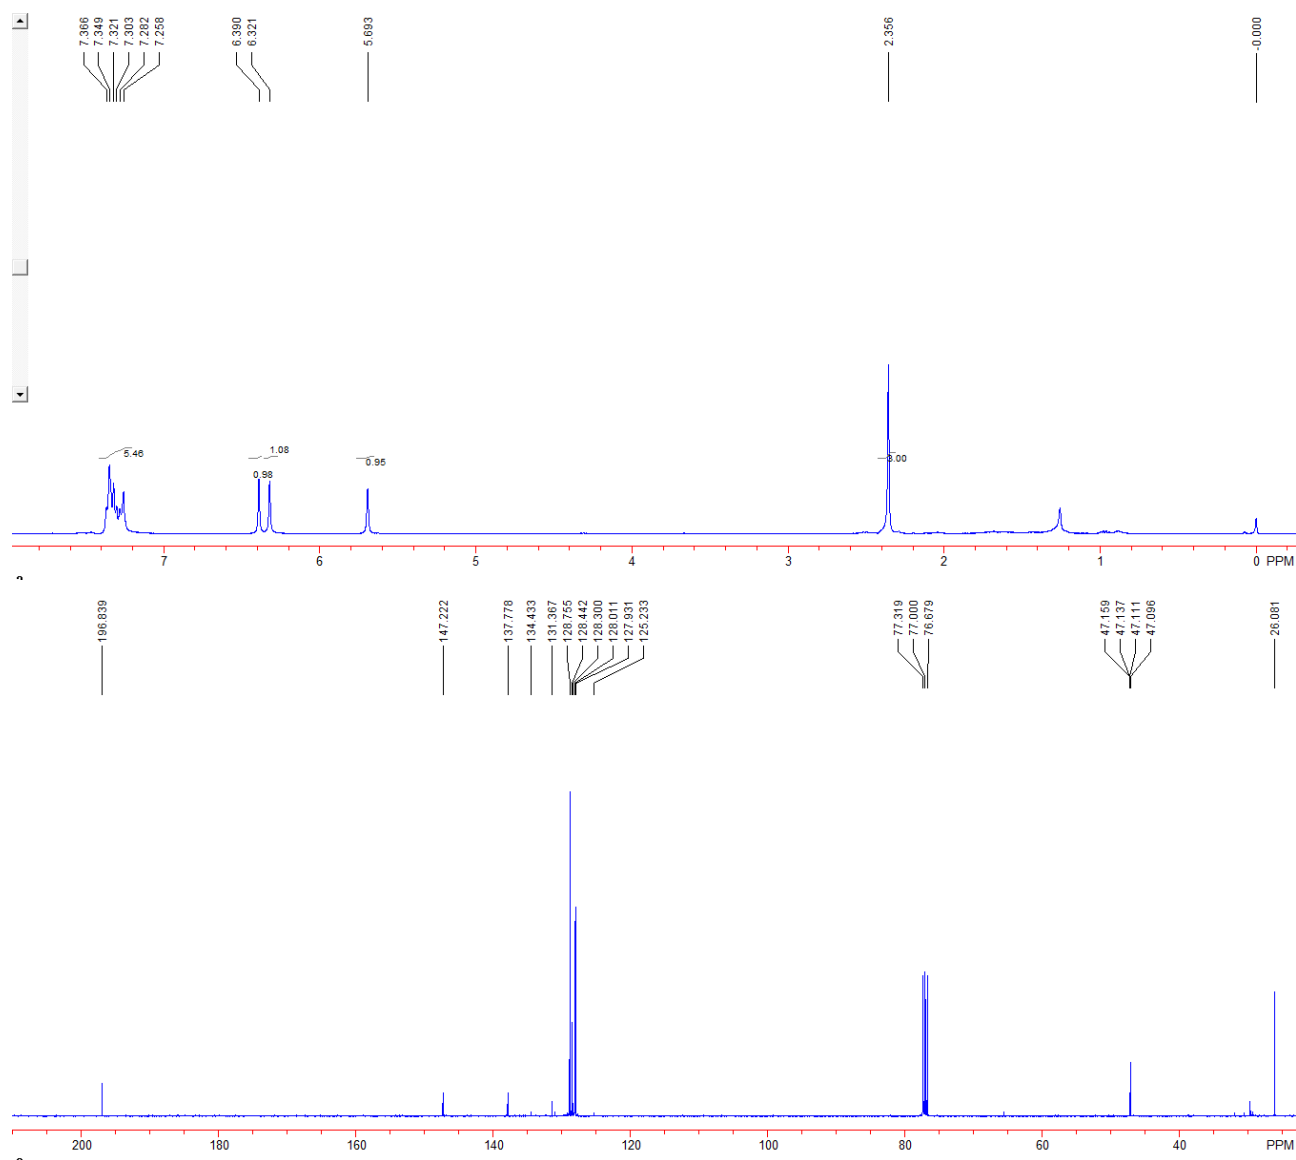

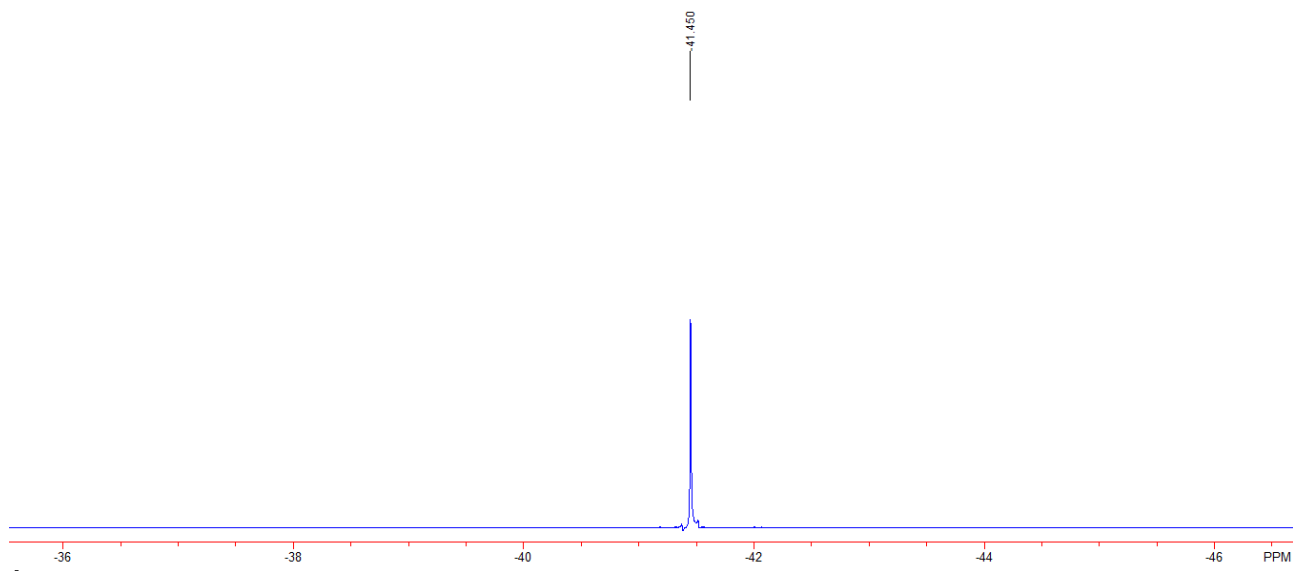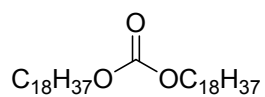

**Compound 5a:** A white solid.  $^1H$  NMR (400 MHz,  $CDCl_3$ , TMS)  $\delta$  0.88 (t,  $J = 6.8$  Hz, 3H), 1.26-1.37 (m, 30H), 1.66 (quint,  $J = 6.8$  Hz, 2H), 4.12 (t,  $J = 6.8$  Hz, 2H);  $^{13}C$  NMR (100 MHz,  $CDCl_3$ , TMS)  $\delta$  14.1, 22.7, 25.7, 28.7, 29.2, 29.4, 29.5, 29.56, 29.63, 29.67, 29.69, 29.70, 31.9, 68.0, 155.4; HRMS (MALDI) Calcd. for  $C_{37}H_{74}O_3$  requires ( $M^++H$ ): 567.5711, Found: 567.5705.

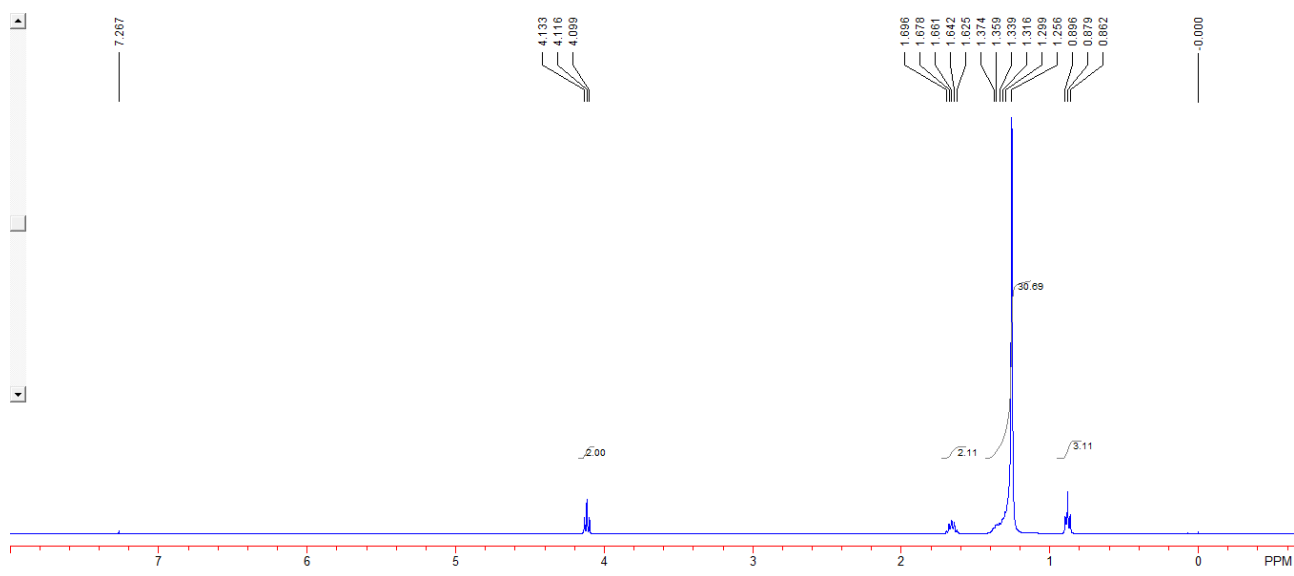

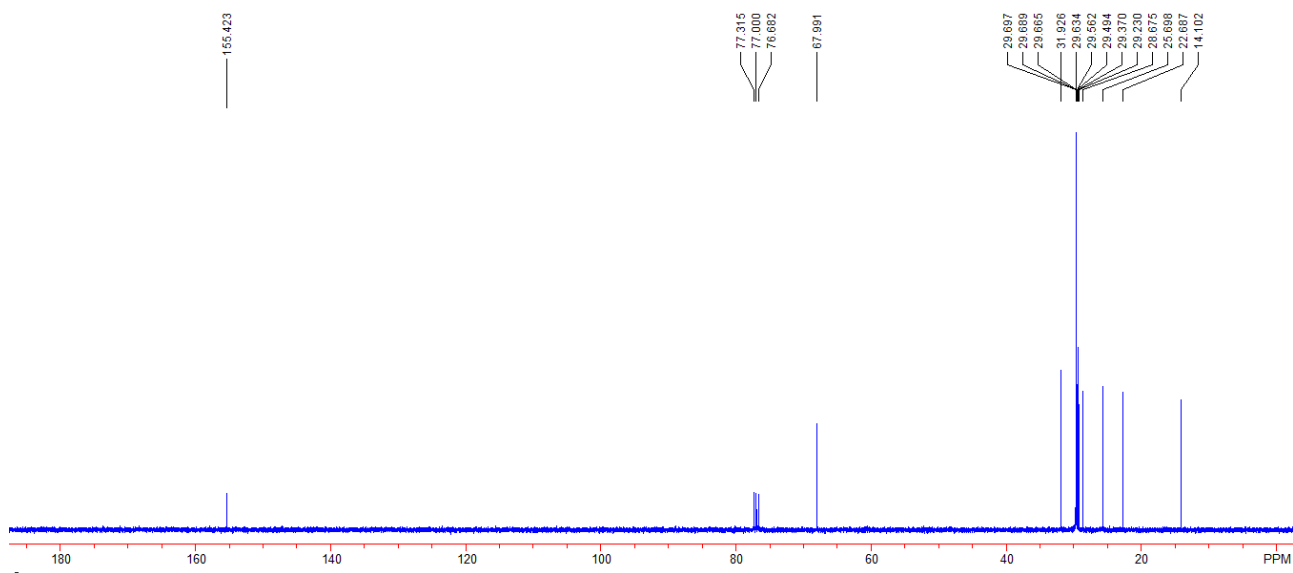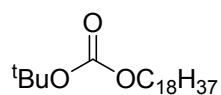

**Compound 6a:** white solid.  $^1\text{H}$  NMR (400 MHz,  $\text{CDCl}_3$ , TMS)  $\delta$  0.88 (t,  $J = 6.8$  Hz, 3H), 1.26-1.35 (m, 30H), 1.49 (s, 9H), 1.65 (quint,  $J = 6.8$  Hz, 2H), 4.05 (t,  $J = 6.8$  Hz, 2H);  $^{13}\text{C}$  NMR (100 MHz,  $\text{CDCl}_3$ , TMS)  $\delta$  14.1, 22.7, 25.7, 27.8, 28.7, 29.2, 29.4, 29.5, 29.55, 29.62, 29.64, 29.67, 29.69, 31.9, 67.2, 81.7, 153.7; HRMS (ESI) Calcd. for  $\text{C}_{23}\text{H}_{46}\text{O}_3$  requires ( $\text{M}^+ + \text{NH}_4$ ): 388.3785, Found: 388.3787.

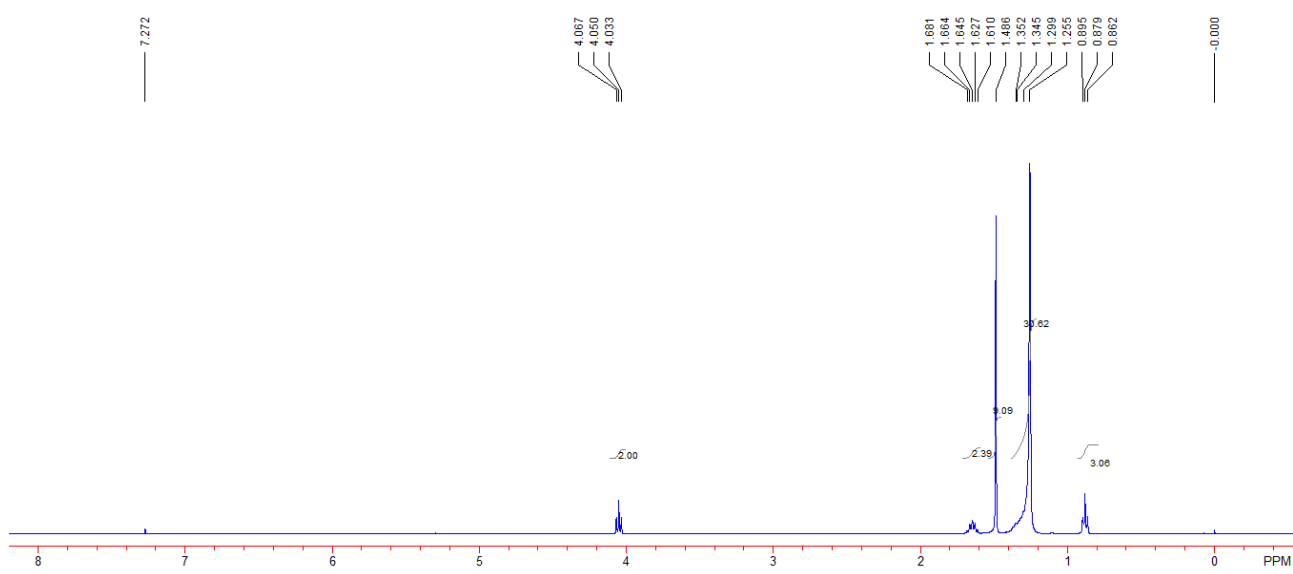

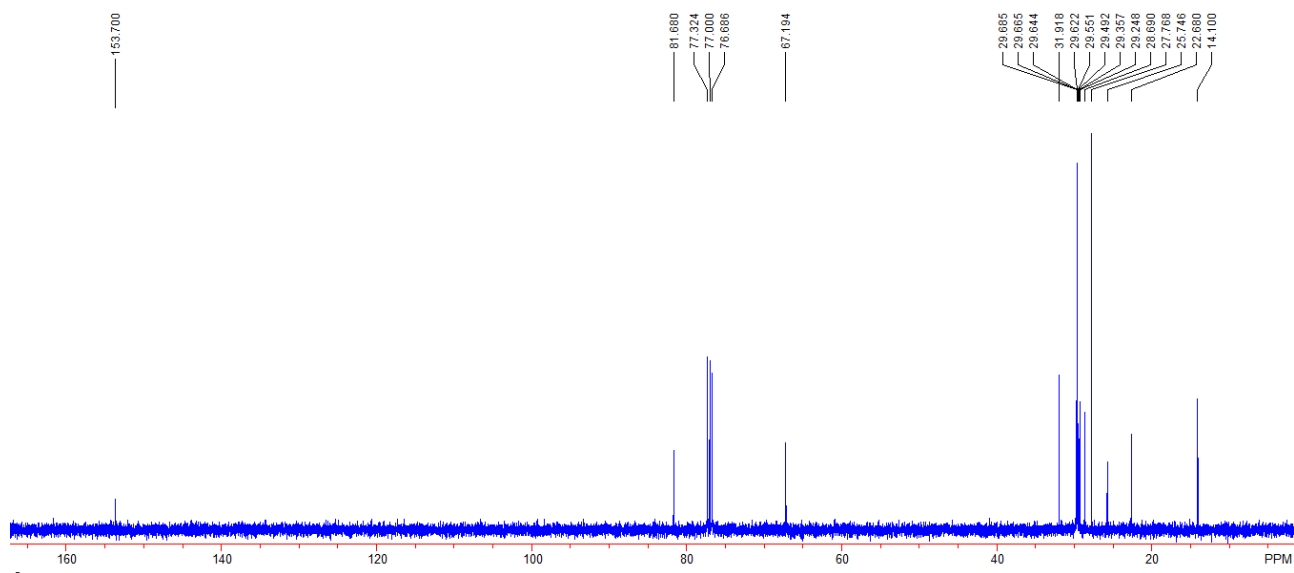

### Procedure for the conversion of product 4a.

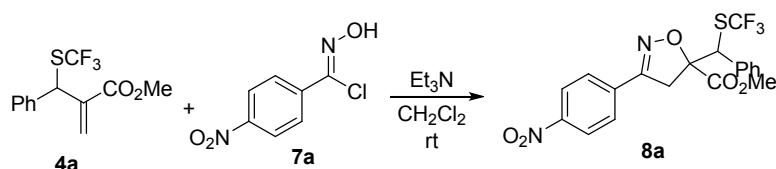

Compound **4a** (55 mg, 0.2 mmol), *N*-hydroxy-4-nitrobenzimidoyl chloride **7a** (60 mg, 0.3 mmol), and Et<sub>3</sub>N (42  $\mu$ L, 0.3 mmol) were stirred in 2 mL of CH<sub>2</sub>Cl<sub>2</sub> at rt. The solvent was removed under reduced pressure and the residue was purified by column chromatography (silica gel, ethyl acetate: petroleum ether = 1: 5) to give compound **8a** (46 mg, 52%).

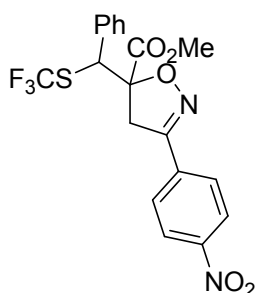

**Compound 8a:** Yield: 46 mg, 52%. A white solid. m. p.: 148-152  $^{\circ}$ C. IR (neat)  $\nu$  2955, 2923, 2850, 1762, 1739, 1599, 1584, 1521, 1436, 1344, 1275, 1260, 1153, 1107, 1081, 914, 850, 825, 765, 751, 699  $\text{cm}^{-1}$ ; <sup>1</sup>H NMR (400 MHz, CDCl<sub>3</sub>, TMS)  $\delta$  3.44 (d, *J* = 17.6 Hz, 1H, minor isomer), 3.55 (s, 3H), 3.71 (d, *J* = 17.6 Hz, 1H, minor isomer),

3.86 (s, 3H, minor isomer), 3.88 (d,  $J = 17.6$  Hz, 1H), 3.95 (d,  $J = 17.6$  Hz, 1H), 4.82 (s, 1H), 4.92 (s, 1H, minor isomer), 7.30-7.38 (m, 3H), 7.43-7.44 (m, 2H, minor isomer), 7.47-7.49 (m, 2H), 7.67 (d,  $J = 8.8$  Hz, 2H, minor isomer), 7.82 (d,  $J = 8.8$  Hz, 2H), 8.20 (d,  $J = 9.2$  Hz, 2H, minor isomer), 8.28 (d,  $J = 8.4$  Hz, 2H);  $^{13}\text{C}$  NMR (100 MHz,  $\text{CDCl}_3$ , TMS)  $\delta$  42.6, 43.6, 53.1 (q,  $J = 2.0$  Hz), 53.2, 53.6, 54.9 (q,  $J = 2.0$  Hz), 91.8, 91.9, 124.0, 124.1, 127.5, 127.7, 128.6, 128.7, 128.86, 128.89, 129.0, 129.1, 130.1 (q,  $J = 306.0$  Hz), 130.4 (q,  $J = 305.8$  Hz), 133.9, 134.0, 135.5, 136.5, 148.7, 148.9, 154.8, 155.1, 169.7, 170.2;  $^{19}\text{F}$  NMR (376 MHz,  $\text{CDCl}_3$ ,  $\text{CFCl}_3$ )  $\delta$  -40.3 (major isomer), -41.0 (minor isomer); HRMS (MALDI) Calcd. for  $\text{C}_{19}\text{H}_{16}\text{F}_3\text{N}_2\text{O}_5\text{S}$  requires ( $\text{M}^++\text{H}$ ): 441.0732, Found: 441.0718.

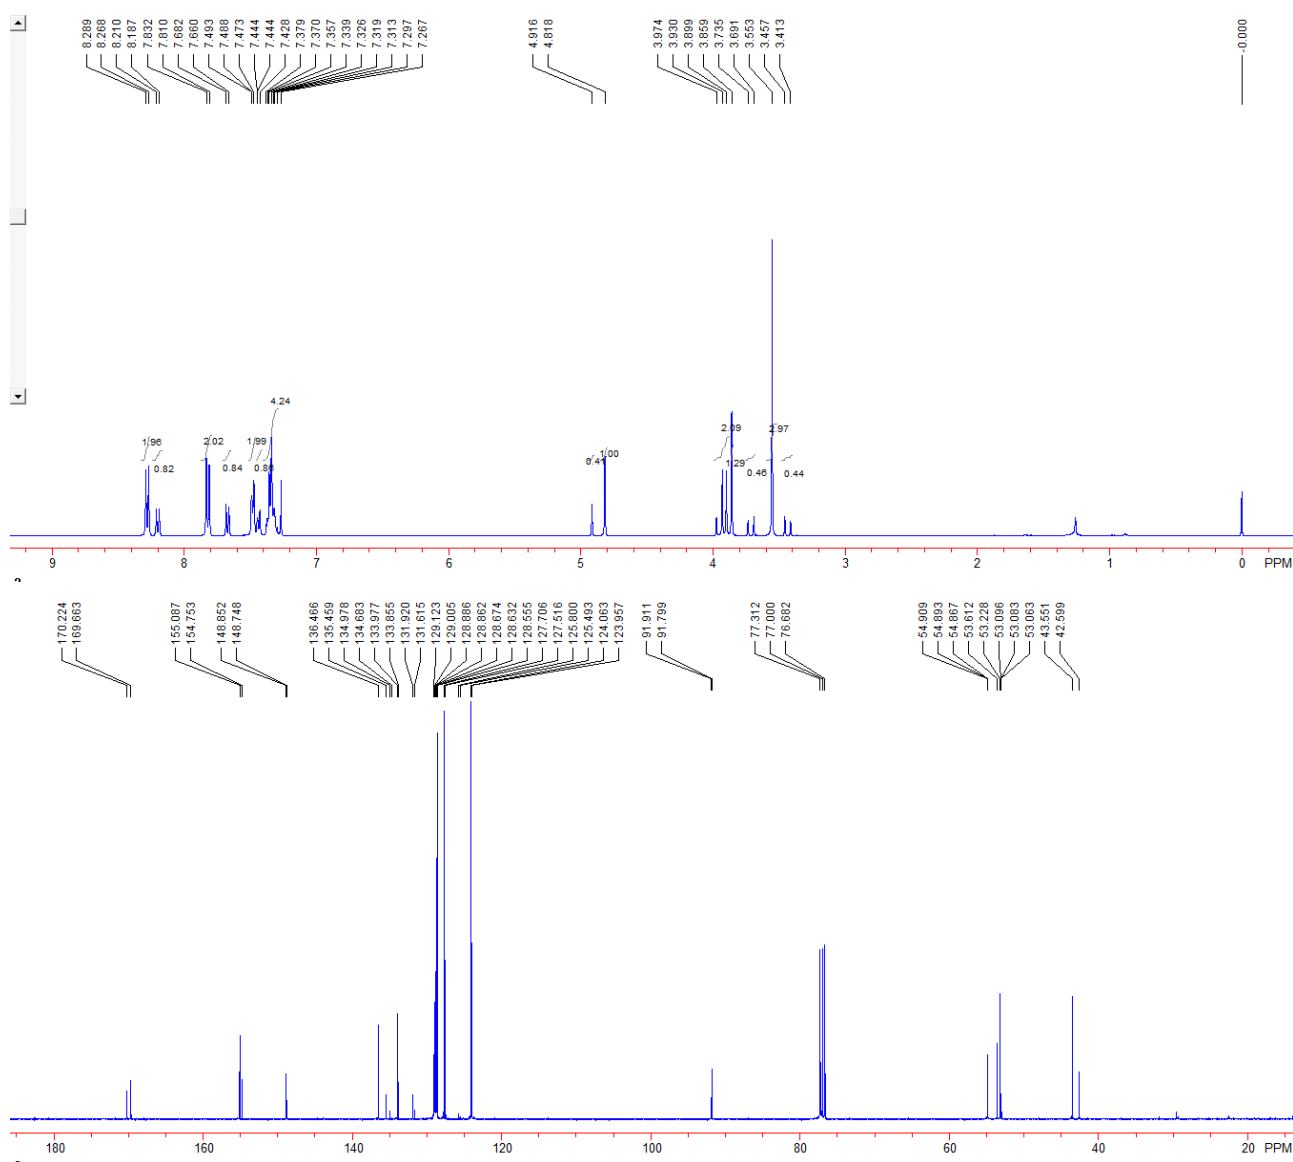



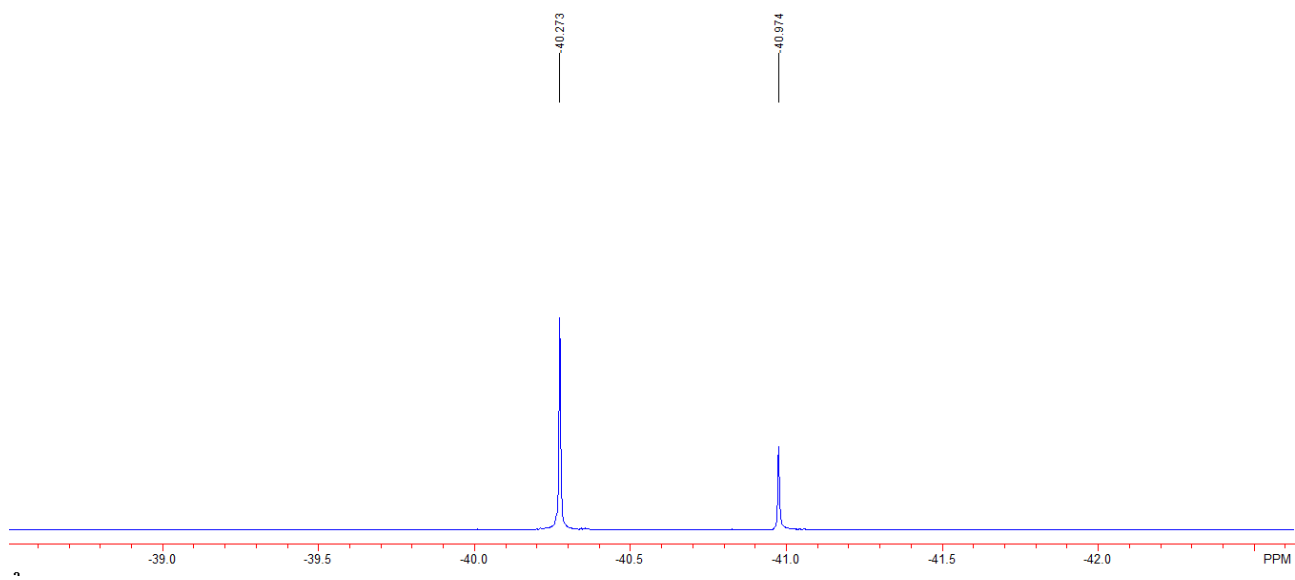

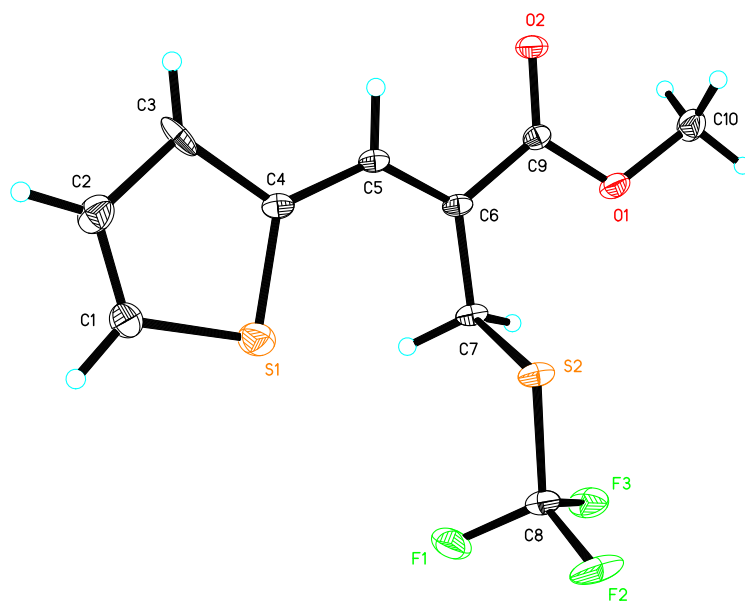

The crystal data of **3I** have been deposited in CCDC with number 1048652. Empirical Formula:  $C_{10}H_9F_3O_2S_2$ ; Formula Weight: 282.29; Crystal Dimensions: 0.156 x 0.123 x 0.086 mm; Crystal System: Monoclinic; Lattice Parameters:  $a = 9.4647(7)\text{\AA}$ ,  $b = 5.7312(5)\text{\AA}$ ,  $c = 22.1678(18)\text{\AA}$ ,  $\alpha = 90^\circ$ ,  $\beta = 100.2830(10)^\circ$ ,  $\gamma = 90^\circ$ ,  $V = 1183.16(17)\text{\AA}^3$ ; Space group: P 1 21/n 1;  $Z = 4$ ;  $D_{calc} = 1.585\text{ g/cm}^3$ ;  $F_{000} = 576$ ; Final R indices [ $I > 2\sigma(I)$ ]  $R1 = 0.0645$ ,  $wR2 = 0.1972$ .
